# Supplementary material for: Amplification of Elevation-Dependent Temperature Variability Since the Last Glacial Maximum
Source: Research Square preprint supplement (doi:10.21203/rs.3.rs-622682/v1), 2021-08-10
Supplement: Supplementary file 1 [file 507de7d66c95343a8d2d89af.xlsx]

## Sheet: Metadata
Site Location					Source and attribution		Proxy record					Time series
Site Name	Country Ocean	Lat (°)	Lon (°)	Elevation(m)	Reference	Original data Citation	Archive Type	Proxy Type	Proxy Detail	Calibration Method	Seasonality	Max Year(BP)	Min Year(BP)	Ages Per kyr	Resolution (yr)	Additional 14C reference
Congo Basin	Africa>Central Africa>Congo River basin	-5.58833	11.2217	0	Weijers et al.,2007	https://www.ncdc.noaa.gov/paleo/study/6403	Lake sediments	bGDGTs	MBT-CBT	MBT = 0.122 + 0.187*CBT + 0.020*MAT	annual	25790	30	0.582298	189	Schefuß et al. (2005)
Zagoskin Lake	North America>America>Alaska	63.448	-162.105	7	Kurek et al., 2009a	https://www.ncdc.noaa.gov/paleo/study/8706	Lake sediments	chironomid	assemblage	WAP-LS	July	33100	5550	0.4	353	Muhs et al. (2003)
Akvaquak	North America>Canada>eastern Baffin Island	66.78	-63.95	17	Fréchette, B. and Anne, d.V., 2009	www.ncdc.noaa.gov/paleo/study/25890	Lake sediments	pollen	assemblage	MAT	July	8334	10	0.600673	189.182	in original's publication
Berkut	Europe>Eastern Europe>Russian Federation	66.34	36.66	25	Ilyashuk et al., 2005	Original data	Lake sediments	chironomid	assemblage	WA-PLS	summer	10118	14	0.791766	237	in original's publication
lake V57	North America>Canada>Victoria	68.657	-105.357	27	Porinchu et al., 2008	https://www.ncdc.noaa.gov/paleo/study/6201	Lake sediments	chironomid	assemblage	WA-PLS	July	1918	-50	1.52467	76	in original's publication
Homestead Scarp	Australia>New Zealand>New Zealand	-52.5518	169.138	30	McGlone et al., 2010	Original data	Peat	pollen	assemblage	MAT	summer	12246.9	-39	1.41208	52.82	in original's publication
Llet-Ti	Europe>Eastern Europe>Russian Federation	66.52	59.3	50	Väliranta et al., 2015	Original data	Lake sediments	pollen	assemblage	WA-PLS	summer	12836	-90	0.578991	97.3	Väliranta et al. (2006)
Bangeojin	Asia>Eastern Asia>Korea	35.48	129.43	54	Park, 2011	Digitalization	Lake sediments	pollen	assemblage	PFT-MAT	annual	4856.23	52	0.624399	102.226	Jo et al. (1979)
Longwoods	Australia>New Zealand>New Zealand	-46.23	167.83	60	Wilmshurst et al., 2007	Original data	Peat	pollen	assemblage	WMAT	annual	16974.3	914.462	0.36083	420.135	McGlone and Bathgate. (1983)
Rainbow	North America>America>Alaska	60.7167	-150.8	63	Clegg et al., 2011	www.ncdc.noaa.gov/paleo/study/15444	Lake sediments	chironomid	assemblage	WA-PLS	summer	13505.5	-54	0.99552	307.139	in original's publication
Iglutalik	North America>Canada>Nunavut	66.14	-66.08	90	Kerwin et al., 2004	www.ncdc.noaa.gov/paleo/study/15444	Lake sediments	pollen	assemblage	MAT	summer	10268.9	-24	0.485754	121.584	Blake. (1972)
Lake Mackenzie	Australia>New Zealand>Australia	-25.4475	153.053	90	Woltering et al., 2014	Digitalization	Lake sediments	bGDGTs	MBT'-CBT	MBT'-CBT, Peterse et al., 2012 10.1016/j.gca.2012.08.011	annual	37261	-48	0.33	527	in original's publication
White Pond	North America>America>South Carolina	34.168	-80.7767	90	Krause et al., 2018	www.ncdc.noaa.gov/paleo/study/25170	Lake sediments	bGDGTs	MBT'-CBT	MBT'-CBT, Peterse et al., 2012 10.1016/j.gca.2012.08.011	annual	20984.8	3974	0.583333	211.5	in original's publication
Lake 4	North America>Canada>Nunavut	65.1	-83.79	100	Rolland et al., 2017	https://www.ncdc.noaa.gov/paleo/study/14188	Lake sediments	chironomid	assemblage	WA-PLS	August	1316	-47	3.66838	50	in original's publication
Kharinei	Europe>Eastern Europe>Russian Federation	67.3628	62.7507	108	Jones et al., 2011	Original data	Lake sediments	chironomid	assemblage	WA-PLS	summer	11502.7	-53	1.81725	315.816	in original's publication
Mount Honey	Australia>New Zealand>New Zealand	-52.5	169.162	120	McGlone et al., 2010	Original data	Peat	pollen	assemblage	MAT	summer	12563	-18	1.33135	114.08	in original's publication
Basin Pond	North America>America>Minnesota	44.5	-70.1	124	Gajewski, 1988	https://www.ncdc.noaa.gov/paleo/study/6221	Lake sediments	pollen	assemblage	MAT	July	1588	-10	-	31	Gajewski et al. (1987)
Lake Bolshie Toroki	Europe>Eastern Europe>Russian Federation	55.39	80.62	128	Zhilich et al., 2017	Original data	Lake sediments	pollen	assemblage	WA-PLS	summer	7892.6	-62	0.502854	101.6	in original's publication
KP2	Europe>Eastern Europe>Russian Federation	68.8	35.32	131	Seppä et al., 2009	Digitalization	Lake sediments	pollen	assemblage	WAPLS	July	8997	0	0.89	148	Seppä et al. (2008)
Laihalampi	Europe>Northern Europe>Scandinavia>Finland	61.4833	26.0833	137	Giesecke et al., 2008	Original data	Lake sediments	pollen	assemblage	WA-PLS	annual	11000	0	0.545455	80.75	Heikkila and Seppä. (2003)
Conroy Lake	North America>America>Minnesota	46.3	-67.9	140	Gajewski, 1988	https://www.ncdc.noaa.gov/paleo/study/6221	Lake sediments	pollen	assemblage	MAT	July	1940	-17	-	33	Gajewski et al. (1987)
Lyadhej-To	Europe>Eastern Europe>Russian Federation	68.26	65.8	150	Andreev et al., 2005	Original data	Lake sediments	pollen	assemblage	BMA	summer	10888.1	68.889	1.20157	171.556	in original's publication
Lyadhej-To	Europe>Eastern Europe>Russian Federation	68.26	65.8	150	Andreev et al., 2005	Original data	Lake sediments	chironomid	assemblage	WA-PLS	summer	10888.1	68.889	1.20157	171.556	in original's publication
Trout Lake	North America>Canada>Yukon Territory	68.828	-138.75	150	Irvine et al., 2012	www.ncdc.noaa.gov/paleo/study/15444	Lake sediments	chironomid	assemblage	WA-PLS	summer	15424.5	63	0.502639	146.1	in original's publication
Lake Braya Sø	North America>Greenland	66.9875	-50.7	170	D'Andrea et al., 2011	www.ncdc.noaa.gov/paleo/study/11176	Lake sediments	alkenone	UK37	Lake water temperature T = 40.8* UK37+31.8, r2=0.96, n=34, RMSE=1.3℃	Summer	6119	-55	1.29585	44	McGowan et al. (2003)
Lac Noir	North America>Canada>Quebec	45.8	-75.1	176	Paquette and Gajewski, 2013	https://www.ncdc.noaa.gov/paleo/study/18735	Lake sediments	pollen	assemblage	MAT	warm season	943	-57	2	10	in original's publication
Grostjorn	Europe>Northern Europe>Scandinavia>Norway	58.53	7.73	180	Seppä et al., 2009	www.ncdc.noaa.gov/paleo/study/15444	Lake sediments	pollen	assemblage	WA-PLS	summer	8914	-47	0.781163	146.5	Eide et al. (2006)
Lake Pieni-Kauro	Europe>Northern Europe>Scandinavia>Finland	64.28	30.12	188.4	Luoto and Helama, 2010	https://www.ncdc.noaa.gov/paleo/study/14188	Lake sediments	chironomid	assemblage	WA-PLS	July	1488	-29	2.63678	44	in original's publication
North Lake	North America>Greenland	69.2417	-50.0267	190	Axford et al., 2013	www.ncdc.noaa.gov/paleo/study/15444	Lake sediments	chironomid	assemblage	WA and WA-PLS	summer	7101.53	-56	0.838278	302.33	in original's publication
Mangshan	Asia>Eastern Asia>China	34.935	113.373	200	Peterse et al., 2011; Yang et al., 2014	Original data	Loess	bGDGTs	MBT-CBT	Original calibration follows Weijers et al., 2007, MBT = 0.122 + 0.187*CBT + 0.020*MAT(n=114; r2=0.77) ; this paper used the Chinese SSM calibration MAAT=20.9-13.4*f(Ⅱ) -17.2*f(Ⅲ)-17.5* f(Ⅱb)+11.2*f(Ⅰb) (r2=0.87, n=120, RMSE=1.7℃,p<0.001) follows Yang et al., 2014	annual	33600	400	-	397	in original's publication
Banks Island -12	North America>Canada>Northwest Territories	72.37	-119.83	220	Gajewski et al., 2000	Original data	Lake sediments	pollen	assemblage	MAT	summer	10183	175	0.29976	302.5	in original's publication
Screaming Lynx	North America>America>Alaska	66.0667	-145.4	223	Clegg et al., 2011	www.ncdc.noaa.gov/paleo/study/15444	Lake sediments	chironomid	assemblage	WA-PLS	summer	10611	-43	1.31406	55	in original's publication
Spruce Pond	North America>America>New York	41.24	-74.2	223	Shuman et al., 2016	Original data	Lake sediments	pollen	assemblage	MAT	summer/annual	29248	100	0.672269	60	Maenza-Gmelch. (1997)
BC01	North America>Canada>Northwest Territories	75.18	-111.92	225	Peros et al., 2010	Original data	Lake sediments	pollen	assemblage	MAT	July	12934	-43	0.830358	593.5	in original's publication
Peatland Klukva	Europe>Eastern Europe>Russian Federation	53.83	36.25	252	Novenko et al., 2015	Original data	Peat	pollen	assemblage	BMA	annual	9450	-16	0.633847	222	in original's publication
Staroselsky Moch	Europe>Eastern Europe>Russian Federation	56.58	32.92	255	Novenko et al., 2018	Original data	Peat	pollen	assemblage	MAT; 2 Calibration method	annual	9792	-19	0.713485	145	Payne et al. (2015)
Kyungpoho	Asia>Eastern Asia>Korea	37.8722	128.9	266	Park, 2011	Digitalization	Lake sediments	pollen	assemblage	PFT-MAT	annual	6896.4	42	0.291767	114.246	Yoon et al. (2008)
Beringia A	North America>America>eastern Beringia	67.5	-165	276	Viau et al., 2008	https://www.ncdc.noaa.gov/paleo/study/8689	Lake/Bog/Pond	pollen	assemblage	MAT	July	25000	0	-	101	in original's publication
Lantian	Asia>Eastern Asia>China	34.2	109.2	278	Gao et al., 2012; Yang et al., 2014	Original data	Loess	bGDGTs	MBT-CBT	Original calibration follows Weijers et al., 2007, MBT = 0.122 + 0.187*CBT + 0.020*MAT(n=114; r2=0.77) ; this paper used the Chinese SSM calibration MAAT=20.9-13.4*f(Ⅱ) -17.2*f(Ⅲ)-17.5* f(Ⅱb)+11.2*f(Ⅰb) (r2=0.87, n=120, RMSE=1.7℃,p<0.001) follows Yang et al., 2014	annual	44800	2900	-	1611.54	in original's publication, revised by Sun et al. (2010)
Gammelheimvatnet	Europe>Northern Europe>Scandinavia>Norway	68.47	17.75	290	Seppä et al., 2009	www.ncdc.noaa.gov/paleo/study/15444	Lake sediments	pollen	assemblage	WA-PLS	summer	8968.1	-42	0.887877	131.18	Birks and Peglar (unpublished)
Quartz Lake	North America>America>Alaska	64.206	-145.814	293	Wooller et al., 2012	www.ncdc.noaa.gov/paleo/study/15444	Lake sediments	chironomid	assemblage	WA-PLS	summer	10949	777	1.37633	193.5	in original's publication
Devils Lake	North America>America>Wisconsin	43.42	-89.73	294	Shuman et al., 2016	Original data	Lake sediments	pollen	assemblage	MAT	summer	10872	7	1.08397	111.8	Baker et al. (1992)
Beringia B	North America>America>eastern Beringia	67.5	-137.5	300	Viau et al., 2008	https://www.ncdc.noaa.gov/paleo/study/8689	Lake/Bog/Pond	pollen	assemblage	MAT	July	25000	0	-	101	in original's publication
Little Pond	North America>America>Massachusetts	42.68	-72.19	302	Marsicek et al., 2013	Original data	Lake sediments	pollen	assemblage	MAT	summer/annual	14999.6	-53	0.497801	155.696	Oswald et al. (2007)
Sharkey	North America>America>Minnesota	44.59	-93.41	308	Shuman et al., 2016	Original data	Lake sediments	pollen	assemblage	MAT	summer/annual	13038.3	634	0.791835	31.1	Camill et al. (2003)
Dark Lake	North America>America>Wisconsin	45.3	-91.5	334	Gajewski, 1988	https://www.ncdc.noaa.gov/paleo/study/6221	Lake sediments	pollen	assemblage	MAT	July	906	0	-	18	Gajewski et al. (1985)
Ruby Lake	North America>America>Wisconsin	45.3	-91.5	335	Gajewski, 1988	https://www.ncdc.noaa.gov/paleo/study/6221	Lake sediments	pollen	assemblage	MAT	July	829	-15	-	17	Gajewski et al. (1985)
Meerfelder Maar	Europe>Western Europe>Germany	50.1	6.75	336.5	Litt et al., 2009	Original data	Lake sediments	pollen	assemblage	PDF	summer/annual	10990	163	-	20	in original's publication
Haugtjern	Europe>Northern Europe>Scandinavia>Norway	60.83	10.88	338	Seppä et al., 2009	www.ncdc.noaa.gov/paleo/study/15444	Lake sediments	pollen	assemblage	WA-PLS	summer	8959	-23	0.89067	135.5	Birks and Peglar (unpublished)
Vouskku (Vuoskkujavri)	Europe>Northern Europe>Scandinavia>Sweden	68.33	19.1	348	Larocque et al., 2004	https://www.ncdc.noaa.gov/paleo/study/6349	Lake sediments	chironomid	assemblage	WA-PLS	July	10042	0	0.980392	176	Bigler et al. (2002)
Dalmutladdo	Europe>Northern Europe>Scandinavia>Norway	69.17	20.72	355	Bjune et al., 2004	www.ncdc.noaa.gov/paleo/study/15444	Lake sediments	pollen	assemblage	WA-PLS	summer	10514	0	1.10842	148	in original's publication
Lake Turkana	Africa>Eastern Africa>Kenya	2.7125	36.537	360	Morrissey et al., 2017	www.ncdc.noaa.gov/paleo/study/16589	Lake sediments	iGDGTs	TEX86	GDGT index2 = TEX-H-86. SST = 68.4 x GDGT index2 + 38.6 (r2 = 0.87; n = 255; p < 0.0001); Kim et al., 2010; 10.1016/j.gca.2010.05.027	annual	13170	1445	2.04691	240	Morrissey and Scholz. (2014)
Lake Mina	North America>America>Minnesota	45.89	-95.478	415	St. Jacques et al., 2008	https://www.ncdc.noaa.gov/paleo/study/16761	Lake sediments	pollen	assemblage	WA-PLS	May	830	50	-	4	in original's publication
Steel	North America>America>Minnesota	46.97	-94.68	415	Shuman et al., 2016	Original data	Lake sediments	pollen	assemblage	MAT	summer/annual	12300	-51	2.48942	92.5	Wright et al. (2004)
Holzmaar	Europe>Western Europe>Germany	50.1167	6.8833	425	Litt et al., 2009	Original data	Lake sediments	pollen	assemblage	PDF	summer	10881	-23	-	40	in original's publication
Moose Lake	North America>America>Alaska	61.3742	-143.599	437	Clegg et al., 2010	www.ncdc.noaa.gov/paleo/study/15444	Lake sediments	chironomid	assemblage	WA-PLS	summer	6007.66	-20	1.65901	37.846	in original's publication
Lac Aurelie	North America>Canada>Quebec	50.42	-74.2297	440	Bajolle et al., 2018	www.ncdc.noaa.gov/paleo/study/24370	Lake sediments	chironomid	assemblage	WA-PLS	summer	8282.12	-19	0.722794	47.03	El-Guellab et al. (2015)
Lake Moon	North America>America>North Dakota	46.86	-98.16	444	Marsicek et al., 2018	Original data	Lake sediments	pollen	assemblage	MAT	summer	10880	-32	1.16356	80.5	Laird et al. (1996)
Burial lake	North America>America>Alaska	68.4433	-159.17	460	Kurek et al., 2009a	https://www.ncdc.noaa.gov/paleo/study/8706	Lake sediments	chironomid	assemblage	WAP-LS	July	32780	1850	0.32	352	in original's publication
Lake of the Clouds	North America>America>Minnesota	48	-91	462	Gajewski, 1988	https://www.ncdc.noaa.gov/paleo/study/6221	Lake sediments	pollen	assemblage	MAT	July	920	-20	-	10	Swain. (1973)
Chuna Lake	Europe>Eastern Europe>Russian Federation	67.95	32.48	475	Solovieva et al., 2005	www.ncdc.noaa.gov/paleo/study/15444	Lake sediments	pollen	assemblage	MAT	summer	8818.77	0	1.58752	216.462	Solovieva and Jones. (2002)
Hell's Kitchen Lake	North America>America>Wisconsin	46.2	-89.7	488	Gajewski, 1988	https://www.ncdc.noaa.gov/paleo/study/6221	Lake sediments	pollen	assemblage	MAT	July	2003	-10	-	22	Swain. (1978)
Hanging Lake	North America>Canada>Yukon Territory	68.38	-138.38	500	Kurek et al., 2009b	https://www.ncdc.noaa.gov/paleo/study/8705	Lake sediments	chironomid	assemblage	WAP-LS	July	15380	1120	0.56101	150	in original's publication
Lake Malawi	Africa>Eastern Africa>Lake Malawi	-11.2939	34.4372	500	Johnson et al., 2016	www.ncdc.noaa.gov/paleo/study/21890	Lake sediments	iGDGTs	TEX86	T = 49.032*TEX86-10.989 (r2= 0.88; n=16); Castaneda and Schouten, 2011; 10.1016/j.quascirev.2015.07.020	annual	23880	250	0.429589	236.958	in original's publication
Bjørnfjelltjørn	Europe>Northern Europe>Scandinavia>Norway	68.43	18.07	510	Bjune et al., 2010	Digitalization	Lake sediments	pollen	assemblage	MAT	July	8860	-45	0.898372	182	Brooks and Birks (unpublished data)
Clear Pond	North America>America>Minnesota	33.8	-79	513	Gajewski, 1988	https://www.ncdc.noaa.gov/paleo/study/6221	Lake sediments	pollen	assemblage	MAT	July	1898	-10	-	39	Gajewski et al. (1987)
Tsuolbmajavri	Europe>Northern Europe>Scandinavia>Sweden	68.41	22.05	526	Seppä and Birks, 2001	www.ncdc.noaa.gov/paleo/study/15444	Lake sediments	pollen	assemblage	WA-PLS	summer	8967	-45	0.89	67	Seppä and Weckström. (1999)
Tsuolbmajavri	Europe>Northern Europe>Scandinavia>Sweden	68.41	22.05	526	Korhola et al., 2002	www.ncdc.noaa.gov/paleo/study/15444	Lake sediments	chironomid	assemblage	WA-PLS	summer	10719.3	0	0.746316	72.321	Seppä and Weckström. (1999)
Hulun lake	Asia>Eastern Asia>China	49.13	117.5	545.3	Wen et al., 2010	Original data	Lake sediments	pollen	assemblage	WA-PLS	summer/annual	11035	-5	1.17754	73.2	in original's publication
Clarks Junction	Australia>New Zealand>New Zealand	-45.72	170.12	560	Wilmshurst et al., 2007	Original data	Peat	pollen	assemblage	MAT	annual	16800	944.727	0.723637	421.46	McGlone et al. (2004)
Tibetanus	Europe>Northern Europe>Scandinavia>Sweden	68.33	18.7	560	Hammarlund et al., 2002	www.ncdc.noaa.gov/paleo/study/15444	Lake sediments	pollen	assemblage	WA-PLS	summer	10237.5	39.4	1.07863	236	Barnekow. (1999)
Oykjamyrtjorn	Europe>Northern Europe>Scandinavia>Norway	59.82	6	570	Bjune et al., 2005	https://www.ncdc.noaa.gov/paleo/study/15444	Lake sediments	chironomid	assemblage	WA-PLS	July	13228	141	0.84	242	in original's publication
Tashiro Mire	Asia>Eastern Asia>Japan	40.68	114.92	570	Yoshida and Takeuti, 2009	Digitalization	Lake sediments	pollen	assemblage	MAT	warmest	15000	0	-	172.414	Yoshida. (2006)
Hudson	North America>America>Alaska	61.9	-145.667	657	Clegg et al., 2011	www.ncdc.noaa.gov/paleo/study/15444	Lake sediments	chironomid	assemblage	WA-PLS	summer	9574	-28	1.87462	96.828	in original's publication
Ajax Bog	Australia>New Zealand>New Zealand	-46.42	169.28	680	Wilmshurst et al., 2007	Original data	Peat	pollen	assemblage	WMAT	annual	14212	784.667	0.534982	185.666	McGlone et al. (2004)
Yongneup	Asia>Eastern Asia>Korea	38.29	128.248	683	Park, 2011	Digitalization	Peat	pollen	assemblage	WA-PLS	annual	7478.92	137.041	0.681025	209.768	Chang et al. (1987)
Beringia C	North America>America>eastern Beringia	62.5	-165	686	Viau et al., 2008	https://www.ncdc.noaa.gov/paleo/study/8689	Lake/Bog/Pond	pollen	assemblage	MAT	July	19000	0	-	124	in original's publication
Beringia D	North America>America>eastern Beringia	62.5	-137.5	722	Viau et al., 2008	https://www.ncdc.noaa.gov/paleo/study/8689	Lake/Bog/Pond	pollen	assemblage	MAT	July	22500	0	-	101	in original's publication
Sihailongwan	Asia>Eastern Asia>China	42.17	126.36	765	Chu et al., 2011	Original data	Lake sediments	alkenone	UK'37	Growing season temperature UK'37=0.0011 * T2-0.0157 * T+0.1057 ; R2 = 0.99 (culture experiment, 10-22℃); Sun et al., 2007	Growing season	1558	-52	66.4514	19	in original's publication
Egelsee	Europe>Western Europe>Switzerland	47.18	8.58	770	Larocquetobler et al., 2010	Original data	Lake sediments	chironomid	assemblage	WA-PLS	summer	15491.9	1548.87	2.18149	197.445	in original's publication
Lake Tanganyika	Africa>Eastern Africa>Lake Tanganyika	-6.72	29.83	773	Tierney et al., 2008	www.ncdc.noaa.gov/paleo/study/6206	Lake sediments	iGDGTs	TEX86	TEX86 = 0.017*LST+0.25 (r2= 0.96); Powers et al., 2005; 10.1029/2004GL022014	annual	59454	1313	1.02929	182	in original's publication
Isbenttjonn	Europe>Northern Europe>Scandinavia>Norway	59.77	7.43	787	Seppä et al., 2009	www.ncdc.noaa.gov/paleo/study/15444	Lake sediments	pollen	assemblage	WA-PLS	summer	8890.1	-44	0.783559	143.34	Birks and Peglar (unpublished)
Sjuuodjijaure	Europe>Northern Europe>Scandinavia>Sweden	67.37	18.07	826	Rosén et al., 2003	www.ncdc.noaa.gov/paleo/study/15444	Lake sediments	pollen	assemblage	WA-PLS	summer	9317	36	1.17524	185	in original's publication
Sjuuodjijaure	Europe>Northern Europe>Scandinavia>Sweden	67.37	18.07	826	Rosén et al., 2003	www.ncdc.noaa.gov/paleo/study/15444	Lake sediments	chironomid	assemblage	WA-inv	summer	9317	0	1.18527	193.528	in original's publication
Lake 850	Europe>Northern Europe>Scandinavia>Sweden	68.37	19.12	850	Shemesh et al., 2001	www.ncdc.noaa.gov/paleo/study/15444	Lake sediments	chironomid	assemblage	WA-PLS	summer	9266	274	0.524941	76.8135	in original's publication
Yanshan	Asia>Eastern Asia>China	40.5	117.75	862	Xu et al., 2004	Digitalization	Peat	pollen	assemblage	PRS	July	4600	0	0.652174	139.394	in original's publication
Lake Challa	Africa>Eastern Africa>Kenya	-3.3167	37.7	880	Sinninghe Damsté et al., 2012	10.1594/PANGAEA.880136	Lake sediments	bGDGTs	MBT-CBT and BrGDGT Fractional Abundance	Two calibrations used, both given equal weight in interpretations: Tierney et al., 2010, 10.1016/j.gca.2010.06.002; Pearson et al., 2011, 10.1016/j.gca.2011.07.042	annual	24896	-49	10.79	55	Blaauw et al. (2011)
Flotatjonn	Europe>Northern Europe>Scandinavia>Norway	59.67	7.55	890	Seppä et al., 2009	www.ncdc.noaa.gov/paleo/study/15444	Lake sediments	pollen	assemblage	WA-PLS	summer	9020.71	-43.5	0.55162	181.125	Birks and Peglar (unpublished)
Hani peat	Asia>Eastern Asia>China	42.2167	126.517	910	Zheng et al., 2017	Original data	Peat	bGDGTs	MBT'-5Me	annual peat (°C) = 52.18 * MBT'-5Me - 23.05 (n = 96, R2 = 0.76, RMSE = 4.7°C), Naafs et al., 2017; 10.1016/j.gca.2017.01.038	annual	16180	0	0.67	154	in original's publication
Platypus Tarn	Australia>New Zealand>Australia	-42.6734	146.587	941	Rees et al., 2010	Original data	Lake sediments	chironomid	assemblage	WA-PLS	summer	15862.9	31.369	0.417759	224.051	in original's publication
Breitnau-Neuhof	Europe>Western Europe>Germany	47.93	8.07	986	Marsicek et al., 2018	Original data	Peat	pollen	assemblage	MAT	summer	10758.4	198.81	1.18632	132.29	Roesch. (1989)
Lake Nujulla	Europe>Northern Europe>Scandinavia>Sweden	68.4	18.7	999	Larocque et al., 2004	https://www.ncdc.noaa.gov/paleo/study/6349	Lake sediments	chironomid	assemblage	WA-PLS	July	9477	0	0.524947	183.16	Larocque et al. (2004)
Shuizhuyang	Asia>Eastern Asia>China	26.7667	119.033	1007	Wang et al., 2017	Digitalization	Peat	bGDGTs	MBT'-CBT	MAAT=0.81-5.67*CBT+31.0*MBT',follows Peterse et al., 2012	annual	30000	0	0.266667	500	in original's publication, combined with Yue et al. (2012)
Komado Mire	Asia>Eastern Asia>Japan	37.2167	139.617	1100	Yoshida and Takeuti, 2009	Digitalization	Peat	pollen	assemblage	MAT	warmest/annual	17500	0	0.298596	279	Yoshida et al. (2008)
Wonderkrater	Africa>Southern Africa>South Africa	-24.4391	28.7507	1110	Truc et al., 2013	Original data	Lake sediments	pollen	assemblage	PDF	summer/annual	19575	-29	0.914457	293	Scott et al. (2003)
Lake Victoria	Africa>Eastern Africa>Lake Victoria	-1.2317	33.1983	1133	Berke et al., 2012	www.ncdc.noaa.gov/paleo/study/16618	Lake sediments	iGDGTs	TEX86	GDGT index2 = TEX-H-86. SST = 68.4 x GDGT index2 + 38.6 (r2 = 0.87; n = 255; p < 0.0001); Kim et al., 2010; 10.1016/j.gca.2010.05.027	annual	15176.1	1372.66	1.12916	189.84	in original's publication
Ximenglongtan	Asia>Eastern Asia>China	22.64	99.6	1140	Ning et al., 2019	Digitalization	Lake sediments	bGDGTs	MBT'-5Me	MAAT=-8.57+31.45*MBT'5ME,n=222, R2=0.66, RMSE=4.8 °C, for global soils, based on De Jonge et al.(2014)	annual	9400	0	1.2766	88.6792	Ning et al. (2017)
Holebudalen	Europe>Northern Europe>Scandinavia>Norway	59.83	6.98	1144	Seppä et al., 2009	www.ncdc.noaa.gov/paleo/study/15444	Lake sediments	pollen	assemblage	WA-PLS	summer	10948.2	-10	0.638818	263.215	Eide et al. (2009)
Holebudalen	Europe>Northern Europe>Scandinavia>Norway	59.83	6.98	1144	Seppä et al., 2009	www.ncdc.noaa.gov/paleo/study/15444	Lake sediments	chironomid	assemblage	WA-PLS	summer	10948.2	-10	0.638818	263.215	Eide et al. (2009)
Keele	North America>Canada>Northwest Territories	64.17	-127.62	1150	Marsicek et al., 2018	Original data	Lake sediments	pollen	assemblage	MAT	annual	10888	0	0.5	275.4	Szeicz et al. (1995)
Ratasjoen	Europe>Northern Europe>Scandinavia>Norway	62.27	9.83	1169	Velle et al., 2005	www.ncdc.noaa.gov/paleo/study/15444	Lake sediments	chironomid	assemblage	WA-PLS	summer	11620.9	-49	0.685525	150.392	Velle et al. (2005)
Frozen Lake	North America>Canada>British Columbia	49.6	-121.467	1180	Rosenberg et al., 2004	Original data	Lake sediments	chironomid	assemblage	WA-PLS	summer	11426.5	-128	0.865467	241.725	in original's publication
Daihai	Asia>Eastern Asia>China	40.59	112.67	1225	Xu et al., 2003	Digitalization	Lake sediments	pollen	assemblage	PRS	July	12000	0	0.67	44.1176	Xiao et al. (2004)
Qigai Nuur	Asia>Eastern Asia>China	39.5789	109.894	1252	Sun and Feng, 2013	Digitalization	Lake sediments	pollen	assemblage	PFT-MAT	annual	10700	0	1.58879	48	in original's publication
Brurskardstjorni	Europe>Northern Europe>Scandinavia>Norway	61.42	8.67	1309	Velle et al., 2005	www.ncdc.noaa.gov/paleo/study/15444	Lake sediments	chironomid	assemblage	WA-PLS	July	10900.4	-27	0.732103	172.624	in original's publication
Upper Fly Lake	North America>Canada>Yukon Territory	61.07	-138.09	1326	Bunbury et al., 2009	www.ncdc.noaa.gov/paleo/study/15444	Lake sediments	pollen	assemblage	MAT	summer	13416.8	0	0.583333	244.797	in original's publication
Gemini Inferiore	Europe>Southern Europe>Italy	44.3894	10.0475	1349	Samartin et al., 2017	www.ncdc.noaa.gov/paleo/study/21030	Lake sediments	chironomid	assemblage	WA-PLS	summer	14020	-58	0.912257	140.5	in original's publication
Baiyinchagan	Asia>Eastern Asia>China	41.65	115.21	1355	Jiang et al., 2010	Digitalization	Lake sediments	pollen	assemblage	PFT-MAT	warmest month	12500	0	0.72	138.889	Jiang et al. (2006)
Andy	North America>Canada>Northwest Territories	64.65	-128.08	1360	Szeicz et al.,1995	www.ncdc.noaa.gov/paleo/study/15444	Lake sediments	pollen	assemblage	MAT	annual	13192	174	0.408038	174	in original's publication
Lago Verdarolo	Europe>Southern Europe>Italy	44.36	10.12	1390	Samartin et al., 2017	www.ncdc.noaa.gov/paleo/study/21030	Lake sediments	chironomid	assemblage	WA-PLS	summer	13720	-59	1.16096	253.5	in original's publication
Qionghai	Asia>Eastern Asia>China	27.845	102.336	1508	Wang et al., 2020	Digitalization	Lake sediments	bGDGTs	MBT-CBT	MAT=6.803-7.062*CBT+37.090*MBT, R2=0.62, RMSE=5.24 °C, after Sun et al. (2011)	annual	27710	-5	0.577409	395.929	in original's publication, combined with Wang et al. (2019a, 2019b)
Hinterburgsee	Europe>Western Europe>Switzerland	46.7176	8.0677	1515	Heiri et al., 2003	www.ncdc.noaa.gov/paleo/study/15854	Lake sediments	pollen	assemblage	MAT	summer/annual	12901	-41	1.41185	201	Heiri et al. (2003)
Lago de Ajo	Europe>Southern Europe>Spain	43.05	-6.15	1570	Marsicek et al., 2018	Original data	Lake sediments	pollen	assemblage	MAT	summer/annual	10922.5	0	0.500003	128.37	Allen et al. (1996)
Lake Balikun	Asia>Eastern Asia>China	43.6642	92.8028	1570	Zhao et al., 2017	Original data	Lake sediments	alkenone	UK37	Early summer Lake Surface, Combined T = 44.598 * UK37 + 38.056; R2 = 0.66 (mordern water filters samples for Type 1) in this paper and T = 24.75 × UK37 + 23.51; R2=0.95( saline lake haptophyte species for Type 2) in Nakamura et al. 2014	Summer	21202	2728	0.541301	154	Zhao et al. (2015)
Tigalmamine	Africa>Northern Africa>Morocco	32.9	-4.65	1630	Cheddadi et al., 1998	Original data	Lake sediments	pollen	assemblage	MAT	annual	12278	-26	0.582072	111.511	Lamb et al. (1995)
Xingyun lake	Asia>Eastern Asia>China	24.34	102.79	1722	Wu et al., 2018	Original data	Lake sediments	pollen	assemblage	WA-PLS	summer	14192	-27	1.74607	206	in original's publication
Graechen See	Europe>Western Europe>Switzerland	46.2	7.85	1725	Krisai et al., 2006	Original data	Lake sediments	pollen	assemblage	MAT	annual	8318.67	25.36	1.32637	92.61	in original's publication
Taul dintre Brazi	Europe>Eastern Europe>Romania	45.3964	22.9017	1740	Toth et al., 2015	Original data	Lake sediments	chironomid	assemblage	WA-PLS	summer	12028	2050	1.41443	85	in original's publication
Dajiuhu(MAT)	Asia>Eastern Asia>China	31.4853	110.002	1751	Huang et al., 2013	Digitalization	Peat	pollen	assemblage	MAT	annual	22000	0	0.191781	276.316	Li et al. (2013)
Dajiuhu(July)	Asia>Eastern Asia>China	31.4853	110.002	1760	Liu et al., 2000	Digitalization	Lake sediments	pollen	assemblage	MAT	July	12500	0	0.56	73.5294	in original's publication
Lake Silvaplana	Europe>Western Europe>Switzerland	46.5	9.8	1791	Larocque-Tobler et al., 2010	http://www.ncdc.noaa.gov/paleo/study/10427	Lake sediments	chironomid	assemblage	WA-PLS	July	918	-25	-	1	in original's publication
Seebergsee	Europe>Western Europe>Switzerland	46.15	7.5	1830	Larocque-Tobler et al., 2012	http://www.ncdc.noaa.gov/paleo/study/12899	Lake sediments	chironomid	assemblage	WA-PLS	July	867	-51	-	1	in original's publication
Tana Lake	Africa>Eastern Africa>Ethiopia	12	37.3	1830	Loomis et al., 2015	Digitalization	Lake sediments	bGDGTs	Branched GDGT Fractional Abundance	annual = 22.77 - 33.58 x f(GDGT-III) - 12.88 x f(GDGT-II) - 418.53 x f(GDGT-IIc) + 86.43 x f(GDGT-1b); r2 = 0.94; RMSE = 1.9°C; RMSEP = 2.1°C; Loomis et al., 2012 (this paper)	annual	16052.9	397.063	0.861851	208.98	Marshall et al. (2011)
Tengchongqinghai	Asia>Eastern Asia>China	25.13	98.567	1885	Zhao et al., 2020	Original data	Lake sediments	bGDGTs	Index1	MAAT=12.18+19.11*Index1, R2=0.92,RMSE=2.49°C (combined the calibrations functions based on East African lakes and SW Chinese lakes)	annual	34535	731	0.38457	285.612	in original's publication
Lake Cadagno	Europe>Western Europe>Switzerland	46.5507	8.7139	1921	Niemann et al. 2012	www.ncdc.noaa.gov/paleo/study/12909	Lake sediments	bGDGTs	MBT-CBT	MBT = 0.122 + 0.187 * CBT + 0.020 * MAT (R2 = 0.77); Weijers et al., 2007; 10.1016/j.gca.2006.10.003	annual	10942	-44	1.00132	146	in original's publication
Saegistalsee	Europe>Western Europe>Switzerland	46.68	7.98	1940	Wick et al., 2003	Original data	Lake sediments	pollen	assemblage	MAT	summer	8947.68	-41	1.22382	35.1	Lotter and Birks. (2003)
3MPond	North America>Canada>British Columbia	49.9833	-121.217	1950	Pellatt et al., 2000	Original data	Lake sediments	chironomid	assemblage	WA-PLS	summer	11810	-275	0.248242	366	in original's publication
North Crater Lake	North America>Canada>British Columbia	49.07	-120.02	2120	Palmer et al., 2002	Original data	Lake sediments	chironomid	assemblage	WA-PLS	summer	12602.4	7.341	0.667075	219.184	in original's publication
Yuanbao	Asia>Eastern Asia>China	35.6333	103.15	2177	Jia et al., 2013; Yang et al., 2014	Original data	Loess	bGDGTs	MBT-CBT	Original calibration follows Weijers et al., 2007, MBT = 0.122 + 0.187*CBT + 0.020*MAT(n=114; r2=0.77) ; this paper used the Chinese SSM calibration MAAT=20.9-13.4*f(Ⅱ) -17.2*f(Ⅲ)-17.5* f(Ⅱb)+11.2*f(Ⅰb) (r2=0.87, n=120, RMSE=1.7℃,p<0.001) follows Yang et al., 2014	annual	70000	1114.98	0.591017	1338.56	Lai and Wintle. (2006); Lai et al. (2007)
Fanjingshan	Asia>Eastern Asia>China	27.8999	108.708	2200	Qiao et al., 1996	Digitalization	Lake sediments	pollen	assemblage	MAT	warmest/annual	10000	0	0.4	89.2857	in original's publication
Lake Redon	Europe>Southern Europe>Spain	42.5	0.75	2280	Pla, S. and Catalan, J., 2004.	https://www1.ncdc.noaa.gov/pub/data/paleo/pages2k/pages2k-temperature-v2-2017/data-current-version/Eur-CentralandEasternPyrenees.Pla.2004.txt	Lake sediments	chrysophyte	assemblage	WAP-LS	winter/spring	1372	-44	6.35593	25	Pla. (1999)
Sacred lake	Africa>Eastern Africa>Kenya	0.08	37.53	2350	Loomis et al., 2012	www.ncdc.noaa.gov/paleo/study/13676	Lake sediments	bGDGTs	Branched GDGT Fractional Abundance	annual = 22.77 - 33.58 x f(GDGT-III) - 12.88 x f(GDGT-II) - 418.53 x f(GDGT-IIc) + 86.43 x f(GDGT-1b); r2 = 0.94; RMSE = 1.9°C; RMSEP = 2.1°C; Loomis et al., 2012 (this paper)	annual	47730	63	1.50792	213	in original's publication, combined with Olago et al. (2001)
Lake Sungan	Asia>Eastern Asia>China	38.8667	94.25	2793	He et al., 2013	Original data	Lake sediments	alkenone	UK'37	Summer Lake Surface, UK'37=0.0011 * T2-0.0157 * T+0.1057 ; R2 = 0.99 (culture experiment, 10-22℃); Sun et al., 2007	Summer	2144.81	-55	1.82	16	in original's publication
Schwarzsee ob Soelden	Europe>Western Europe>Austria	46.97	10.95	2796	Ilyashuk et al., 2011	www.ncdc.noaa.gov/paleo/study/28550	Lake sediments	chironomid	assemblage	WA	summer	10140.3	-36	0.879192	58.536	in original's publication
Lake Gahai	Asia>Eastern Asia>China	37.1333	97.5167	2848	He et al., 2013	Original data	Lake sediments	alkenone	UK'37	Summer Lake Surface, UK'37=0.0011 * T2-0.0157 * T+0.1057 ; R2 = 0.99 (culture experiment, 10-22℃); Sun et al., 2007	Summer	2541.45	-12	1.56685	6	in original's publication
Xiangride	Asia>Eastern Asia>China	36.015	97.921	2956	Sun et al., 2019	Digitalization	aeolian sediments	bGDGTs	Branched GDGT Fractional Abundance	MAAT=7.17+17.1*[Ia]+25.9*[Ib]+34.4*[Ic]-28.6*[IIa],n=222, R2=0.66, RMSE=4.6 °C, for global soils, based on De Jonge et al.(2014)	annual	7100	0	1.12676	142	in original's publication
Lake Rutundu	Africa>Northeast Africa>Lake Rutundu	-0.05	37.4667	3078	Loomis et al., 2017	Original data	Lake sediments	bGDGTs	Branched GDGT Fractional Abundance	MAAT=22.77-33.58*Ⅲa-12.88*Ⅱa-418.53*Ⅱc+86.43*Ⅰb, r2=0.94; RMSE=1.9℃	annual	24330	50	1.03	190	in original's publication
Qinghai lake	Asia>Eastern Asia>China	36.8113	100.137	3194	Hou et al., 2016	www.ncdc.noaa.gov/paleo/study/20518	Lake sediments	alkenone	UK37	Summer Lake Surface T = 17.571 * UK37 + 20.849; R2 = 0.8059; this paper	Summer	15629	0	3.66667	146	in original's publication
Hongyuan	Asia>Eastern Asia>China	32.7667	102.517	3507	Zheng et al., 2015	Original data	Peat	bGDGTs	MBT'-CBT	MAT(°C) = 0.81-5.67 * CBT + 31.0 * MBT' Peterse et al., 2012	annual	13219	0	0.832136	103	Zheng et al. (2014)
Tiancai lake	Asia>Eastern Asia>China	26.6333	99.7167	3898	Feng et al., 2019	Original data	Lake sediments	bGDGTs	Branched GDGT Fractional Abundance	MAAT = 14.74 - 34.46 * f(IIIa) + 27.49 * f(IIa) - 35.36 * f(IIb) - 60.36 * f(Ia)-95.91 * f(Ib); (r2 = 0.93; RMSE = 0.18°C, n=27)	annual	1979	-65	2.5	10.3232	in original's publication
Dangxiong wetland	Asia>Eastern Asia>China	30.5619	91.1778	4280	Cheung et al., 2017	Digitalization	Peat	bGDGTs	MBT'-CBT	MBT'-CBT, Peterse et al., 2012 10.1016/j.gca.2012.08.011	annual	9921	243	0.72	146	in original's publication
Xiada Co	Asia>Eastern Asia>China	33.3919	79.3631	4358	Li et al., 2019	Original data	Lake sediments	bGDGTs	Branched GDGT Fractional Abundance	MAT=5.05+14.86*Index 1(n=222,r2=0.67;RMSE=4.7°C,p<0.001),follows De Jonge et al., 2014	annual	1981.96	-63	2	18.7611	in original's publication
Aweng Co	Asia>Eastern Asia>China	32.75	81.67	4427	Li et al., 2017	Original data	Lake sediments	bGDGTs	MBT'-CBT	MBT'-CBT, Guenther et al., 2014 10.1016/j.orggeochem.2013.11.014	annual	12100	-46	0.498091	184	in original's publication
Dagze co	Asia>Eastern Asia>China	31.9	87.5333	4459	Li et al., 2015	Original data	Lake sediments	alkenone	UK'37	mean annual temperature, UK'37=0.03733*T+0.09799(R2=0.85, n=47, p<0.01),combined with Chu et al., 2005	annual	1932	-52	3.52823	16	in original's publication
Linggo Co	Asia>Eastern Asia>China	33.85	88.58	5059	He et al., 2020	www.frontiersin.org/articles/10.3389/feart.2020.574206/full	Lake sediments	bGDGTs	MBT'-CBT	MAT=-3.84+9.84*CBT+5.92*MBT',follows Günther et al., 2014	annual	16108	0	0.5	88.1104	He et al. (2017)

## Sheet: References
Site	Reference
Congo Basin	Weijers, J.W., Schefuss, E., Schouten, S. and Sinninghe Damste, J.S., 2007. Coupled thermal and hydrological evolution of tropical Africa over the last deglaciation. Science, 315(5819): 1701-4.
Zagoskin Lake	Kurek, J., Cwynar, L.C., Ager, T.A., Abbott, M.B. and Edwards, M.E., 2009a. Late Quaternary paleoclimate of western Alaska inferred from fossil chironomids and its relation to vegetation histories. Quaternary Science Reviews, 28(9-10): 799-811.
Akvaquak	Fréchette, B. and Anne, d.V., 2009. Relationship between Holocene climate variations over southern Greenland and eastern Baffin Island and synoptic circulation pattern. Climate of the Past Discussions, 5: 879-910.
Berkut	Ilyashuk, E.A., Ilyashuk, B.P., Hammarlund, D. and Larocque, I., 2005. Holocene climatic and environmental changes inferred from midge records (Diptera: Chironomidae, Chaoboridae, Ceratopogonidae) at Lake Berkut, southern Kola Peninsula, Russia. The Holocene, 15(6): 897-914.
lake V57	Porinchu, D.F., MacDonald, G.M. and Rolland, N., 2008. A 2000 year midge-based paleotemperature reconstruction from the Canadian Arctic archipelago. Journal of Paleolimnology, 41(1): 177-188.
Homestead Scarp	McGlone, M.S., Turney, C.S.M., Wilmshurst, J.M., Renwick, J. and Pahnke, K., 2010. Divergent trends in land and ocean temperature in the Southern Ocean over the past 18,000 years. Nature Geoscience, 3(9): 622-626.
Llet-Ti	Väliranta, M., Salonen, J.S., Heikkila, M., Amon, L., Helmens, K., Klimaschewski, A., Kuhry, P., Kultti, S., Poska, A., Shala, S., Veski, S. and Birks, H.H., 2015. Plant macrofossil evidence for an early onset of the Holocene summer thermal maximum in northernmost Europe. Nat Commun, 6: 6809.
Bangeojin	Park, J., 2011. A modern pollen–temperature calibration data set from Korea and quantitative temperature reconstructions for the Holocene. The Holocene, 21(7): 1125-1135.
Longwoods	Wilmshurst, J.M., McGlone, M.S., Leathwick, J.R. and Newnham, R.M., 2007. A pre-deforestation pollen-climate calibration model for New Zealand and quantitative temperature reconstructions for the past 18 000 years BP. Journal of Quaternary Science, 22(5): 535-547.
Rainbow	Clegg, B.F., Kelly, R., Clarke, G.H., Walker, I.R. and Hu, F.S., 2011. Nonlinear response of summer temperature to Holocene insolation forcing in Alaska. Proc Natl Acad Sci U S A, 108(48): 19299-304.
Lake McKenzie	Woltering, M., Atahan, P., Grice, K., Heijnis, H., Taffs, K. and Dodson, J., 2014. Glacial and Holocene terrestrial temperature variability in subtropical east Australia as inferred from branched GDGT distributions in a sediment core from Lake McKenzie. Quaternary Research, 82(01): 132-145.
White Pond	Krause, T.R., Russell, J.M., Zhang, R., Williams, J.W. and Jackson, S.T., 2018. Late Quaternary vegetation, climate, and fire history of the Southeast Atlantic Coastal Plain based on a 30,000-yr multi-proxy record from White Pond, South Carolina, USA. Quaternary Research: 1-20.
Iglutalik	Kerwin, M.W., Overpeck, J.T., Webb, R.S. and Anderson, K.H., 2004. Pollen-based summer temperature reconstructions for the eastern Canadian boreal forest, subarctic, and Arctic. Quaternary Science Reviews, 23(18-19): 1901-1924.
Lake 4	Rolland, N., Larocque, I., Francus, P., Pienitz, R. and Laperrière, L., 2017. Evidence for a warmer period during the 12th and 13th centuries AD from chironomid assemblages in Southampton Island, Nunavut, Canada. Quaternary Research, 72(1): 27-37.
Kharinei	Jones, V.J., Solovieva, N., Self, A.E., McGowan, S., Rosén, P., Salonen, J.S., Seppä, H., Väliranta, M., Parrott, E. and Brooks, S.J., 2011. The influence of Holocene tree-line advance and retreat on an arctic lake ecosystem: a multi-proxy study from Kharinei Lake, North Eastern European Russia. Journal of Paleolimnology, 46(1): 123-137.
Mount Honey	McGlone, M.S., Turney, C.S.M., Wilmshurst, J.M., Renwick, J. and Pahnke, K., 2010. Divergent trends in land and ocean temperature in the Southern Ocean over the past 18,000 years. Nature Geoscience, 3(9): 622-626.
Basin Pond	Gajewski, K., 1988. Late holocene climate changes in eastern North America estimated from pollen data. Quaternary Research, 29(3): 255-262.
Lake Bolshie Toroki	Zhilich, S., Rudaya, N., Krivonogov, S., Nazarova, L. and Pozdnyakov, D., 2017. Environmental dynamics of the Baraba forest-steppe (Siberia) over the last 8000 years and their impact on the types of economic life of the population. Quaternary Science Reviews, 163: 152-161.
KP2	Seppä, H., Bjune, A.E., Telford, R.J., Birks, H.J.B. and Veski, S., 2009. Last nine-thousand years of temperature variability in Northern Europe. Clim. Past., 5: 523-535.
Laihalampi	Giesecke, T., Bjune, A.E., Chiverrell, R.C., Seppä, H., Ojala, A.E.K. and Birks, H.J.B., 2008. Exploring Holocene continentality changes in Fennoscandia using present and past tree distributions. Quaternary Science Reviews, 27(13-14): 1296-1308.
Conroy Lake	Gajewski, K., 1988. Late holocene climate changes in eastern North America estimated from pollen data. Quaternary Research, 29(3): 255-262.
Lyadhej-To	Andreev, A.A., Tarasov, P.E., Ilyashuk, B.P., Ilyashuk, E.A., Cremer, H., Hermichen, W.-D., Wischer, F. and Hubberten, H.-W., 2005. Holocene environmental history recorded in Lake Lyadhej-To sediments, Polar Urals, Russia. Palaeogeography, Palaeoclimatology, Palaeoecology, 223(3-4): 181-203.
Lyadhej-To	Andreev, A.A., Tarasov, P.E., Ilyashuk, B.P., Ilyashuk, E.A., Cremer, H., Hermichen, W.-D., Wischer, F. and Hubberten, H.-W., 2005. Holocene environmental history recorded in Lake Lyadhej-To sediments, Polar Urals, Russia. Palaeogeography, Palaeoclimatology, Palaeoecology, 223(3-4): 181-203.
Trout Lake	Irvine, F., Cwynar, L.C., Vermaire, J.C. and Rees, A.B.H., 2012. Midge-inferred temperature reconstructions and vegetation change over the last ~15,000 years from Trout Lake, northern Yukon Territory, eastern Beringia. Journal of Paleolimnology, 48(1): 133-146.
Lake Braya Sø	D'Andrea, W.J., Huang, Y., Fritz, S.C. and Anderson, N.J., 2011. Abrupt Holocene climate change as an important factor for human migration in West Greenland. Proc Natl Acad Sci U S A, 108(24): 9765-9.
Lac Noir	Paquette, N. and Gajewski, K., 2013. Climatic change causes abrupt changes in forest composition, inferred from a high-resolution pollen record, southwestern Quebec, Canada. Quaternary Science Reviews, 75: 169-180.
Grostjorn	Seppä, H., Bjune, A.E., Telford, R.J., Birks, H.J.B. and Veski, S., 2009. Last nine-thousand years of temperature variability in Northern Europe. Clim. Past., 5: 523-535.
Lake Pieni-Kauro	Luoto, T.P. and Helama, S., 2010. Palaeoclimatological and palaeolimnological records from fossil midges and tree-rings: the role of the North Atlantic Oscillation in eastern Finland through the Medieval Climate Anomaly and Little Ice Age. Quaternary Science Reviews, 29(17-18): 2411-2423.
North Lake	Axford, Y., Losee, S., Briner, J.P., Francis, D.R., Langdon, P.G. and Walker, I.R., 2013. Holocene temperature history at the western Greenland Ice Sheet margin reconstructed from lake sediments. Quaternary Science Reviews, 59: 87-100.
Mangshan loess	Peterse, F., Prins, M.A., Beets, C.J., Troelstra, S.R., Zheng, H., Gu, Z., Schouten, S. and Damsté, J.S.S., 2011. Decoupled warming and monsoon precipitation in East Asia over the last deglaciation. Earth and Planetary Science Letters, 301(1-2): 256-264.
Banks Island -12	Gajewski, K., Mott, R., Ritchie, J. and Hadden, K., 2000. Holocene vegetation history of Banks Island, Northwest Territories, Canada. Canadian Journal of Botany, 78: 430-436.
Spruce Pond	Shuman, B.N. and Marsicek, J., 2016. The structure of Holocene climate change in mid-latitude North America. Quaternary Science Reviews, 141: 38-51.
Screaming Lynx	Clegg, B.F., Kelly, R., Clarke, G.H., Walker, I.R. and Hu, F.S., 2011. Nonlinear response of summer temperature to Holocene insolation forcing in Alaska. Proc Natl Acad Sci U S A, 108(48): 19299-304.
BC01	Peros, M., Gajewski, K., Paull, T., Ravindra, R. and Podritske, B., 2010. Multi-proxy record of postglacial environmental change, south-central Melville Island, Northwest Territories, Canada. Quaternary Research, 73(2): 247-258.
Peatland Klukva	Novenko, E.Y., Tsyganov, A.N., Volkova, E.M., Babeshko, K.V., Lavrentiev, N.V., Payne, R.J. and Mazei, Y.A., 2015. The Holocene paleoenvironmental history of central European Russia reconstructed from pollen, plant macrofossil, and testate amoeba analyses of the Klukva Peatland, Tula Region. Quaternary Research, 83(3): 459-468.
Staroselsky Moch	Novenko, E.Y., Tsyganov, A.N. and Olchev, A.V., 2018. Palaeoecological data as a tool to predict possible future vegetation changes in the boreal forest zone of European Russia: a case study from the Central Forest Biosphere Reserve. IOP Conference Series: Earth and Environmental Science, 107: 012104.
Kyungpoho	Park, J., 2011. A modern pollen–temperature calibration data set from Korea and quantitative temperature reconstructions for the Holocene. The Holocene, 21(7): 1125-1135.
Beringia A	Viau, A.E., Hollings, P., Gajewski, K., Sawada, M.C. and Bunbury, J., 2008. Low- and high-frequency climate variability in eastern Beringia during the past 25 000 yearsThis article is one of a series of papers published in this Special Issue on the theme Polar Climate Stability Network. Canadian Journal of Earth Sciences, 45(11): 1435-1453.
Lantian loess	Gao, L., Nie, J., Clemens, S., Liu, W., Sun, J., Zech, R. and Huang, Y., 2012. The importance of solar insolation on the temperature variations for the past 110kyr on the Chinese Loess Plateau. Palaeogeography, Palaeoclimatology, Palaeoecology, 317-318: 128-133.
Gammelheimvatnet	Seppä, H., Bjune, A.E., Telford, R.J., Birks, H.J.B. and Veski, S., 2009. Last nine-thousand years of temperature variability in Northern Europe. Clim. Past., 5: 523-535.
Quartz Lake	Wooller, M.J., Kurek, J., Gaglioti, B.V., Cwynar, L.C., Bigelow, N., Reuther, J.D., Gelvin-Reymiller, C. and Smol, J.P., 2012. An ~11,200 year paleolimnological perspective for emerging archaeological findings at Quartz Lake, Alaska. Journal of Paleolimnology, 48(1): 83-99.
Devils	Shuman, B.N. and Marsicek, J., 2016. The structure of Holocene climate change in mid-latitude North America. Quaternary Science Reviews, 141: 38-51.
Beringia B	Viau, A.E., Hollings, P., Gajewski, K., Sawada, M.C. and Bunbury, J., 2008. Low- and high-frequency climate variability in eastern Beringia during the past 25 000 yearsThis article is one of a series of papers published in this Special Issue on the theme Polar Climate Stability Network. Canadian Journal of Earth Sciences, 45(11): 1435-1453.
Little Pond	Marsicek, J.P., Shuman, B., Brewer, S., Foster, D.R. and Oswald, W.W., 2013. Moisture and temperature changes associated with the mid-Holocene Tsuga decline in the northeastern United States. Quaternary Science Reviews, 80: 129-142.
Sharkey	Shuman, B.N. and Marsicek, J., 2016. The structure of Holocene climate change in mid-latitude North America. Quaternary Science Reviews, 141: 38-51.
Dark Lake	Gajewski, K., 1988. Late holocene climate changes in eastern North America estimated from pollen data. Quaternary Research, 29(3): 255-262.
Ruby Lake	Gajewski, K., 1988. Late holocene climate changes in eastern North America estimated from pollen data. Quaternary Research, 29(3): 255-262.
Meerfelder Maar	Litt, T., Ohlwein, C., Kühl, N. and Brauer, A., 2009. Vegetation and climate history in the Westeifel Volcanic Field (Germany) during the past 11 000 years based on annually laminated lacustrine maar sediments. Boreas, 38: 679-690.
Haugtjern	Seppä, H., Bjune, A.E., Telford, R.J., Birks, H.J.B. and Veski, S., 2009. Last nine-thousand years of temperature variability in Northern Europe. Clim. Past., 5: 523-535.
Vouskku	Larocque, I., R.I. Hall., 2004. Holocene temperature estimates and chironomid community composition in the Abisko Valley, northern Sweden. Quat. Sci. Rev. 23, 2453–2465.
Dalmutladdo	Bjune, A., Birks, H.J.B. and Seppä, H., 2004. Holocene vegetation and climate history on a continental-oceanic transect in northern Fennoscandia based on pollen and plant macrofossils. Boreas, 33(3): 211-223.
Lake Turkana	Morrissey, A., Scholz, C.A. and Russell, J.M., 2017. Late Quaternary TEX86 paleotemperatures from the world’s largest desert lake, Lake Turkana, Kenya. Journal of Paleolimnology, 59(1): 103-117.
Lake Mina	St. Jacques, J.-M., Cumming, B.F. and Smol, J.P., 2008. A 900-year pollen-inferred temperature and effective moisture record from varved Lake Mina, west-central Minnesota, USA. Quaternary Science Reviews, 27(7-8): 781-796.
Steel	Shuman, B.N. and Marsicek, J., 2016. The structure of Holocene climate change in mid-latitude North America. Quaternary Science Reviews, 141: 38-51.
Holzmaar	Litt, T., Ohlwein, C., Kühl, N. and Brauer, A., 2009. Vegetation and climate history in the Westeifel Volcanic Field (Germany) during the past 11 000 years based on annually laminated lacustrine maar sediments. Boreas, 38: 679-690.
Moose Lake	Clegg, B.F., Clarke, G.H., Chipman, M.L., Chou, M., Walker, I.R., Tinner, W. and Hu, F.S., 2010. Six millennia of summer temperature variation based on midge analysis of lake sediments from Alaska. Quaternary Science Reviews, 29(23-24): 3308-3316.
Lac Aurelie, Quebec	Bajolle, L., Larocque-Tobler, I., Gandouin, E., Lavoie, M., Bergeron, Y. and Ali, A.A., 2018. Major postglacial summer temperature changes in the central coniferous boreal forest of Quebec (Canada) inferred using chironomid assemblages. Journal of Quaternary Science, 33(4): 409-420.
Lake Moon	Marsicek, J., Shuman, B.N., Bartlein, P.J., Shafer, S.L. and Brewer, S., 2018. Reconciling divergent trends and millennial variations in Holocene temperatures. Nature, 554(7690): 92-96.
Burial lake, Alaska	Kurek, J., Cwynar, L.C., Ager, T.A., Abbott, M.B. and Edwards, M.E., 2009a. Late Quaternary paleoclimate of western Alaska inferred from fossil chironomids and its relation to vegetation histories. Quaternary Science Reviews, 28(9-10): 799-811.
Lake of the Clouds	Gajewski, K., 1988. Late holocene climate changes in eastern North America estimated from pollen data. Quaternary Research, 29(3): 255-262.
Chuna Lake	Solovieva, N., Tarasov, P.E. and MacDonald, G., 2005. Quantitative reconstruction of Holocene climate from the Chuna Lake pollen record, Kola Peninsula, northwest Russia. The Holocene, 15(1): 141-148.
Hell's Kitchen Lake	Gajewski, K., 1988. Late holocene climate changes in eastern North America estimated from pollen data. Quaternary Research, 29(3): 255-262.
Lake Malawi	Johnson, T.C., Werne, J.P., Brown, E.T., Abbott, A., Berke, M., Steinman, B.A., Halbur, J., Contreras, S., Grosshuesch, S., Deino, A., Scholz, C.A., Lyons, R.P., Schouten, S. and Damste, J.S., 2016. A progressively wetter climate in southern East Africa over the past 1.3 million years. Nature, 537(7619): 220-224.
Hanging Lake	Kurek, J., Cwynar, L. C., Vermaire, J. C. 2009b. A late Quaternary paleotemperature record from Hanging Lake, northern Yukon Territory, eastern Beringia. Quat. Res. 72, 246–257.
Bjornfjelltjorn	Bjune, A.E., Birks, H.J.B., Peglar, S.M. and Odland, A., 2010. Developing a modern pollen–climate calibration data set for Norway. Boreas, 39(4): 674-688.
Clear Pond	Gajewski, K., 1988. Late holocene climate changes in eastern North America estimated from pollen data. Quaternary Research, 29(3): 255-262.
Tsuolbmajavri Lake	Seppä, H., Birks, H. J. B., 2001. July mean temperature and annual precipitation trends during the Holocene in the Fennoscandian tree-line area: pollen-based climate reconstructions. The Holocene 11, 527–539.
Tsuolbmajavri Lake	Korhola, A., Vasko, K., Toivonen, H.T.T. and Olander, H., 2002. Holocene temperature changes in northern Fennoscandia reconstructed from chironomids using Bayesian modelling. Quaternary Science Reviews, 21(16): 1841-1860.
Hulunhu	Wen, R., Xiao, J., Chang, Z., Zhai, D., Xu, Q., Li, Y. and Itoh, S., 2010. Holocene precipitation and temperature variations in the East Asian monsoonal margin from pollen data from Hulun Lake in northeastern Inner Mongolia, China. Boreas, 39(2): 262-272.
Clarks Junction	Wilmshurst, J.M., McGlone, M.S., Leathwick, J.R. and Newnham, R.M., 2007. A pre-deforestation pollen-climate calibration model for New Zealand and quantitative temperature reconstructions for the past 18 000 years BP. Journal of Quaternary Science, 22(5): 535-547.
Tibetanus	Hammarlund, D., Barnekow, L., Birks, H.J.B., Buchardt, B. and Edwards, T.W.D., 2002. Holocene changes in atmospheric circulation recorded in the oxygen-isotope stratigraphy of lacustrine carbonates from northern Sweden. The Holocene, 12(3): 339-351.
Tashiro Mire	Yoshida, A. and Takeuti, S., 2009. Quantitative reconstruction of palaeoclimate from pollen profiles in northeastern Japan and the timing of a cold reversal event during the Last Termination. Journal of Quaternary Science, 24(8): 1006-1015.
Oykjamyrtjorn	Bjune, A.E., Bakke, J., Nesje, A. and Birks, H.J.B., 2005. Holocene mean July temperature and winter precipitation in western Norvay inferred from palynological and glaciological lake-sediment proxies. The Holocene, 15(2): 177-189.
Hudson	Clegg, B.F., Kelly, R., Clarke, G.H., Walker, I.R. and Hu, F.S., 2011. Nonlinear response of summer temperature to Holocene insolation forcing in Alaska. Proc Natl Acad Sci U S A, 108(48): 19299-304.
Ajax Bog	Wilmshurst, J.M., McGlone, M.S., Leathwick, J.R. and Newnham, R.M., 2007. A pre-deforestation pollen-climate calibration model for New Zealand and quantitative temperature reconstructions for the past 18 000 years BP. Journal of Quaternary Science, 22(5): 535-547.
Yongneup	Park, J., 2011. A modern pollen–temperature calibration data set from Korea and quantitative temperature reconstructions for the Holocene. The Holocene, 21(7): 1125-1135.
Beringia C	Viau, A.E., Hollings, P., Gajewski, K., Sawada, M.C. and Bunbury, J., 2008. Low- and high-frequency climate variability in eastern Beringia during the past 25 000 yearsThis article is one of a series of papers published in this Special Issue on the theme Polar Climate Stability Network. Canadian Journal of Earth Sciences, 45(11): 1435-1453.
Beringia D	Viau, A.E., Hollings, P., Gajewski, K., Sawada, M.C. and Bunbury, J., 2008. Low- and high-frequency climate variability in eastern Beringia during the past 25 000 yearsThis article is one of a series of papers published in this Special Issue on the theme Polar Climate Stability Network. Canadian Journal of Earth Sciences, 45(11): 1435-1453.
Sihailongwan maar	Chu, G., Sun, Q., Wang, X., Liu, M., Lin, Y., Xie, M., Shang, W. and Liu, J., 2011. Seasonal temperature variability during the past 1600 years recorded in historical documents and varved lake sediment profiles from northeastern China. The Holocene, 22(7): 785-792.
Egelsee	Larocque-Tobler, I., Heiri, O. and Wehrli, M., 2010. Late Glacial and Holocene temperature changes at Egelsee, Switzerland, reconstructed using subfossil chironomids. Journal of Paleolimnology, 43(4): 649-666.
Lake Tanganyika	Tierney, J.E., Russell, J.M., Huang, Y., Damste, J.S., Hopmans, E.C. and Cohen, A.S., 2008. Northern hemisphere controls on tropical southeast African climate during the past 60,000 years. Science, 322(5899): 252-5.
Isbenttjonn	Seppä, H., Bjune, A.E., Telford, R.J., Birks, H.J.B. and Veski, S., 2009. Last nine-thousand years of temperature variability in Northern Europe. Clim. Past., 5: 523-535.
Sjuuodjijaure	Rosén, P., Segerström, U., Eriksson, L. and Renberg, I., 2003. Do Diatom, Chironomid, and Pollen Records Consistently Infer Holocene July Air Temperature? A Comparison Using Sediment Cores from Four Alpine Lakes in Northern Sweden. Arctic, Antarctic, and Alpine Research, 35(3): 279-290.
Sjuuodjijaure	Rosén, P., Segerström, U., Eriksson, L. and Renberg, I., 2003. Do Diatom, Chironomid, and Pollen Records Consistently Infer Holocene July Air Temperature? A Comparison Using Sediment Cores from Four Alpine Lakes in Northern Sweden. Arctic, Antarctic, and Alpine Research, 35(3): 279-290.
Lake 850	Shemesh, A., Rosqvist, G., Rietti-Shati, M., Rubensdotter, L., Bigler, C., Yam, R. and Karlén, W., 2001. Holocene climatic change in Swedish Lapland inferred from an oxygen-isotope record of lacustrine biogenic silica. The Holocene, 11(4): 447-454.
Yanshan	Xu, Q.H., Yang, X.L., Yang, Z.J., Liang, W.D., Sun, L.M., 2004. Reconstruction of Climate Changes of Yanshan Mountain Area since 5000a B.P. inferred from pollen data. Scientia Geographica Sinica, 24(3): 339-345(in Chinese with English abstract)
Lake Challa	Sinninghe Damsté, J.S., Ossebaar, J., Schouten, S. and Verschuren, D., 2012. Distribution of tetraether lipids in the 25-ka sedimentary record of Lake Challa: extracting reliable TEX86 and MBT/CBT palaeotemperatures from an equatorial African lake. Quaternary Science Reviews, 50: 43-54.
Flotatjonn	Seppä, H., Bjune, A.E., Telford, R.J., Birks, H.J.B. and Veski, S., 2009. Last nine-thousand years of temperature variability in Northern Europe. Clim. Past., 5: 523-535.
Hani peat	Zheng, Y., Pancost, R.D., Liu, X., Wang, Z., Naafs, B.D.A., Xie, X., Liu, Z., Yu, X. and Yang, H., 2017. Atmospheric connections with the North Atlantic enhanced the deglacial warming in northeast China. Geology, 45(11): 1031-1034.
Platypus Tarn	Rees, A.B.H. and Cwynar, L.C., 2010. Evidence for early postglacial warming in Mount Field National Park, Tasmania. Quaternary Science Reviews, 29(3-4): 443-454.
Breitnau-Neuhof	Marsicek, J., Shuman, B.N., Bartlein, P.J., Shafer, S.L. and Brewer, S., 2018. Reconciling divergent trends and millennial variations in Holocene temperatures. Nature, 554(7690): 92-96.
Lake Nujulla	Larocque, I., R.I. Hall., 2004. Holocene temperature estimates and chironomid community composition in the Abisko Valley, northern Sweden. Quat. Sci. Rev. 23, 2453–2465.
Shuizhuyang peat bog	Wang, M., Zheng, Z., Man, M., Hu, J. and Gao, Q., 2017. Branched GDGT-based paleotemperature reconstruction of the last 30,000 years in humid monsoon region of Southeast China. Chemical Geology, 463: 94-102.
Knmado Mire	Yoshida, A., Takeuti, S. 2009. Quantitative reconstruction of palaeoclimate from pollen profiles in northeastern Japan and the timing of a cold reversal event during the Last Termination. Journal of Quaternary Science: Published for the Quaternary Research Association, 24(8), 1006-1015.
Wonderkrater	Truc, L., Chevalier, M., Favier, C., Cheddadi, R., Meadows, M.E., Scott, L., Carr, A.S., Smith, G.F. and Chase, B.M., 2013. Quantification of climate change for the last 20,000years from Wonderkrater, South Africa: Implications for the long-term dynamics of the Intertropical Convergence Zone. Palaeogeography, Palaeoclimatology, Palaeoecology, 386: 575-587.
Lake Victoria basin	Berke, M.A., Johnson, T.C., Werne, J.P., Grice, K., Schouten, S. and Sinninghe Damsté, J.S., 2012. Molecular records of climate variability and vegetation response since the Late Pleistocene in the Lake Victoria basin, East Africa. Quaternary Science Reviews, 55: 59-74.
Ximenglongtan	Ning, D., Zhang, E., Shulmeister, J., Chang, J., Sun, W. and Ni, Z., 2019. Holocene mean annual air temperature (MAAT) reconstruction based on branched glycerol dialkyl glycerol tetraethers from Lake Ximenglongtan, southwestern China. Organic Geochemistry, 133: 65-76.
Holebudalen	Seppä, H., Bjune, A.E., Telford, R.J., Birks, H.J.B. and Veski, S., 2009. Last nine-thousand years of temperature variability in Northern Europe. Clim. Past., 5: 523-535.
Holebudalen	Seppä, H., Bjune, A.E., Telford, R.J., Birks, H.J.B. and Veski, S., 2009. Last nine-thousand years of temperature variability in Northern Europe. Clim. Past., 5: 523-535.
Keele	Marsicek, J., Shuman, B.N., Bartlein, P.J., Shafer, S.L. and Brewer, S., 2018. Reconciling divergent trends and millennial variations in Holocene temperatures. Nature, 554(7690): 92-96.
Ratasjoen	Velle, G., Brooks, S.J., Birks, H.J.B. and Willassen, E., 2005. Chironomids as a tool for inferring Holocene climate: an assessment based on six sites in southern Scandinavia. Quaternary Science Reviews, 24(12-13): 1429-1462.
Frozen Lake	Rosenberg, S.M., Walker, I.R., Mathewes, R.W. and Hallett, D.J., 2004. Midge-inferred Holocene climate history of two subalpine lakes in southern British Columbia, Canada. The Holocene, 14(2): 258-271.
Daihai	Xu, Q. H., Xiao, J. L., Nakamura, T., Yang, X. L., Yang, Z. J,. Liang, W. D., Biro, I., and Yang, S. Y., 2003. Quantitative reconstructed climatic changes of Daihai basin by pollen data. Mar. Geol. Quat. Geol., 23, 99–108 (in Chinese with English abstract)
Qigai Nuur	Sun, A. and Feng, Z., 2013. Holocene climatic reconstructions from the fossil pollen record at Qigai Nuur in the southern Mongolian Plateau. The Holocene, 23(10): 1391-1402.
Brurskardstjorni	Velle, G., Brooks, S.J., Birks, H.J.B. and Willassen, E., 2005. Chironomids as a tool for inferring Holocene climate: an assessment based on six sites in southern Scandinavia. Quaternary Science Reviews, 24(12-13): 1429-1462.
Upper Fly Lake	Bunbury, J. and Gajewski, K., 2009. Postglacial climates inferred from a lake at treeline, southwest Yukon Territory, Canada. Quaternary Science Reviews, 28(3-4): 354-369.
Gemini Inferiore	Samartin, S., Heiri, O., Joos, F., Renssen, H., Franke, J., Brönnimann, S. and Tinner, W., 2017. Warm Mediterranean mid-Holocene summers inferred from fossil midge assemblages. Nature Geoscience, 10(3): 207-212.
Baiyinchagan	Jiang, W., Guiot, J., Chu, G., Wu, H., Yuan, B., HattÉ, C. and Guo, Z., 2010. An improved methodology of the modern analogues technique for palaeoclimate reconstruction in arid and semi-arid regions. Boreas, 39(1): 145-153.
Andy	Szeicz, J.M., MacDonald, G.M. and Duk-Rodkin, A., 1995. Late Quaternary vegetation history of the central Mackenzie Mountains, Northwest Territories, Canada. Palaeogeography, Palaeoclimatology, Palaeoecology, 113(2): 351-371.
Lago Verdarolo	Samartin, S., Heiri, O., Joos, F., Renssen, H., Franke, J., Brönnimann, S. and Tinner, W., 2017. Warm Mediterranean mid-Holocene summers inferred from fossil midge assemblages. Nature Geoscience, 10(3): 207-212.
Qionghai	Wang, G., Wang, Y., Wei, Z., He, W., Ma, X. and Zhang, T., 2020. Reconstruction of temperature and precipitation spanning the past 28 kyr based on branched tetraether lipids from Qionghai Lake, southwestern China. Palaeogeography, Palaeoclimatology, Palaeoecology: 110094.
Hinterburgsee	Oliver Heiri, André F. Lotter, Sonja Hausmann, and Felix Kienast. 2003. A chironomid-based Holocene summer air temperature reconstruction from the Swiss Alps. The Holocene, 13(4), 477-484.
Lake Balikun	Zhao, J., An, C.B., Huang, Y., Morrill, C. and Chen, F.H., 2017. Contrasting early Holocene temperature variations between monsoonal East Asia and westerly dominated Central Asia. Quaternary Science Reviews, 178: 14-23.
Lago de Ajo	Marsicek, J., Shuman, B.N., Bartlein, P.J., Shafer, S.L. and Brewer, S., 2018. Reconciling divergent trends and millennial variations in Holocene temperatures. Nature, 554(7690): 92-96.
Tigalmamine	Cheddadi, R., Lamb, H.F., Guiot, J. and van der Kaars, S., 1998. Holocene climatic change in Morocco: a quantitative reconstruction from pollen data. Climate Dynamics, 14(12): 883-890.
Xingyun lake	Wu, D., Chen, X., Lv, F., Brenner, M., Curtis, J., Zhou, A., Chen, J., Abbott, M., Yu, J. and Chen, F., 2018. Decoupled early Holocene summer temperature and monsoon precipitation in southwest China. Quaternary Science Reviews, 193: 54-67.
Graechen See	Krisai, R., W. Mayer, C. Schroeck, and R. Tuerk. 2006. Das Gradenmoos in der Schobergruppe (NP Hohe Tauern, Kaerten) Vegetation und Entstehung. Carinthia II, 196/116:359-386.
Taul dintre Brazi	Tóth, M., Magyari, E.K., Buczkó, K., Braun, M., Panagiotopoulos, K. and Heiri, O., 2015. Chironomid-inferred Holocene temperature changes in the South Carpathians (Romania). The Holocene, 25(4): 569-582.
Dajiuhu(MAT)	Huang, K.Y., Wei, J.H., Chen, B.S., Zhang, H., Zheng, Z., Cao, L.L., Zheng, Y.W., 2013. Research progress of pollen-based quantitative paleoclimate reconstruction using Modern Analogue Technique. Quaternary Sciences, 33(6): 1069-1079 (in Chinese with English abstract)
Dajiuhu(July)	Liu, H.P., Tang, X.C., Liu, S.X. 2000.The construction and application of pollen-climate transfer function in Shennongjia Mountain region. Journal of Central China Normal University (Nature Sciences),34(4): 454-459 (in Chinese with English abstract)
Lake Silvaplana	Larocque-Tobler, I., Grosjean, M., Heiri, O., Trachsel, M. and Kamenik, C., 2010. Thousand years of climate change reconstructed from chironomid subfossils preserved in varved lake Silvaplana, Engadine, Switzerland. Quaternary Science Reviews, 29(15-16): 1940-1949.
Tana Lake	Loomis, S.E., Russell, J.M. and Lamb, H.F., 2015. Northeast African temperature variability since the Late Pleistocene. Palaeogeography, Palaeoclimatology, Palaeoecology, 423: 80-90.
Seebergsee	Larocque-Tobler, I., Stewart, M.M., Quinlan, R., Trachsel, M., Kamenik, C. and Grosjean, M., 2012. A last millennium temperature reconstruction using chironomids preserved in sediments of anoxic Seebergsee (Switzerland): consensus at local, regional and Central European scales. Quaternary Science Reviews, 41: 49-56.
Tengchongqinghai	Zhao, C., Rohling, E.J., Liu, Z., Yang, X., Zhang, E., Cheng, J., Liu, Z., An, Z., Yang, X., Feng, X., Sun, X., Zhang, C., Yan, T., Long, H., Yan, H., Yu, Z., Liu, W., Yu, S.-Y. and Shen, J., 2020. Possible obliquity-forced warmth in southern Asia during the last glacial stage. Science Bulletin.
Lake Cadagno	Niemann, H., A. Stadnitskaia, S.B. Wirth, A. Gilli, F.S. Anselmetti, J.S. Sinninghe Damsté, S. Schouten, E.C. Hopmans, and M.F. Lehmann. 2012. Bacterial GDGTs in Holocene sediments and catchment soils of a high Alpine lake: application of the MBT/CBT-paleothermometer. Climate of the Past, Vol. 8, pp. 889-906.
Saegistalsee	Wick, L., van Leeuwen, J.F.N., van der Knaap, W.O. and Lotter, A.F., 2003. Holocene vegetation development in the catchment of Sägistalsee (1935 m asl), a small lake in the Swiss Alps. Journal of Paleolimnology, 30(3): 261-272.
3MPond	Pellatt, M., Smith, M., Mathewes, R., Walker, I. and Palmer, S., 2000. Holocene Treeline and Climate Change in the Subalpine Zone near Stoyoma Mountain, Cascade Mountains, Southwestern British Columbia, Canada. Arctic Antarctic and Alpine Research, 32: 73-83.
North Crater Lake	Palmer, S., Walker, I., Heinrichs, M. and Scudder, G., 2002. Postglacial midge community change and Holocene palaeotemperaturereconstructions near treeline, southern British Columbia (Canada). Journal of Paleolimnology, 28(4): 469-490.
Yuanbao loess	Jia, G., Rao, Z., Zhang, J., Li, Z. and Chen, F., 2013. Tetraether biomarker records from a loess-paleosol sequence in the western Chinese Loess Plateau. Front Microbiol, 4: 199.
Fanjingshan	Qiao Y.L., Chen, P.Y., Shen, C.M. 1996. Quantitative construction of vegetation and climate of Fanjingshan section Guizhou during last 10000 years. Geochimica, 25(5), 445-457 (in Chinese with English abstract)
Lake Redon	Pla, S., Catalan, J., 2004. Chrysophyte cysts from lake sediments reveal the submillennial winter/spring climate variability in the northwestern Mediterranean region throughout the Holocene. Climate Dynamics, 24(2-3): 263-278.
Sacred lake	Loomis, S.E., Russell, J.M., Ladd, B., Street-Perrott, F.A. and Sinninghe Damsté, J.S., 2012. Calibration and application of the branched GDGT temperature proxy on East African lake sediments. Earth and Planetary Science Letters, 357-358: 277-288.
Sungan	He, Y., Liu, W., Zhao, C., Wang, Z., Wang, H., Liu, Y., Qin, X., Hu, Q., An, Z. and Liu, Z., 2013. Solar influenced late Holocene temperature changes on the northern Tibetan Plateau. Chinese Science Bulletin, 58(9): 1053-1059.
Schwarzsee ob Soelden	Ilyashuk, E.A., Koinig, K.A., Heiri, O., Ilyashuk, B.P. and Psenner, R., 2011. Holocene temperature variations at a high-altitude site in the Eastern Alps: a chironomid record from Schwarzsee ob Solden, Austria. Quat Sci Rev, 30(1-2): 176-191.
Gahai	He, Y., Liu, W., Zhao, C., Wang, Z., Wang, H., Liu, Y., Qin, X., Hu, Q., An, Z. and Liu, Z., 2013. Solar influenced late Holocene temperature changes on the northern Tibetan Plateau. Chinese Science Bulletin, 58(9): 1053-1059.
Xiangride	Sun, W., Zhao, S., Pei, H. and Yang, H., 2019. The coupled evolution of mid- to late Holocene temperature and moisture in the southeast Qaidam Basin. Chemical Geology, 528: 119282.
Lake Rutundu	Loomis, S.E., Russell, J.M., Verschuren, D., Morrill, C., De, C.G., Sinninghe Damsté, J.S., Olago, D., Eggermont, H., Streetperrott, F.A. and Kelly, M.A., 2017. The tropical lapse rate steepened during the Last Glacial Maximum. Science Advances, 3(1): e1600815.
Qinghai lake	Hou, J., Huang, Y., Zhao, J., Liu, Z., Colman, S. and An, Z., 2016. Large Holocene summer temperature oscillations and impact on the peopling of the northeastern Tibetan Plateau. Geophysical Research Letters, 43(3): 1323-1330.
Hongyuan peat	Zheng, Y., Li, Q., Wang, Z., Naafs, B.D.A., Yu, X. and Pancost, R.D., 2015. Peatland GDGT records of Holocene climatic and biogeochemical responses to the Asian Monsoon. Organic Geochemistry, 87: 86-95.
Tiancai lake	Feng, X., Zhao, C., D'Andrea, W.J., Liang, J., Zhou, A. and Shen, J., 2019. Temperature fluctuations during the Common Era in subtropical southwestern China inferred from brGDGTs in a remote alpine lake. Earth and Planetary Science Letters, 510: 26-36.
Dangxiong wetland	Cheung, M.-C., Zong, Y., Zheng, Z., Liu, Z. and Aitchison, J.C., 2017. Holocene temperature and precipitation variability on the central Tibetan Plateau revealed by multiple palaeo-climatic proxy records from an alpine wetland sequence. The Holocene, 27(11): 1669-1681.
Xiada Co	Li, X., Wang, M. and Hou, J., 2019. Centennial-scale climate variability during the past 2000 years derived from lacustrine sediment on the western Tibetan Plateau. Quaternary International(510): 65-75.
Aweng Co	Li, X., Wang, M., Zhang, Y., Lei, L. and Hou, J., 2017. Holocene climatic and environmental change on the western Tibetan Plateau revealed by glycerol dialkyl glycerol tetraethers and leaf wax deuterium-to-hydrogen ratios at Aweng Co. Quaternary Research, 87(03): 455-467.
Dagze co	Li, X., Liang, J., Hou, J. and Zhang, W., 2015. Centennial-scale climate variability during the past 2000 years on the central Tibetan Plateau. The Holocene, 25(6): 892-899.
Linggo Co	He, Y., Hou, J., Wang, M., Li, X., Liang, J., Xie, S. and Jin, Y., 2020. Temperature Variation on the Central Tibetan Plateau Revealed by Glycerol Dialkyl Glycerol Tetraethers From the Sediment Record of Lake Linggo Co Since the Last Deglaciation. Frontiers in Earth Science, 8.

## Sheet: 3MPond
3M Pond, Canada, Chironomid
Data				Ages
Age (year BP)	Temperature(°C)			Depth(cm)	Material dated	14C age (yr BP)	14C error(yr)
-275	8.3348			25	conifer needles	3530	60
91	6.8828			45	Mazama Ash	6730	n.a.
458	7.66			66	conifer needles	10000	320
824	8.1993
1190	7.8974
1556	8.3263
1922	6.085
2289	8.1341
2655	5.6899
3021	8.4819
3387	8.8158
3754	7.341
4303	7.8689
4486	7.7936
4852	11.3801
5218	10.9372
5585	11.2145
5951	12.1222
6317	14.1295
6683	12.3885
7050	11.2471
7416	11.6844
7782	13.9177
8148	13.6738
8514	12.5541
8881	12.9805
9247	13.0356
9613	11.1135
9979	13.46
10346	13.4879
10712	13.1262
11078	12.4056
11444	12.5472
11810	10.5644

## Sheet: Ajax Bog
Ajax Bog, New Zealand, Pollen
Data					Ages
Age (year BP)	Temperature(°C)				Depth (cm)	14C age (yr BP)	14C error(yr)
784.667	7.69122				0	-27	0
970.333	7.56202				70	661	61
1156	7.06313				100	1256	48
1328.9	7.37827				300	4102	66
1501.8	7.40005				400	7152	66
1674.7	7.61357				470	9500	75
1847.6	7.86718				525	10700	100
2020.5	7.58476
2193.4	8.1267
2366.3	7.68745
2539.2	7.64231
2712.1	8.25809
2885	8.34259
3057.9	8.24735
3230.8	7.99695
3403.7	8.14197
3576.6	7.99623
3749.5	8.18894
3922.4	8.34547
4095.3	8.1336
4268.2	8.121
4441.1	8.30293
4614	8.07017
4941.9	8.08654
5269.8	8.5775
5597.7	7.83762
6253.5	8.20054
6581.4	7.79735
6909.3	8.33981
7237.2	8.14648
7565.1	7.78637
7893	9.11952
8295.71	8.98003
8698.43	8.98488
9101.14	9.08332
9503.86	10.0847
9906.57	8.61463
10309.3	9.65113
10712	9.11977
11062	9.2696
11412	9.39084
11762	9.14456
12112	8.98936
12462	9.08712
12812	9.19216
13162	8.90839
13512	8.0854
13862	8.61858
14212	7.99948

## Sheet: Akvaquak
Lake Akvaquak, Eastern Baffin Island, Pollen
Data					Ages
Age (year BP)	Temperature(°C)				Depth (cm)	Material dated	14C age (yr BP)	14C error(yr)	Calibrated date(yr BP)	1σ error
10	7.06				11.5	Macroflora	1000	50	933	30.5
30	6.665				11.5	Humic acids	1700	45	n.a.	n.a.
51	6.73				23.5	Humic acids	2510	45	1915	36
71	6.682				31.5	Macroflora	2270	60	2211	34
91	6.627				31.5	Humic acids	2840	55	n.a.	n.a.
111	7.191				43.5	Humic acids	4290	50	4117	41
131	7.268				63.5	Humic acids	6810	55	7214	56
152	7.29				83	Humic acids	7670	60	n.a.	n.a.
172	6.644				83	Macroflora	7330	95	8113	92.5
192	6.82				142.5	Macroflora	8560	100	9550	84
212	6.981
233	7.275
253	7.081
273	7.079
283	7.009
486	7.859
730	7.404
974	7.752
1213	6.996
1444	7.288
1667	7.788
1882	7.282
2085	6.622
2310	7.096
2613	7.196
3002	7.615
3430	7.421
3883	7.439
4350	7.352
4824	7.162
5294	7.579
5754	9.402
6195	7.869
6607	6.914
6969	8.268
7237	9.256
7449	8.59
7626	8.7
7775	6.857
7906	7.596
8025	7.301
8135	6.868
8237	6.584
8334	6.601

## Sheet: Andy
Lake Andy, Central Mackenzie Mountains, Pollen
Data					Ages
Age (year BP)	Temperature(°C)				Depth (cm)	Material dated	14C age (yr BP)	14C error(yr)	Calibrated date(yr BP)
0	0				25	gyttja	2340	200	2340
295	0.5				90	gyttja	4800	70	5530
506	4.4				125	gyttja	6290	100	7200
660	0.3				165	clayey/gyttja	10460	390	12370
849	0.5				240	wood frags	12060	80	14070
1092	0.367
1317	3.367
1814	0.5
2358	4.4
2665	0.5
2830	4.4
3047	2.067
3205	2.467
3322	6.267
3417	4.3
3511	5.2
3622	4.4
3745	6.267
3867	0.4
3991	3.067
4121	5.9
4273	3.1
4518	0.367
4811	3.7
4994	5.9
5338	4.1
5546	3.1
5750	3.1
5986	2.367
6250	4.4
6433	7.233
6683	7.233
6934	5.1
7226	5.567
7344	3.867
7450	5.533
7544	5.9
7638	6.133
7748	5.6
7875	3.167
7986	2.333
8103	5.867
8244	5.067
8361	5.867
8463	5.667
8568	5.1
8725	5.667
9033	0.9
9322	3.9
9529	7.333
9803	1.367
10223	16.933
10505	9.367
10804	9.233
11224	16.8
12093	17.033
13192	1.433

## Sheet: Aweng Co
Lake Aweng Co, Tibet Plateau, China, bGDGTs
Data						Ages
Age (year BP)	Temperature(°C)					Depth (cm)	Material Dated	14C age (yr BP)	14C error(yr)	Calibrated age (yr BP)	1σ error	Reservoir age
-46	6.6					82.5	Bulk sediment	4635	25	594	64	4066
-12	6.3					130	Bulk sediment	5180	20	1057	103	4066
116	6.3					280.5	Bulk sediment	6370	25	2534.5	220.5	4066
192	4.6					328	Bulk sediment	6430	30	3485.5	171.5	3227
260	6.5					380.5	Bulk sediment	7880	35	5306	260	3227
345	6					427	Bulk sediment	9710	30	7278.5	219.5	3227
411	4.6					566	Bulk sediment	13895	40	11654.5	1108.5	3227
495	3.9
525	4
609	4
652	3.2
744	3.6
835	4.4
925	3
1014	3.8
1114	3.2
1198	3.8
1303	4
1395	2.9
1511	2.6
1616	2.5
1720	2.8
1825	2.4
1919	2.3
2190	1.2
2243	3.2
2511	1.9
2565	1.4
2871	0.6
3055	1.4
3219	-2.2
3420	-3.2
3671	-2.1
4079	-4.6
4444	-5
4772	-4
5178	-3.6
5565	-2.8
5979	-2.9
6408	2.1
6581	0.9
6801	0.1
7236	-0.1
7576	4.1
7945	4.5
8285	3.8
8600	-1.7
8972	4.7
9325	6.4
9668	3.9
10014	4.1
10321	3.7
10704	3.7
11051	2.9
11404	3.2
11755	1.9
12100	-3

## Sheet: Balikun
Lake Balikun, Traim Basin, China, UK'37
Data					Ages
Age (year BP)	Temperature(°C)				Depth(cm)	Material Dated	δ13C(‰)	14C age (yr BP)	14C error(yr)	Calibrated age (yr BP)	2σ error	Rseservoir-corrected 14C age by 790 yr
1779.44	20.0016				197	Bulk clay	-23.5	3420	30	2802	74	2630
1872.54	18.2555				238	Bulk clay	-20.6	4690	30	4332.5	85.5	3900
1965.64	20.0348				293	Bulk clay	-19.3	8860	40	8936	157	8070
2151.84	20.3968				437	Charcoal	-11.6	11520	50	12659.5	72.5	10730
2338.04	19.2008				453	Charcoal	-11.3	11480	40	12645.5	69.5	10690
2524.25	21.4931				479	Charred seeds	-16.7	11770	40	12850.5	123.5	10980
2710.45	20.9455				497	Bulk clay	-22.9	12750	50	13811	192	11960
2803.55	18.7734				565	Bulk clay	-21	15630	60	18056.5	189.5	14840
2896.65	21.8211				569	Charred seeds	-10.1	15820	60	18248.5	203.5	15030
3036.3	19.6765				642	Plant macrofossils	-11.8	18150	70	20948.5	253.5	17360
3082.85	22.3698
3222.51	19.0281
3315.61	18.5419
3362.16	21.4599
3455.26	21.8149
3594.91	21.3104
3641.46	22.9151
3733.6	21.0901
3825.74	18.4256
3963.95	21.5476
4010.02	16.7979
4102.15	22.6553
4194.29	19.3931
4432.96	17.8264
4633.88	18.1842
4834.79	21.6291
5035.71	20.6101
5236.63	22.8222
5437.55	18.9815
5638.46	22.1112
5828.1	22.3155
6006.47	24.3024
6184.84	20.7859
6363.2	23.4653
6452.38	21.7547
6630.75	22.3228
6719.93	26.9945
6987.48	21.9545
7076.66	22.8728
7344.21	22.5437
7433.39	26.2399
7611.76	25.3655
7790.12	26.361
7968.49	28.2875
8146.86	19.4774
8325.22	18.9833
8503.59	20.0743
8681.95	18.4302
8860.32	20.0565
8977.24	20.3011
9032.72	19.755
9115.95	17.6637
9144.29	17.9161
9200.99	18.6542
9257.69	18.9257
9314.38	17.7883
9371.08	17.9806
9456.13	18.557
9767.96	19.2622
9824.66	21.2424
9938.05	21.6055
10051.4	21.6948
10164.8	20.5128
10278.2	21.6948
10391.6	19.0873
10448.3	18.0712
10505	25.6989
10561.7	18.4908
10675.1	21.6655
11185.4	23.7551
11752.4	20.6686
12092.5	21.1618
12546.1	23.3249
12658.9	26.3674
12703.4	20.4534
12747	24.5385
12790.6	19.2488
13133	20.9752
14080.6	21.3625
14350.1	21.8025
14889.2	20.4404
15158.8	18.1447
15428.3	17.7372
15967.4	17.0577
16237	18.5793
16506.6	18.142
17045.7	17.6476
18104.5	17.1955
18288.2	16.9268
18447	18.2786
18764.7	16.8026
18923.5	15.2187
19082.3	14.8378
19241.1	18.811
19400	15.053
19558.8	13.9984
19717.6	16.6944
19876.4	19.7939
20035.3	18.2565
20194.1	18.0549
20352.9	17.4161
20511.7	16.7457
20670.6	18.7436
20829.4	21.7697

## Sheet: Baiyinchagan
Lake, Baiyinchagan, northern China, pollen
Data					Ages
Age (year BP)	Temperature(°C)				Depth (cm)	Material dated	14C age (yr BP)	14C error(yr)	Calibrated date(yr BP)	2σ error
739.49	18.9958				1	Total organic carbon	570	50	584	64
855.64	19.3252				35	TOC	3570	60	3841	148
962.11	19.6912				41	TOC	3830	70	4246	172
1029.86	20.0206				47	TOC	5270	50	6023.5	98.5
1146.01	20.3683				77	TOC	7040	80	7829	144
1378.31	20.5696				149	TOC	9760	130	11066	373
1504.14	20.7526				149	Potamogeton seeds	10800	100	12876	251
1610.61	21.1003				179	TOC	10500	140	12421	487
1668.69	21.4114				179	Potamogeton seeds	12030	110	14068	269
1726.76	21.6493
1900.99	21.3748
2026.81	21.814
2191.36	21.2284
2326.87	20.5147
2481.73	20.6977
2675.32	20.3683
2791.47	20.167
2907.62	19.9291
2985.05	20.0938
3159.27	19.801
3391.57	19.6546
3527.08	19.7827
3710.98	19.7095
3943.28	20.0023
4088.47	19.7644
4223.98	19.9474
4503.14	19.6487
4691.97	19.4608
4865.9	19.2917
5323.08	19.2071
5566.58	19.038
5750.45	18.897
5988.98	18.6903
6197.7	19.038
6316.96	18.8782
6421.32	18.7843
6590.28	18.4836
6734.39	18.3709
6977.89	18.9252
7156.79	19.5078
7385.38	19.3574
7603.25	19.631
7754.8	19.8134
7809.91	20.686
7871.91	21.5847
7920.13	22.6006
7927.02	23.7337
7961.46	24.3719
8016.57	25.0882
8092.34	24.6324
8126.79	23.9942
8181.9	23.0955
8223.23	22.5615
8257.67	21.6628
8299	21.0507
8388.56	21.4675
8450.55	22.1447
8471.22	22.9262
8519.44	23.6816
8650.32	24.1505
8745.12	23.8168
8828.17	24.024
8917.86	23.8544
8967.59	24.2585
9058.43	24.5161
9343.92	24.0745
9389.34	23.6942
9473.69	23.228
9538.57	22.909
9635.9	23.3875
9707.27	23.9273
9759.18	24.6143
9811.08	25.338
9908.41	24.9209
9979.78	25.0068
10057.6	24.5775
10103.1	23.9886
10142	23.1789
10258.8	22.1116
10375.6	22.4797
10395	22.8845
10434	23.3752
10498.9	22.5656
10635.1	22.2711
10680.5	21.4247
10784.3	20.8113
10830.6	19.5432
10894.6	18.1737
11082.4	17.8018
11132.8	18.2779
11226.3	18.7949
11327.1	18.2915
11435	18.0195
11528.6	18.3732
11622.1	18.6453
11744.4	18.4684
11866.7	18.9174
12017.8	18.3188
12125.8	17.5569
12240.9	18.3188

## Sheet: Bangeojin
A former lake, Bangeojin,east coast of Korea, pollen
Data					Ages
Age (year BP)	Temperature(°C)				Depth (cm)	Material dated	14C age (yr BP)	14C error(yr)	Calibrated date(yr BP)	2σ error
51.6176	8.92917				100	Peat	770	90	716	24
155.216	8.30208				300	Peat	2350	100	2416	235.5
251.545	7.38542				500	Peat	4060	120	4568	308.5
317.884	6.62292
525.082	7.30208
613.232	7.62292
675.936	8.43125
753.181	8.28542
824.973	8.5125
895.856	8.73958
1002.18	8.70833
1129.41	7.71458
1264.81	6.625
1413.85	5.69792
1470.19	6.12083
1534.71	7.1625
1654.67	7.42292
1669.21	9.14792
1669.21	8.26875
1782.81	8.87083
1853.69	8.25208
1939.11	8.07292
2052.71	7.65
2123.59	8.95208
2229.92	7.12917
2258.09	8.025
2329.88	9.5
2471.65	9.71667
2598.87	10.0417
2684.3	8.62708
2805.16	9.11458
2890.59	9.84583
3004.18	8.725
3124.14	10.1062
3188.66	9.32708
3323.16	9.26042
3564.89	9.99375
3763	9.65208
3870.23	8.07292
3976.55	9.40833
4096.51	9.9125
4317.34	8.73958
4409.12	9.92917
4472.74	9.19583
4537.26	8.5125
4721.74	8.73958
4856.23	8.44792

[truncated: 137 more sheets: Banks Island -12, Basin Pond, BC01, Beringia A, Beringia B, Beringia C, Beringia D, Berkut, Bjornfjelltjorn, Braya Sø, Breitnau-Neuhof, Brurskardstjorni, Burial Lake, Chuna Lake, Clarks Junction, Clear Pond, Congo River Basin, Conroy Lake, Dagze Co, Daihai …]
