# Supplementary material for: Amplification of Elevation-Dependent Temperature Variability Since the Last Glacial Maximum
Source: Research Square preprint supplement (doi:10.21203/rs.3.rs-622682/v1), 2021-08-10
Supplement: Supplementary file 2 [file f3774cbf2ab7c44bdc705994.xlsx]

## Sheet: TEMPERATURE STACKS
Global stacks for LGM-HTM									Global stacks for HTM-LATE HOL											Global stacks for MCA-LIA
Age (cal. B.P.)	0-1km	1σ uncertainty (°C)	1-2km	1σ uncertainty (°C)	2-3km	1σ uncertainty (°C)	3-4km	1σ uncertainty (°C)	Age (cal. B.P.)	0-1km	1σ uncertainty (°C)	1-2km	1σ uncertainty (°C)	2-3km	1σ uncertainty (°C)	3-4km	1σ uncertainty (°C)	>4km	1σ uncertainty (°C)	Age (cal A.D.)	0-1km	1σ uncertainty (°C)	1-2km	1σ uncertainty (°C)	2-3km	1σ uncertainty (°C)	3.5-4.5 km	1σ uncertainty (°C)
5000	1.515	0.732	1.99	0.698	1.139	0.58	1.836	1.917	0	-0.462	0.322	-1.133	0.653	-1.114	0.174	-0.36		1.88309	2.4572	0
5030	1.507	0.736	1.98	0.691	1.144	0.58	1.663	1.963	30	-0.53	0.318	-1.109	0.58	-1.064	0.147	-0.49	0.001	1.84929	2.38192	10					-0.267	0.88
5060	1.504	0.742	1.97	0.684	1.148	0.581	1.536	2.004	60	-0.522	0.318	-1.007	0.509	-0.925	0.139	-0.36	0.186	1.80769	2.3037	20					-0.457	0.823
5090	1.509	0.749	1.96	0.678	1.153	0.58	1.476	2.012	90	-0.475	0.326	-0.927	0.466	-0.892	0.126	-0.46	0.326	1.8138	2.26252	30					-0.249	0.708
5120	1.521	0.75	1.92	0.679	1.159	0.579	1.326	2.079	120	-0.432	0.321	-0.852	0.435	-0.86	0.123	-0.2	0.396	1.74954	2.18067	40					-0.392	0.76
5150	1.53	0.754	1.89	0.688	1.164	0.577	1.201	2.131	150	-0.427	0.281	-0.831	0.432	-0.83	0.131	0	0.49	1.72182	2.15135	50					-0.508	0.844
5180	1.535	0.761	1.88	0.693	1.169	0.576	1.28	2.037	180	-0.445	0.287	-0.723	0.426	-1.011	0.266	0.06	0.557	1.76394	2.15345	60	0.046	0.456	0.0308544	0.292	-0.45	0.797
5210	1.543	0.766	1.89	0.699	1.175	0.574	1.296	2.01	210	-0.435	0.269	-0.62	0.448	-0.987	0.278	0.16	0.692	1.77683	2.14485	70	0.045	0.45	0.0316366	0.289	-0.41	0.76
5240	1.554	0.769	1.9	0.701	1.18	0.574	1.212	2.08	240	-0.438	0.264	-0.569	0.498	-1.107	0.319	0.26	0.853	1.6075	1.51946	80	0.045	0.445	0.0324545	0.285	-0.393	0.739
5270	1.566	0.772	1.9	0.698	1.186	0.573	1.258	2.052	270	-0.447	0.262	-0.51	0.578	-1.075	0.341	0.37	1.025	1.61603	1.53057	90	0.044	0.44	0.0351765	0.279	-0.415	0.745
5300	1.573	0.772	1.89	0.693	1.191	0.573	1.478	1.884	300	-0.416	0.277	-0.477	0.66	-1.071	0.339	0.35	1.113	1.5816	1.50618	100	0.038	0.435	0.0393795	0.273	-0.21	0.658
5330	1.58	0.773	1.88	0.689	1.197	0.573	1.66	1.744	330	-0.419	0.271	-0.513	0.611	-1.082	0.325	0.2	1.138	1.57611	1.49632	110	0.032	0.43	0.0393366	0.267	-0.208	0.619
5360	1.591	0.773	1.86	0.686	1.202	0.574	1.863	1.639	360	-0.417	0.263	-0.537	0.598	-1.087	0.314	0.07	1.145	1.51179	1.36671	120	0.019	0.425	0.0490621	0.263	-0.077	0.544
5390	1.601	0.774	1.84	0.685	1.207	0.575	2.091	1.56	390	-0.412	0.27	-0.552	0.594	-1.077	0.312	-0.1	1.144	1.43038	1.24967	130	0.005	0.422	0.0575056	0.258	-0.032	0.54
5420	1.604	0.774	1.8	0.69	1.212	0.576	2.374	1.414	420	-0.405	0.269	-0.572	0.565	-1.066	0.301	-0.27	1.158	1.35998	1.14632	140	-0.002	0.42	0.0645378	0.254	-0.094	0.588
5450	1.598	0.771	1.76	0.695	1.217	0.577	2.632	1.393	450	-0.374	0.297	-0.591	0.536	-1.075	0.286	-0.45	1.194	1.29196	0.992929	150	-0.004	0.419	0.0826637	0.245	-0.181	0.623
5480	1.588	0.77	1.78	0.682	1.221	0.578	2.798	1.384	480	-0.374	0.296	-0.609	0.502	-1.096	0.275	-0.54	1.153	1.33548	0.86706	160	-0.006	0.418	0.101027	0.237	-0.031	0.498
5510	1.573	0.771	1.8	0.664	1.226	0.579	3.06	1.324	510	-0.384	0.277	-0.622	0.472	-1.12	0.266	-0.68	1.069	1.35949	0.785399	170	0.057	0.411	0.119269	0.229	0.051	0.439
5540	1.558	0.773	1.82	0.654	1.23	0.58	3.348	1.239	540	-0.386	0.261	-0.618	0.456	-1.148	0.259	-0.91	1.046	1.34945	0.738052	180	0.052	0.41	0.12864	0.223	-0.058	0.499
5570	1.54	0.772	1.84	0.641	1.235	0.58	3.425	1.22	570	-0.382	0.247	-0.621	0.441	-1.173	0.25	-1.02	1.055	1.30373	0.669677	190	0.043	0.406	0.135925	0.219	-0.247	0.604
5600	1.523	0.767	1.89	0.619	1.239	0.581	3.551	1.317	600	-0.38	0.248	-0.637	0.422	-1.194	0.244	-0.98	0.987	1.38579	0.595169	200	0.031	0.402	0.14665	0.214	-0.255	0.61
5630	1.51	0.766	1.93	0.603	1.244	0.581	3.632	1.378	630	-0.379	0.252	-0.63	0.415	-1.216	0.241	-1.03	0.883	1.42714	0.550262	210	0.025	0.396	0.145207	0.214	-0.089	0.507
5660	1.496	0.763	1.98	0.581	1.248	0.582	3.736	1.451	660	-0.375	0.261	-0.606	0.42	-1.228	0.231	-1.12	0.776	1.43026	0.537161	220	0.021	0.388	0.147198	0.213	-0.212	0.607
5690	1.484	0.76	2.03	0.56	1.252	0.582	3.657	1.397	690	-0.385	0.274	-0.588	0.429	-1.233	0.219	-1.14	0.725	1.47742	0.560541	230	0.012	0.381	0.145605	0.214	-0.319	0.7
5720	1.475	0.76	2.08	0.543	1.256	0.583	3.623	1.38	720	-0.409	0.257	-0.518	0.507	-1.232	0.214	-1.18	0.688	1.5553	0.585018	240	0.004	0.377	0.138942	0.221	-0.493	0.83
5750	1.47	0.75	2.12	0.53	1.26	0.583	3.69	1.34	750	-0.431	0.26	-0.511	0.502	-1.237	0.219	-1.2	0.718	1.62092	0.590998	250	0	0.368	0.130305	0.23	-0.44	0.723
5780	1.471	0.731	2.13	0.526	1.264	0.583	3.695	1.233	780	-0.421	0.245	-0.494	0.501	-1.249	0.23	-1.29	0.744	1.59337	0.629455	260	0.001	0.359	0.122295	0.239	-0.46	0.704
5810	1.476	0.718	2.16	0.511	1.268	0.583	3.715	1.21	810	-0.376	0.256	-0.523	0.48	-1.233	0.24	-1.36	0.805	1.59292	0.640528	270	-0.001	0.345	0.115488	0.248	-0.354	0.655
5840	1.465	0.711	2.23	0.497	1.271	0.583	3.803	1.224	840	-0.382	0.255	-0.548	0.469	-1.212	0.255	-1.39	0.906	1.57546	0.674424	280	-0.002	0.33	0.109608	0.257	-0.419	0.695
5870	1.456	0.705	2.28	0.498	1.275	0.582	3.931	1.177	870	-0.376	0.251	-0.549	0.473	-1.191	0.272	-1.44	0.9	1.57224	0.714462	290	0.003	0.318	0.102071	0.267	-0.516	0.73
5900	1.446	0.701	2.32	0.503	1.277	0.582	4.015	1.089	900	-0.393	0.227	-0.542	0.503	-1.165	0.288	-1.55	0.925	1.60686	0.718734	300	0.008	0.308	0.109289	0.264	-0.539	0.734
5930	1.445	0.697	2.35	0.51	1.28	0.581	4.073	0.99	930	-0.392	0.217	-0.582	0.486	-1.14	0.299	-1.38	0.768	1.61331	0.72259	310	0.012	0.302	0.118262	0.26	-0.51	0.712	0.31	0.854
5960	1.448	0.688	2.38	0.519	1.282	0.58	4.168	0.929	960	-0.371	0.227	-0.614	0.465	-1.115	0.309	-1.2	0.65	1.6398	0.732139	320	0.019	0.296	0.123544	0.258	-0.363	0.627	0.424	0.858
5990	1.45	0.681	2.39	0.528	1.285	0.579	4.181	0.793	990	-0.386	0.215	-0.628	0.437	-1.095	0.317	-1.11	0.607	1.53664	0.690119	330	0.022	0.288	0.149905	0.237	-0.358	0.616	0.656	0.893
6020	1.455	0.675	2.41	0.537	1.289	0.58	4.304	0.754	1020	-0.372	0.216	-0.656	0.425	-1.071	0.327	-1.13	0.575	1.20785	0.652843	340	0.024	0.282	0.172082	0.22	-0.433	0.684	0.865	1.076
6050	1.455	0.669	2.42	0.545	1.296	0.582	4.065	0.624	1050	-0.376	0.216	-0.672	0.407	-1.053	0.337	-1.19	0.565	1.04579	0.695149	350	0.019	0.277	0.19629	0.2	-0.42	0.686	1.013	1.13
6080	1.46	0.666	2.44	0.555	1.304	0.585	4	0.593	1080	-0.371	0.229	-0.694	0.404	-1.046	0.35	-0.96	0.419	0.936757	0.742532	360	0.041	0.268	0.221325	0.181	-0.07	0.437	1.163	1.132
6110	1.467	0.661	2.47	0.568	1.312	0.588	3.971	0.487	1110	-0.367	0.241	-0.705	0.4	-1.123	0.35	-0.68	0.204	0.758143	0.811599	370	0.046	0.266	0.248387	0.161	0.236	0.397	1.14	1.143
6140	1.479	0.661	2.48	0.58	1.32	0.591	3.982	0.471	1140	-0.36	0.246	-0.719	0.396	-1.116	0.359	-0.55	0.101	0.700111	0.861375	380	0.042	0.265	0.27172	0.144	0.591	0.646	1.111	1.08
6170	1.486	0.662	2.5	0.581	1.327	0.594	3.83	0.463	1170	-0.359	0.255	-0.717	0.394	-1.101	0.369	-0.34	0.276	0.608995	0.907848	390	0.038	0.262	0.284116	0.136	0.429	0.572	0.942	0.911
6200	1.495	0.663	2.5	0.59	1.335	0.596	3.771	0.457	1200	-0.35	0.255	-0.682	0.381	-1.082	0.375	-0.17	0.492	0.523504	0.978207	400	-0.053	0.305	0.296339	0.128	-0.038	0.438	0.561	0.608
6230	1.5	0.662	2.5	0.592	1.342	0.598	3.681	0.425	1230	-0.352	0.25	-0.647	0.381	-1.064	0.382	-0.21	0.647	0.338768	1.02771	410	-0.025	0.279	0.306897	0.123	-0.384	0.603	0.447	0.282
6260	1.506	0.662	2.49	0.589	1.348	0.601	3.482	0.323	1260	-0.353	0.248	-0.661	0.382	-1.047	0.389	-0.26	0.824	0.251436	1.05167	420	0.001	0.258	0.307705	0.122	-0.468	0.661	0.183	0.173
6290	1.517	0.662	2.48	0.588	1.355	0.603	3.112	0.112	1290	-0.358	0.237	-0.681	0.393	-1.02	0.391	-0.11	0.845	0.22923	1.06424	430	0.014	0.247	0.307673	0.122	-0.466	0.653	0.064	0.203
6320	1.523	0.664	2.46	0.576	1.362	0.605	3.074	0.149	1320	-0.371	0.231	-0.714	0.412	-0.989	0.385	0.06	0.839	0.174061	1.02896	440	0.036	0.246	0.309227	0.121	-0.351	0.564	0.125	0.089
6350	1.532	0.662	2.51	0.592	1.37	0.608	3.095	0.233	1350	-0.376	0.23	-0.704	0.426	-0.962	0.376	0.18	0.833	0.0962198	0.996316	450	0.055	0.257	0.317383	0.119	-0.327	0.543	-0.083	0.095
6380	1.55	0.659	2.55	0.597	1.377	0.611	3.218	0.261	1380	-0.374	0.229	-0.722	0.431	-0.934	0.371	0.25	0.878	0.0501385	0.958771	460	0.069	0.272	0.329177	0.118	-0.478	0.637	-0.425	0.287
6410	1.563	0.659	2.58	0.6	1.385	0.613	3.407	0.29	1410	-0.383	0.225	-0.733	0.432	-0.907	0.368	0.19	0.895	-0.10137	0.952989	470	0.061	0.282	0.33751	0.119	-0.488	0.634	-0.559	0.38
6440	1.574	0.657	2.59	0.606	1.392	0.616	3.527	0.297	1440	-0.371	0.223	-0.739	0.442	-0.879	0.365	0.03	0.758	-0.218466	0.96334	480	0.052	0.287	0.361337	0.125	-0.413	0.578	-0.204	0.176
6470	1.583	0.65	2.64	0.611	1.399	0.619	3.611	0.289	1470	-0.37	0.227	-0.747	0.449	-0.848	0.361	-0.09	0.656	-0.331584	0.947451	490	0.05	0.286	0.380239	0.134	-0.292	0.508	0.042	0.08
6500	1.599	0.647	2.69	0.622	1.407	0.621	3.682	0.288	1500	-0.375	0.232	-0.716	0.428	-0.822	0.358	-0.21	0.597	-0.350082	0.896729	500	0.08	0.279	0.404501	0.149	-0.408	0.57	0.16	0.123
6530	1.622	0.649	2.72	0.628	1.414	0.624	3.736	0.27	1530	-0.355	0.233	-0.704	0.424	-0.792	0.353	-0.35	0.521	-0.513171	0.979306	510	0.09	0.275	0.428367	0.166	-0.371	0.57	0.141	0.07
6560	1.633	0.648	2.73	0.617	1.422	0.627	3.894	0.286	1560	-0.365	0.23	-0.695	0.408	-0.764	0.348	-0.44	0.486	-0.457165	0.948035	520	0.08	0.272	0.454118	0.187	-0.32	0.572	0.153	0.123
6590	1.644	0.648	2.73	0.6	1.429	0.629	3.871	0.267	1590	-0.365	0.224	-0.675	0.422	-0.741	0.345	-0.48	0.391	-0.393388	0.903349	530	0.073	0.276	0.479155	0.209	-0.214	0.513	0.133	0.25
6620	1.64	0.654	2.74	0.596	1.436	0.632	3.786	0.332	1620	-0.372	0.222	-0.685	0.424	-0.718	0.342	-0.59	0.297	-0.308873	0.862216	540	0.073	0.285	0.476011	0.209	-0.168	0.454	0.075	0.231
6650	1.652	0.673	2.78	0.627	1.443	0.634	3.481	0.138	1650	-0.363	0.219	-0.654	0.433	-0.718	0.317	-0.66	0.281	-0.251295	0.835225	550	0.072	0.305	0.472003	0.208	-0.178	0.439	0.043	0.187
6680	1.658	0.687	2.82	0.671	1.45	0.636	3.208	0.098	1680	-0.35	0.222	-0.627	0.433	-0.709	0.301	-0.71	0.253	-0.434734	1.01479	560	0.072	0.327	0.468731	0.208	-0.236	0.479	0.31	0.217
6710	1.639	0.681	2.86	0.718	1.456	0.638	2.885	0.33	1710	-0.345	0.224	-0.598	0.428	-0.694	0.294	-0.67	0.192	-0.565127	1.1739	570	0.068	0.344	0.452512	0.199	-0.256	0.513	0.489	0.56
6740	1.622	0.674	2.87	0.725	1.461	0.639	2.504	0.513	1740	-0.319	0.219	-0.58	0.432	-0.833	0.369	-0.63	0.12	-0.576449	1.26309	580	0.058	0.371	0.439416	0.192	-0.109	0.493	0.632	0.789
6770	1.609	0.667	2.75	0.605	1.464	0.639	2.139	0.708	1770	-0.28	0.225	-0.587	0.435	-0.82	0.373	-0.55	0.123	-0.306061	1.12977	590	0.048	0.402	0.42184	0.183	-0.082	0.652	0.729	0.818
6800	1.6	0.661	2.69	0.564	1.466	0.638	1.912	0.863	1800	-0.263	0.218	-0.579	0.443	-0.778	0.36	-0.48	0.185	-0.260718	1.18073	600	0.02	0.421	0.405558	0.176	0.062	0.709	0.82	0.845
6830	1.587	0.656	2.66	0.546	1.47	0.638	1.97	0.827	1830	-0.251	0.219	-0.566	0.452	-0.74	0.352	-0.51	0.325	-0.0843392	1.12325	610	-0.019	0.425	0.387354	0.169	0.28	0.667	0.735	0.806
6860	1.565	0.652	2.64	0.54	1.474	0.639	1.895	0.794	1860	-0.25	0.222	-0.552	0.464	-0.711	0.348	-0.58	0.456	0.0617373	1.11315	620	-0.026	0.376	0.370535	0.162	0.588	0.566	0.527	0.481
6890	1.56	0.646	2.57	0.512	1.479	0.639	1.759	0.804	1890	-0.253	0.207	-0.541	0.469	-0.68	0.346	-0.62	0.559	0.0913817	1.17032	630	-0.046	0.367	0.361622	0.159	0.469	0.701	0.043	0.304
6920	1.556	0.636	2.47	0.471	1.484	0.64	1.762	0.715	1920	-0.25	0.203	-0.605	0.477	-0.646	0.344	-0.61	0.644	0.298521	1.11297	640	-0.101	0.37	0.353202	0.157	0.381	0.713	-0.445	0.603
6950	1.547	0.63	2.4	0.446	1.488	0.641	1.858	0.543	1950	-0.249	0.207	-0.613	0.467	-0.609	0.342	-0.49	0.651	0.407909	1.08087	650	-0.102	0.367	0.345856	0.153	0.324	0.656	-0.783	0.955
6980	1.534	0.624	2.34	0.433	1.493	0.642	1.895	0.402	1980	-0.244	0.206	-0.617	0.463	-0.577	0.337	-0.29	0.62	0.409246	1.01984	660	-0.083	0.352	0.339924	0.15	0.277	0.561	-0.792	1.096
7010	1.528	0.616	2.29	0.433	1.498	0.643	1.998	0.192	2010	-0.234	0.194	-0.623	0.459	-0.554	0.325	-0.17	0.581	0.508538	0.971745	670	-0.061	0.331	0.333677	0.147	0.404	0.285	-0.625	1.097
7040	1.534	0.605	2.27	0.444	1.503	0.643	2.011	0.045	2040	-0.23	0.187	-0.665	0.479	-0.54	0.315	-0.07	0.556	0.570155	0.952847	680	-0.018	0.302	0.328939	0.145	0.819	0.331	-0.39	0.908
7070	1.541	0.596	2.25	0.453	1.507	0.644	2.403	0.282	2070	-0.23	0.178	-0.725	0.451	-0.531	0.307	0.02	0.545	0.516445	0.959162	690	0.007	0.298	0.325148	0.143	0.986	0.466	-0.356	0.786
7100	1.537	0.592	2.23	0.462	1.51	0.643	2.215	0.195	2100	-0.235	0.177	-0.681	0.462	-0.518	0.303	0.1	0.548	0.4268	0.930304	700	0.011	0.286	0.321185	0.142	1.084	0.525	-0.199	0.648
7130	1.542	0.588	2.22	0.473	1.507	0.639	2.378	0.35	2130	-0.227	0.178	-0.704	0.444	-0.477	0.318	0.06	0.583	0.359241	0.93214	710	0.016	0.268	0.31767	0.142	1.029	0.471	0.13	0.488
7160	1.556	0.595	2.21	0.487	1.501	0.632	2.49	0.464	2160	-0.231	0.178	-0.73	0.432	-0.419	0.351	0.05	0.594	0.211225	0.904577	720	0.038	0.246	0.312682	0.142	1.088	0.542	0.53	0.295
7190	1.556	0.604	2.19	0.502	1.495	0.625	2.478	0.487	2190	-0.227	0.178	-0.742	0.418	-0.484	0.299	0.02	0.531	0.236151	0.77161	730	0.063	0.222	0.308089	0.143	0.985	0.523	0.941	0.238
7220	1.55	0.603	2.2	0.517	1.495	0.622	2.448	0.495	2220	-0.217	0.18	-0.751	0.408	-0.554	0.25	0.02	0.487	0.310921	0.597145	740	0.082	0.202	0.302955	0.145	0.8	0.491	1.237	0.383
7250	1.547	0.603	2.22	0.531	1.497	0.621	2.409	0.503	2250	-0.212	0.18	-0.745	0.395	-0.617	0.214	0.08	0.466	0.36871	0.452932	750	0.118	0.186	0.294917	0.147	0.729	0.459	0.983	0.418
7280	1.539	0.612	2.23	0.542	1.5	0.621	2.352	0.519	2280	-0.187	0.182	-0.744	0.383	-0.683	0.191	0.04	0.432	0.431335	0.345801	760	0.13	0.176	0.286393	0.15	0.976	0.479	0.845	0.32
7310	1.517	0.621	2.25	0.559	1.507	0.624	2.288	0.534	2310	-0.169	0.193	-0.742	0.377	-0.75	0.186	-0.06	0.413	0.460112	0.295286	770	0.143	0.164	0.278558	0.153	0.799	0.406	0.634	0.384
7340	1.494	0.632	2.25	0.588	1.519	0.63	2.216	0.549	2340	-0.159	0.204	-0.735	0.37	-0.821	0.202	-0.14	0.405	0.491945	0.277224	780	0.153	0.164	0.270889	0.156	0.642	0.357	0.897	0.298
7370	1.489	0.631	2.23	0.617	1.533	0.636	2.119	0.555	2370	-0.156	0.212	-0.719	0.361	-0.899	0.239	-0.12	0.373	0.168497	0.383464	790	0.159	0.162	0.264097	0.16	0.943	0.5	1.079	0.279
7400	1.472	0.643	2.27	0.656	1.531	0.633	2.038	0.563	2400	-0.161	0.212	-0.696	0.351	-0.888	0.247	-0.15	0.348	0.0766077	0.405749	800	0.15	0.171	0.255912	0.162	0.796	0.395	1.173	0.287
7430	1.476	0.644	2.31	0.698	1.521	0.623	1.956	0.536	2430	-0.167	0.206	-0.675	0.342	-0.852	0.229	-0.18	0.322	-0.190799	0.511698	810	0.145	0.189	0.248685	0.162	0.54	0.304	0.837	0.532
7460	1.481	0.638	2.32	0.704	1.51	0.613	2.113	0.582	2460	-0.17	0.198	-0.651	0.332	-0.843	0.218	-0.15	0.305	-0.505318	0.637673	820	0.136	0.205	0.240641	0.164	0.3	0.385	0.509	0.721
7490	1.484	0.632	2.35	0.726	1.498	0.602	2.17	0.543	2490	-0.176	0.196	-0.629	0.325	-0.847	0.218	-0.13	0.314	-0.766561	0.728411	830	0.127	0.234	0.232404	0.163	0.459	0.253	0.519	0.887
7520	1.492	0.635	2.38	0.741	1.486	0.591	2.195	0.534	2520	-0.183	0.197	-0.614	0.324	-0.788	0.192	-0.17	0.344	-1.15023	0.859967	840	0.111	0.263	0.222629	0.162	0.308	0.309	-0.237	1.36
7550	1.528	0.643	2.4	0.75	1.473	0.58	2.225	0.528	2550	-0.182	0.192	-0.595	0.329	-0.713	0.173	-0.11	0.411	-1.38045	0.903396	850	0.09	0.294	0.21313	0.161	0.531	0.251	0.143	1.142
7580	1.552	0.645	2.43	0.761	1.46	0.568	2.243	0.462	2580	-0.181	0.188	-0.582	0.334	-0.636	0.16	-0.04	0.447	-1.62775	1.12209	860	0.084	0.297	0.202278	0.161	0.593	0.284	0.559	0.827
7610	1.524	0.638	2.48	0.777	1.447	0.557	2.243	0.418	2610	-0.182	0.189	-0.561	0.338	-0.548	0.154	0	0.477	-2.57549	1.87892	870	0.054	0.301	0.188529	0.161	0.632	0.337	0.923	0.531
7640	1.492	0.636	2.53	0.788	1.434	0.545	2.242	0.384	2640	-0.181	0.191	-0.546	0.336	-0.467	0.168	0.36	0.813	-2.19301	1.59491	880	0.063	0.252	0.17523	0.162	0.746	0.385	1.256	0.339
7670	1.467	0.642	2.56	0.793	1.421	0.533	2.288	0.383	2670	-0.177	0.191	-0.55	0.338	-0.379	0.2	0.01	0.62	-1.70292	1.33442	890	0.072	0.221	0.159974	0.163	0.843	0.417	1.352	0.349
7700	1.443	0.651	2.56	0.774	1.409	0.521	2.277	0.313	2700	-0.18	0.193	-0.533	0.363	-0.286	0.246	0	0.728	-1.27308	1.05883	900	0.1	0.177	0.148819	0.163	0.755	0.387	1.332	0.327
7730	1.413	0.661	2.61	0.812	1.396	0.509	2.315	0.285	2730	-0.185	0.196	-0.557	0.388	-0.197	0.304	0.04	0.787	-0.784047	0.799152	910	0.112	0.159	0.137642	0.163	0.732	0.375	1.17	0.354
7760	1.386	0.673	2.65	0.854	1.384	0.497	2.313	0.274	2760	-0.186	0.198	-0.58	0.429	-0.201	0.272	0	0.73	-0.361271	0.525163	920	0.132	0.159	0.124571	0.162	0.904	0.467	0.978	0.39
7790	1.368	0.679	2.69	0.897	1.372	0.486	2.332	0.26	2790	-0.181	0.199	-0.532	0.407	-0.2	0.261	-0.04	0.694	-0.278742	0.743265	930	0.131	0.164	0.117695	0.158	1.007	0.585	0.762	0.465
7820	1.373	0.661	2.73	0.929	1.361	0.474	2.408	0.237	2820	-0.17	0.201	-0.517	0.413	-0.18	0.263	-0.13	0.652	-0.522787	0.841267	940	0.152	0.17	0.110466	0.154	0.607	0.333	0.768	0.415
7850	1.361	0.655	2.77	0.966	1.349	0.462	2.441	0.243	2850	-0.156	0.202	-0.507	0.416	-0.155	0.265	-0.15	0.596	-0.328705	0.469274	950	0.155	0.166	0.103247	0.151	0.545	0.328	0.92	0.311
7880	1.345	0.656	2.8	1.005	1.338	0.451	2.415	0.265	2880	-0.143	0.205	-0.496	0.406	-0.136	0.262	-0.14	0.581	-0.673092	0.680421	960	0.16	0.16	0.0925156	0.149	0.524	0.309	0.919	0.305
7910	1.316	0.656	2.81	1.047	1.325	0.437	2.43	0.29	2910	-0.137	0.204	-0.482	0.401	-0.136	0.255	-0.15	0.547	-0.948233	0.807893	970	0.164	0.161	0.0808775	0.148	0.559	0.349	1.102	0.357
7940	1.287	0.658	2.86	1.071	1.308	0.421	2.462	0.339	2940	-0.136	0.203	-0.455	0.397	-0.133	0.248	-0.21	0.522	-1.33238	0.907418	980	0.168	0.164	0.0729009	0.148	0.657	0.526	1.497	0.181
7970	1.269	0.653	2.85	1.027	1.293	0.407	2.484	0.402	2970	-0.131	0.202	-0.436	0.401	-0.11	0.245	-0.25	0.542	-1.54399	0.899095	990	0.176	0.174	0.0579497	0.152	0.42	0.284	1.274	0.426
8000	1.249	0.651	2.95	1.105	1.284	0.396	2.526	0.451	3000	-0.128	0.204	-0.421	0.405	-0.086	0.24	-0.23	0.611	-1.76137	0.893501	1000	0.161	0.182	0.0443418	0.155	0.319	0.273	1.326	0.463
8030	1.221	0.651	2.89	1.006	1.275	0.385	2.558	0.506	3030	-0.11	0.209	-0.403	0.414	-0.077	0.234	-0.24	0.688	-1.89045	0.998666	1010	0.168	0.189	0.0316703	0.16	0.302	0.326	1.188	0.284
8060	1.191	0.651	2.82	0.915	1.265	0.374	2.545	0.594	3060	-0.085	0.233	-0.376	0.449	-0.069	0.234	-0.28	0.754	-1.93407	0.988976	1020	0.168	0.194	0.019551	0.165	0.32	0.426	0.77	0.184
8090	1.166	0.652	2.74	0.839	1.255	0.363	2.552	0.668	3090	-0.077	0.235	-0.418	0.405	-0.051	0.24	-0.26	0.793	-1.83589	0.927585	1030	0.143	0.196	0.349776	0.411	0.277	0.537	0.57	0.346
8120	1.166	0.647	2.68	0.794	1.245	0.351	2.577	0.725	3120	-0.081	0.228	-0.383	0.408	-0.033	0.248	-0.19	0.868	-1.82194	0.872561	1040	0.125	0.184	0.328981	0.402	0.734	0.681	0.276	0.637
8150	1.164	0.643	2.56	0.718	1.234	0.339	2.58	0.797	3150	-0.07	0.247	-0.368	0.408	-0.014	0.257	-0.14	0.934	-1.75708	0.829252	1050	0.106	0.169	0.330871	0.411	0.993	0.861	-0.027	0.873
8180	1.154	0.64	2.43	0.702	1.223	0.327	2.552	0.893	3180	-0.055	0.255	-0.364	0.408	0.003	0.264	-0.03	1.028	-1.86487	0.784808	1060	0.078	0.159	0.278317	0.364	0.891	0.837	-0.144	1.032
8210	1.142	0.639	2.28	0.754	1.211	0.315	2.545	0.979	3210	-0.044	0.251	-0.363	0.41	0.019	0.275	0	1.037	-1.97528	0.76537	1070	0.084	0.156	0.151838	0.249	0.744	0.788	-0.399	1.091
8240	1.127	0.64	2.12	0.869	1.199	0.304	2.545	1.066	3240	-0.041	0.244	-0.333	0.421	0.016	0.29	-0.04	1.122	-2.06173	0.757886	1080	0.093	0.155	0.300428	0.344	0.953	0.875	-0.566	1.168
8270	1.109	0.65	1.96	1.029	1.187	0.292	2.557	1.163	3270	-0.045	0.232	-0.342	0.463	0.029	0.293	-0.08	1.196	-2.09557	0.860251	1090	0.109	0.157	0.222825	0.282	0.823	0.794	-0.719	1.243
8300	1.087	0.658	1.77	1.247	1.176	0.281	2.542	1.274	3300	-0.048	0.232	-0.307	0.43	0.05	0.293	-0.02	1.246	-1.92379	0.876272	1100	0.112	0.164	0.225827	0.257	0.788	0.815	-0.522	0.963
8330	1.054	0.669	1.93	1.065	1.164	0.27	2.476	1.264	3330	-0.035	0.243	-0.231	0.396	0.065	0.294	-0.07	1.308	-1.76041	0.869272	1110	0.133	0.183	0.242516	0.258	0.57	0.682	-0.322	0.91
8360	1.019	0.685	2.12	0.895	1.154	0.26	2.411	1.211	3360	-0.03	0.255	-0.202	0.436	0.079	0.298	-0.27	1.375	-1.57816	0.92327	1120	0.095	0.194	0.271315	0.317	0.478	0.706	-0.259	0.838
8390	1.041	0.683	2.1	0.857	1.152	0.256	2.32	1.204	3390	-0.039	0.243	-0.156	0.464	0.102	0.298	-0.42	1.404	-1.50194	0.917125	1130	0.083	0.213	0.500093	0.442	0.459	0.773	-0.238	0.707
8420	1.035	0.692	2.07	0.835	1.165	0.262	2.226	1.214	3420	-0.04	0.241	-0.137	0.44	0.133	0.296	-0.62	1.478	-1.48383	0.94233	1140	0.042	0.219	0.510155	0.472	0.475	0.955	0.113	0.65
8450	1.007	0.698	2.07	0.835	1.18	0.269	2.208	1.178	3450	-0.049	0.243	-0.113	0.413	0.165	0.296	-0.87	1.584	-1.55677	0.931673	1150	0.049	0.206	0.504443	0.472	0.282	0.835	0.056	0.673
8480	0.979	0.706	2.13	0.838	1.191	0.274	2.182	1.18	3480	-0.041	0.245	-0.071	0.413	0.198	0.295	-1.08	1.647	-1.58786	0.935072	1160	0.042	0.208	0.4439	0.438	0.285	0.79	-0.07	0.693
8510	0.965	0.708	2.11	0.855	1.199	0.276	2.105	1.19	3510	-0.033	0.246	-0.041	0.414	0.227	0.293	-1.15	1.69	-1.61853	0.911198	1170	0.032	0.216	0.402323	0.411	-0.316	0.139	0.024	0.605
8540	0.972	0.699	2.04	0.84	1.205	0.278	2.052	1.168	3540	-0.022	0.267	-0.004	0.419	0.251	0.292	-1.3	1.726	-1.5794	0.888302	1180	0.058	0.22	0.412255	0.409	-0.254	0.226	0.067	0.291
8570	1.003	0.678	1.96	0.814	1.21	0.278	2.009	1.14	3570	-0.007	0.284	0.034	0.43	0.273	0.294	-1.46	1.733	-1.59137	0.868131	1190	0.087	0.225	0.446993	0.428	0.34	0.646	0.366	0.107
8600	1.021	0.662	1.88	0.787	1.215	0.279	1.965	1.167	3600	0.005	0.281	0.055	0.444	0.259	0.307	-1.41	1.813	-1.65665	0.861879	1200	0.114	0.237	0.359191	0.392	0.478	0.76	0.551	0.302
8630	1.046	0.66	1.81	0.755	1.219	0.279	1.756	1.215	3630	0.022	0.285	0.079	0.468	0.241	0.325	-1.65	1.741	-1.79485	0.859905	1210	0.093	0.234	0.230028	0.354	0.27	0.534	0.505	0.522
8660	1.06	0.661	1.75	0.723	1.223	0.278	1.595	1.284	3660	0.028	0.274	0.109	0.504	0.243	0.336	-1.74	1.782	-1.96238	0.840353	1220	0.099	0.235	-0.0325078	0.159	0.533	0.804	0.605	0.344
8690	1.072	0.662	1.69	0.695	1.228	0.278	1.496	1.308	3690	0.034	0.275	0.122	0.524	0.237	0.347	-1.83	1.763	-2.1405	0.812041	1230	0.108	0.223	0.0550343	0.188	0.608	0.868	0.484	0.268
8720	1.088	0.66	1.62	0.673	1.232	0.279	1.333	1.367	3720	0.042	0.282	0.131	0.535	0.22	0.361	-1.78	1.672	-2.39783	0.744946	1240	0.075	0.21	0.0872784	0.204	0.553	0.801	0.359	0.216
8750	1.11	0.654	1.55	0.657	1.237	0.278	1.075	1.471	3750	0.031	0.267	0.151	0.553	0.205	0.372	-2.01	1.822	-2.52536	0.725144	1250	0.061	0.203	-0.0447171	0.156	0.276	0.54	0.498	0.12
8780	1.136	0.652	1.49	0.644	1.241	0.278	0.859	1.569	3780	0.021	0.257	0.097	0.615	0.192	0.383	-1.73	1.552	-2.64988	0.693506	1260	0.052	0.19	-0.189515	0.243	0.256	0.544	0.332	0.069
8810	1.157	0.645	1.42	0.628	1.248	0.28	0.646	1.676	3810	0.017	0.256	0.126	0.561	0.182	0.394	-1.76	1.502	-2.71428	0.689684	1270	0.037	0.179	-0.278775	0.321	0.188	0.55	0.368	0.028
8840	1.167	0.637	1.34	0.61	1.259	0.284	0.424	1.79	3840	0.018	0.234	0.131	0.548	0.165	0.404	-1.74	1.362	-2.79825	0.700214	1280	0.017	0.19	-0.304638	0.255	0.119	0.611	0.433	0.05
8870	1.178	0.633	1.26	0.595	1.265	0.285	0.204	1.902	3870	0.026	0.236	0.113	0.535	0.148	0.417	-1.76	1.273	-2.80957	0.734038	1290	-0.037	0.218	-0.302918	0.182	-0.054	0.621	0.251	0.12
8900	1.192	0.631	1.17	0.592	1.263	0.281	0.063	1.96	3900	0.045	0.24	0.126	0.531	0.119	0.426	-1.77	1.187	-2.76602	0.786748	1300	-0.063	0.266	-0.331252	0.224	0.298	0.654	0.422	0.071
8930	1.21	0.625	1.08	0.579	1.26	0.275	0	1.956	3930	0.063	0.241	0.153	0.528	0.105	0.413	-1.7	1.064	-2.78253	0.831724	1310	-0.03	0.252	-0.348443	0.229	0.105	0.575	0.232	0.042
8960	1.221	0.616	0.99	0.582	1.258	0.27	-0.115	1.962	3960	0.052	0.232	0.157	0.516	0.09	0.402	-1.59	0.959	-2.75477	0.909241	1320	-0.007	0.26	-0.372665	0.219	-0.002	0.508	0.282	0.099
8990	1.224	0.606	0.98	0.577	1.259	0.267	-0.267	2.003	3990	0.046	0.229	0.167	0.509	0.057	0.408	-1.59	0.93	-2.75908	0.979585	1330	0.04	0.217	-0.374709	0.215	0.153	0.604	0.525	0.226
9020	1.216	0.593	0.81	0.82	1.26	0.264	-0.334	2.012	4020	0.047	0.229	0.18	0.499	0.062	0.393	-1.71	0.961	-2.89304	0.966582	1340	0.113	0.231	-0.351286	0.17	0.065	0.543	0.476	0.369
9050	1.219	0.58	0.84	0.772	1.262	0.263	-0.293	1.96	4050	0.049	0.23	0.196	0.5	0.076	0.378	-1.82	0.974	-3.0602	0.946795	1350	0.133	0.24	-0.441889	0.282	-0.332	0.254	0.526	0.483
9080	1.223	0.57	0.87	0.709	1.265	0.261	-0.242	1.896	4080	0.039	0.23	0.217	0.512	0.088	0.365	-1.63	1.058	-3.23891	0.940056	1360	0.123	0.256	-0.775395	0.465	-0.388	0.323	0.304	0.607
9110	1.231	0.556	0.86	0.67	1.269	0.26	-0.211	1.839	4110	0.035	0.23	0.22	0.534	0.107	0.349	-1.43	1.208	-3.39477	0.89142	1370	0.111	0.247	-0.87861	0.517	0.164	0.569	0.08	0.607
9140	1.243	0.544	0.84	0.643	1.272	0.258	-0.195	1.79	4140	0.025	0.236	0.226	0.547	0.119	0.332	-1.35	1.372	-3.56478	0.789462	1380	0.079	0.246	-0.580716	0.296	0.157	0.555	0.187	0.579
9170	1.246	0.528	0.82	0.623	1.276	0.257	-0.146	1.718	4170	0.028	0.242	0.227	0.556	0.144	0.311	-1.23	1.501	-3.68136	0.718187	1390	0.015	0.23	-0.306524	0.155	0.09	0.543	0.086	0.496
9200	1.236	0.511	0.8	0.608	1.281	0.257	-0.016	1.588	4200	0.036	0.246	0.207	0.544	0.178	0.295	-1.11	1.647	-3.75088	0.675961	1400	0	0.22	-0.267731	0.135	0.019	0.565	-0.211	0.46
9230	1.217	0.503	0.77	0.591	1.286	0.257	0.172	1.417	4230	0.038	0.236	0.183	0.532	0.197	0.286	-1.07	1.779	-3.83579	0.630099	1410	-0.043	0.218	-0.190862	0.216	0.125	0.606	-0.571	0.487
9260	1.203	0.502	0.75	0.575	1.292	0.257	0.328	1.269	4260	0.038	0.233	0.157	0.527	0.204	0.275	-1.16	1.86	-3.87263	0.630155	1420	-0.086	0.224	-0.0852968	0.351	0.135	0.585	-0.643	0.431
9290	1.19	0.5	0.73	0.559	1.295	0.256	0.456	1.142	4290	0.043	0.233	0.135	0.518	0.229	0.266	-1.07	1.874	-3.87676	0.638637	1430	-0.107	0.229	-0.177256	0.296	0.059	0.551	-0.788	0.458
9320	1.172	0.501	0.71	0.545	1.298	0.253	0.628	0.983	4320	0.049	0.238	0.119	0.509	0.257	0.27	-0.88	1.825	-3.79477	0.720471	1440	-0.132	0.235	-0.328394	0.229	0.082	0.646	-0.947	0.433
9350	1.158	0.496	0.69	0.532	1.3	0.25	0.728	0.876	4350	0.061	0.239	0.101	0.506	0.228	0.264	-0.73	1.835	-3.71624	0.800219	1450	-0.145	0.24	-0.415595	0.204	0.08	0.73	-0.78	0.521
9380	1.151	0.493	0.68	0.523	1.3	0.247	0.861	0.745	4380	0.059	0.249	0.081	0.503	0.211	0.26	-0.62	1.886	-3.70312	0.843243	1460	-0.113	0.245	-0.419071	0.131	0.063	0.682	-0.839	0.321
9410	1.143	0.494	0.67	0.514	1.301	0.244	0.999	0.612	4410	0.055	0.25	0.073	0.505	0.193	0.259	-0.43	1.842	-3.60396	0.895887	1470	-0.112	0.24	-0.199006	0.232	-0.106	0.487	-0.72	0.44
9440	1.127	0.504	0.65	0.507	1.302	0.24	1.035	0.551	4440	0.059	0.254	0.07	0.516	0.168	0.256	-0.27	1.764	-3.56882	0.908509	1480	-0.132	0.246	-0.0291605	0.36	-0.351	0.292	-0.755	0.521
9470	1.091	0.522	0.63	0.499	1.303	0.237	1.103	0.466	4470	0.06	0.266	0.073	0.516	0.162	0.255	-0.22	1.707	-3.58401	0.916669	1490	-0.143	0.234	-0.141514	0.261	-0.726	0.205	-0.891	0.564
9500	1.078	0.521	0.6	0.493	1.306	0.236	1.286	0.298	4500	0.061	0.261	0.088	0.508	0.168	0.255	-0.12	1.632	-3.51666	0.936682	1500	-0.156	0.227	-0.190317	0.234	-0.831	0.226	-1.078	0.609
9530	1.068	0.517	0.59	0.47	1.31	0.235	1.432	0.154	4530	0.068	0.258	0.106	0.504	0.192	0.251	0.02	1.559	-3.56091	0.934503	1510	-0.192	0.192	-0.273998	0.183	-0.817	0.253	-1.387	0.703
9560	1.064	0.517	0.58	0.447	1.315	0.234	1.379	0.148	4560	0.078	0.254	0.125	0.506	0.239	0.251	0.11	1.482	-3.44942	0.930149	1520	-0.187	0.178	-0.414024	0.12	-0.89	0.232	-1.398	0.764
9590	1.059	0.516	0.57	0.436	1.319	0.234	1.304	0.16	4590	0.079	0.255	0.143	0.514	0.278	0.253	0.13	1.402	-3.24651	0.960651	1530	-0.199	0.177	-0.48453	0.124	-0.884	0.205	-1.517	0.6
9620	1.06	0.505	0.55	0.437	1.323	0.232	1.215	0.24	4620	0.079	0.257	0.144	0.518	0.301	0.25	0.17	1.311	-3.09729	0.97806	1540	-0.262	0.174	-0.474198	0.137	-0.857	0.221	-1.293	0.686
9650	1.054	0.493	0.52	0.445	1.326	0.231	1.203	0.318	4650	0.085	0.27	0.177	0.508	0.344	0.256	0.25	1.21	-3.0887	0.951613	1550	-0.263	0.196	-0.488506	0.162	-0.959	0.299	-1.359	0.54
9680	1.043	0.485	0.52	0.442	1.327	0.228	1.269	0.335	4680	0.099	0.27	0.215	0.508	0.374	0.262	0.33	1.124	-3.04928	0.951446	1560	-0.292	0.195	-0.366621	0.183	-1.138	0.339	-1.001	0.704
9710	1.027	0.489	0.52	0.448	1.327	0.224	1.317	0.343	4710	0.116	0.277	0.239	0.508	0.362	0.244	0.37	1.094	-2.91746	0.998366	1570	-0.272	0.196	-0.29496	0.258	-0.954	0.338	-1.309	0.553
9740	1.017	0.489	0.52	0.46	1.328	0.221	1.368	0.334	4740	0.13	0.285	0.235	0.496	0.346	0.231	0.48	1.013	-2.92203	0.993195	1580	-0.269	0.189	-0.505684	0.191	-1.174	0.366	-1.423	0.625
9770	1.013	0.49	0.51	0.476	1.329	0.218	1.3	0.4	4770	0.15	0.289	0.23	0.492	0.314	0.23	0.54	0.886	-3.00129	0.949071	1590	-0.261	0.196	-0.711587	0.315	-1.072	0.327	-1.54	0.718
9800	1.01	0.486	0.5	0.49	1.331	0.215	1.17	0.504	4800	0.152	0.291	0.224	0.484	0.292	0.24	0.54	0.81	-2.92719	0.961733	1600	-0.257	0.201	-0.514011	0.222	-0.612	0.457	-1.51	0.774
9830	0.998	0.484	0.49	0.502	1.332	0.213	1.03	0.612	4830	0.153	0.294	0.223	0.48	0.304	0.249	0.56	0.715	-2.80669	1.00025	1610	-0.234	0.211	-0.331622	0.381	-0.383	0.655	-1.57	0.794
9860	0.988	0.484	0.49	0.514	1.334	0.21	0.98	0.654	4860	0.139	0.285	0.224	0.481	0.295	0.26	0.63	0.55	-2.83935	0.936348	1620	-0.211	0.224	-0.580328	0.251	-0.574	0.537	-1.718	0.835
9890	0.98	0.487	0.49	0.53	1.335	0.207	0.945	0.684	4890	0.14	0.282	0.221	0.482	0.312	0.259	0.57	0.488	-2.81343	0.917967	1630	-0.218	0.232	-0.640274	0.304	-0.714	0.473	-1.711	0.81
9920	0.982	0.491	0.5	0.552	1.335	0.204	0.914	0.711	4920	0.149	0.28	0.229	0.492	0.345	0.279	0.49	0.431	-2.71664	0.941674	1640	-0.239	0.24	-0.464889	0.259	-0.59	0.608	-1.513	0.865
9950	0.978	0.492	0.48	0.571	1.335	0.2	0.801	0.795	4950	0.16	0.281	0.235	0.503	0.396	0.288	0.49	0.297	-2.60547	0.964694	1650	-0.227	0.241	-0.358759	0.275	-0.949	0.345	-1.409	0.826
9980	0.972	0.497	0.45	0.584	1.335	0.196	0.668	0.801	4980	0.167	0.281	0.237	0.514	0.448	0.289	0.51	0.209	-2.52367	0.976696	1660	-0.253	0.227	-0.496046	0.349	-0.971	0.295	-1.061	0.626
10010	0.971	0.494	0.42	0.597	1.335	0.192	0.848	0.764	5010	0.171	0.283	0.251	0.529	0.507	0.298	0.43	0.243	-2.72311	0.895346	1670	-0.263	0.209	-0.652953	0.42	-0.796	0.259	-0.656	0.436
10040	0.965	0.5	0.39	0.609	1.335	0.189	1.015	0.644	5040	0.177	0.291	0.241	0.519	0.567	0.308	0.33	0.301	-2.68424	0.886826	1680	-0.236	0.194	-0.673169	0.409	-0.43	0.57	-0.08	0.403
10070	0.96	0.502	0.36	0.623	1.336	0.186	1.216	0.502	5070	0.175	0.284	0.214	0.501	0.615	0.301	0.24	0.346	-2.90805	0.857703	1690	-0.228	0.186	-0.633488	0.342	-0.928	0.309	0.126	0.296
10100	0.961	0.498	0.34	0.64	1.338	0.184	1.421	0.357	5100	0.173	0.273	0.187	0.488	0.674	0.313	0.2	0.359	-2.74612	0.923039	1700	-0.207	0.189	-0.474475	0.274	-0.932	0.346	0.085	0.125
10130	0.961	0.483	0.31	0.66	1.341	0.182	1.636	0.209	5130	0.183	0.264	0.167	0.48	0.714	0.32	0.1	0.424	-2.41601	0.99306	1710	-0.162	0.202	-0.346432	0.295	-0.983	0.424	0.09	0.142
10160	0.963	0.467	0.27	0.674	1.343	0.18	1.821	0.089	5160	0.188	0.26	0.152	0.472	0.735	0.315	0.02	0.477	-2.2325	1.0178	1720	-0.151	0.24	-0.338527	0.34	-1.198	0.458	-0.109	0.112
10190	0.966	0.45	0.22	0.684	1.345	0.178	2.059	0.068	5190	0.2	0.261	0.153	0.478	0.726	0.332	0.09	0.42	-2.04669	1.05921	1730	-0.163	0.236	-0.328195	0.3	-0.983	0.442	-0.432	0.066
10220	0.976	0.437	0.18	0.689	1.347	0.176	2.103	0.104	5220	0.208	0.263	0.194	0.493	0.712	0.352	0.12	0.413	-1.85583	1.10825	1740	-0.177	0.204	-0.340624	0.309	-1.014	0.468	-0.544	0.157
10250	0.978	0.427	0.15	0.682	1.349	0.173	2.138	0.127	5250	0.198	0.256	0.224	0.5	0.708	0.366	0.06	0.463	-1.64262	1.17623	1750	-0.18	0.179	-0.463645	0.309	-1.024	0.437	-0.511	0.16
10280	0.985	0.417	0.13	0.665	1.351	0.171	2.118	0.101	5280	0.197	0.25	0.232	0.502	0.698	0.369	0.09	0.441	-1.42646	1.25106	1760	-0.171	0.191	-0.455655	0.303	-0.52	0.553	-0.372	0.269
10310	0.987	0.408	0.11	0.641	1.353	0.169	2.287	0.205	5310	0.205	0.25	0.237	0.51	0.695	0.333	0.24	0.325	-1.24765	1.30945	1770	-0.112	0.21	-0.282165	0.311	-0.637	0.33	-0.309	0.344
10340	0.989	0.399	0.1	0.618	1.355	0.166	2.427	0.302	5340	0.216	0.254	0.253	0.518	0.695	0.298	0.39	0.237	-1.16383	1.3285	1780	-0.024	0.25	-0.0590521	0.375	-0.017	0.453	-0.528	0.267
10370	0.986	0.392	0.09	0.595	1.357	0.163	2.618	0.459	5370	0.224	0.256	0.263	0.528	0.692	0.274	0.54	0.149	-1.13089	1.34131	1790	-0.012	0.239	0.0588478	0.416	-0.053	0.221	-0.575	0.129
10400	0.985	0.386	0.09	0.576	1.358	0.16	2.844	0.631	5400	0.237	0.257	0.271	0.54	0.691	0.257	0.69	0.096	-1.29563	1.31379	1800	-0.021	0.219	0.0451527	0.397	-0.385	0.259	-0.402	0.378
10430	0.979	0.38	-0.31	0.807	1.359	0.157	3.083	0.802	5430	0.243	0.254	0.296	0.577	0.66	0.252	0.92	0.1	-1.58433	1.2379	1810	-0.031	0.237	-0.0588262	0.392	-0.307	0.218	-0.001	0.633
10460	0.972	0.375	-0.1	0.607	1.359	0.152	3.04	0.769	5460	0.246	0.252	0.278	0.562	0.645	0.27	1.06	0.159	-1.95137	1.01895	1820	-0.039	0.262	-0.0494384	0.391	-0.174	0.172	-0.323	0.938
10490	0.96	0.373	0.07	0.534	1.359	0.148	3.068	0.783	5490	0.247	0.254	0.282	0.558	0.63	0.262	1.17	0.202	-2.0709	0.998323	1830	-0.041	0.246	0.0552268	0.385	-0.118	0.226	-0.222	0.957
10520	0.934	0.379	0.15	0.543	1.36	0.144	2.863	0.631	5520	0.246	0.259	0.287	0.558	0.685	0.289	1.32	0.301	-2.11947	1.00022	1840	-0.064	0.242	0.17018	0.405	-0.342	0.308	-0.316	0.757
10550	0.917	0.381	0.22	0.569	1.364	0.143	2.704	0.511	5550	0.235	0.262	0.291	0.551	0.701	0.263	1.45	0.421	-2.16431	0.972393	1850	-0.105	0.258	0.11241	0.381	-0.342	0.377	-0.556	0.663
10580	0.902	0.384	0.27	0.605	1.369	0.141	2.496	0.354	5580	0.239	0.257	0.306	0.551	0.726	0.251	1.58	0.439	-2.08721	0.939999	1860	-0.134	0.27	-0.0885432	0.446	-0.051	0.375	-0.55	0.604
10610	0.886	0.391	0.3	0.645	1.373	0.138	2.389	0.257	5610	0.247	0.259	0.339	0.558	0.746	0.256	1.64	0.431	-1.86789	1.00916	1870	-0.089	0.266	0.00214769	0.394	-0.164	0.271	-0.373	0.65
10640	0.863	0.401	0.3	0.657	1.377	0.134	2.25	0.137	5640	0.252	0.267	0.375	0.561	0.793	0.275	1.73	0.424	-1.59414	1.09613	1880	0.001	0.265	0.0616426	0.377	-0.256	0.283	-0.066	0.781
10670	0.855	0.402	0.11	0.533	1.38	0.129	2.402	0.222	5670	0.265	0.277	0.406	0.559	0.92	0.407	1.72	0.379	-1.32819	1.15513	1890	0.05	0.278	-0.247219	0.183	-0.33	0.325	0.08	0.834
10700	0.837	0.408	-0.14	0.537	1.384	0.123	2.337	0.159	5700	0.259	0.28	0.412	0.548	0.872	0.363	1.7	0.379	-1.14103	1.213	1900	0.002	0.267	-0.279715	0.18	-0.293	0.451	0.002	0.783
10730	0.828	0.412	0.12	0.573	1.387	0.116	2.261	0.098	5730	0.251	0.283	0.426	0.543	0.858	0.338	1.69	0.386	-1.14115	1.17664	1910	0.036	0.277	-0.155349	0.154	-0.31	0.487	-0.168	0.724
10760	0.819	0.419	0.09	0.577	1.391	0.109	1.933	0.134	5760	0.259	0.265	0.428	0.54	0.844	0.319	1.67	0.423	-1.2818	1.07347	1920	0.137	0.33	-0.206912	0.269	-0.368	0.492	-0.357	0.606
10790	0.814	0.425	0.05	0.57	1.395	0.102	1.546	0.409	5790	0.269	0.253	0.422	0.544	0.834	0.314	1.71	0.47	-1.403	0.971826	1930	0.182	0.386	-0.0711905	0.331	-0.078	0.705	-0.623	0.422
10820	0.809	0.435	0.01	0.561	1.4	0.096	1.357	0.544	5820	0.264	0.25	0.425	0.543	0.767	0.352	1.76	0.49	-1.25366	1.03792	1940	0.189	0.39	0.123956	0.297	-0.196	0.677	-0.815	0.353
10850	0.804	0.442	-0.03	0.549	1.405	0.089	1.218	0.642	5850	0.253	0.249	0.461	0.535	0.733	0.384	1.78	0.521	-1.05312	1.12164	1950	0.03	0.31	0.14779	0.249	-0.257	0.656	-0.997	0.446
10880	0.805	0.447	-0.03	0.555	1.41	0.083	1.149	0.69	5880	0.245	0.257	0.494	0.537	0.729	0.413	1.81	0.583	-0.815917	1.18982	1960	-0.046	0.43	0.0607133	0.174	-0.327	0.649	-1.037	0.605
10910	0.802	0.45	-0.04	0.567	1.416	0.077	1.13	0.702	5910	0.278	0.237	0.506	0.533	0.727	0.423	1.87	0.63	-0.604807	1.23928	1970	0.11	0.498	0.104815	0.124	-0.858	0.813	-0.942	0.651
10940	0.792	0.465	-0.06	0.582	1.421	0.071	1.14	0.694	5940	0.29	0.232	0.5	0.534	0.733	0.431	1.98	0.658	-0.582991	1.22493
10970	0.81	0.459	-0.06	0.597	1.427	0.065	1.212	0.641	5970	0.299	0.228	0.46	0.539	0.71	0.454	2.01	0.708	-0.406598	1.36585
11000	0.803	0.459	-0.07	0.611	1.433	0.06	1.484	0.447	6000	0.3	0.234	0.474	0.542	0.723	0.442	2.16	0.727	-0.151806	1.50163
11030	0.811	0.464	-0.07	0.627	1.438	0.058	1.739	0.263	6030	0.316	0.247	0.519	0.556	0.746	0.427	2.1	0.825	0.0190963	1.62255
11060	0.811	0.472	-0.08	0.64	1.442	0.055	2.013	0.065	6060	0.331	0.262	0.521	0.558	0.772	0.418	2.04	0.83	0.293895	1.67621
11090	0.813	0.476	-0.09	0.654	1.443	0.05	2.299	0.144	6090	0.347	0.279	0.517	0.552	0.74	0.416	1.97	0.853	0.511492	1.73534
11120	0.811	0.483	-0.13	0.64	1.439	0.041	1.832	0.175	6120	0.361	0.298	0.516	0.558	0.681	0.406	2.02	0.884	0.768227	1.80077
11150	0.815	0.495	-0.18	0.615	1.433	0.032	1.76	0.209	6150	0.393	0.312	0.51	0.555	0.638	0.388	1.99	0.918	1.06837	1.84618
11180	0.828	0.515	-0.21	0.604	1.428	0.023	1.736	0.211	6180	0.38	0.294	0.509	0.546	0.618	0.357	1.96	0.882	1.25939	1.9021
11210	0.83	0.527	-0.31	0.64	1.423	0.014	1.736	0.22	6210	0.37	0.28	0.519	0.542	0.602	0.339	1.91	0.893	1.38457	1.98187
11240	0.808	0.533	-0.26	0.59	1.418	0.005	1.861	0.162	6240	0.368	0.278	0.536	0.534	0.614	0.36	1.77	0.956	1.46541	2.08308
11270	0.797	0.533	-0.3	0.577	1.412	0.004	1.964	0.098	6270	0.354	0.273	0.541	0.519	0.631	0.377	1.5	1.098	1.43345	2.23687
11300	0.776	0.534	-0.34	0.566	1.407	0.013	2.01	0.058	6300	0.336	0.264	0.537	0.504	0.645	0.375	1.44	1.079	1.41785	2.3973
11330	0.755	0.535	-0.38	0.557	1.401	0.022	1.939	0.061	6330	0.331	0.258	0.536	0.487	0.641	0.372	1.45	1.023	1.42379	2.52921
11360	0.738	0.535	-0.41	0.548	1.395	0.03	1.929	0.033	6360	0.3	0.263	0.554	0.475	0.645	0.376	1.4	0.971	1.34364	2.61421
11390	0.729	0.54	-0.43	0.544	1.39	0.039	1.842	0.057	6390	0.288	0.282	0.568	0.471	0.635	0.391	1.46	0.957	1.25781	2.5569
11420	0.71	0.542	-0.45	0.541	1.383	0.047	1.762	0.076	6420	0.294	0.275	0.58	0.463	0.624	0.405	1.53	0.98	1.3481	2.52873
11450	0.708	0.538	-0.46	0.534	1.377	0.056	1.692	0.087	6450	0.3	0.266	0.593	0.456	0.644	0.414	1.47	1.042	1.38851	2.45883
11480	0.699	0.535	-0.46	0.518	1.37	0.064	1.627	0.093	6480	0.317	0.255	0.59	0.456	0.669	0.438	1.46	1.088	1.24986	2.22769
11510	0.688	0.545	-0.47	0.494	1.363	0.071	1.562	0.099	6510	0.327	0.261	0.585	0.456	0.664	0.452	1.41	1.143	1.20017	2.03325
11540	0.703	0.562	-0.47	0.475	1.356	0.079	1.497	0.105	6540	0.323	0.245	0.577	0.459	0.686	0.459	1.4	1.192	1.12038	1.90902
11570	0.727	0.609	-0.47	0.464	1.349	0.085	1.429	0.115	6570	0.321	0.243	0.568	0.454	0.711	0.455	1.37	1.272	1.00149	1.80906
11600	0.687	0.603	-0.46	0.461	1.349	0.086	1.358	0.131	6600	0.323	0.242	0.56	0.46	0.691	0.436	1.37	1.276	0.821816	1.72834
11630	0.632	0.588	-0.47	0.461	1.353	0.082	1.269	0.169	6630	0.333	0.241	0.558	0.486	0.675	0.425	1.11	1.293	0.608832	1.68177
11660	0.599	0.59	-0.48	0.461	1.356	0.077	1.255	0.171	6660	0.333	0.235	0.553	0.514	0.665	0.413	0.88	1.374	0.428372	1.63795
11690	0.535	0.592	-0.49	0.465	1.356	0.073	1.184	0.221	6690	0.318	0.23	0.55	0.542	0.657	0.401	0.67	1.503	0.263921	1.59066
11720	0.463	0.599	-0.49	0.471	1.354	0.068	1.023	0.253	6720	0.309	0.235	0.54	0.545	0.655	0.39	0.48	1.618	0.119016	1.49721
11750	0.382	0.635	-0.47	0.47	1.348	0.062	0.847	0.236	6750	0.292	0.227	0.504	0.495	0.651	0.385	0.26	1.709	-0.0880629	1.39622
11780	0.381	0.625	-0.45	0.468	1.338	0.055	0.846	0.096	6780	0.28	0.229	0.483	0.479	0.654	0.389	0.11	1.782	-0.184397	1.33132
11810	0.36	0.626	-0.41	0.465	1.321	0.048	0.787	0.109	6810	0.273	0.252	0.476	0.478	0.635	0.395	0.19	1.75	-0.214529	1.31318
11840	0.33	0.632	-0.36	0.462	1.3	0.038	0.796	0.226	6840	0.283	0.256	0.468	0.482	0.615	0.396	0.19	1.758	-0.230375	1.28982
11870	0.3	0.64	-0.31	0.461	1.274	0.026	0.659	0.237	6870	0.294	0.265	0.45	0.472	0.621	0.388	0.11	1.76	-0.219278	1.24229
11900	0.308	0.634	-0.27	0.457	1.242	0.011	0.407	0.128	6900	0.299	0.273	0.434	0.453	0.64	0.388	0.13	1.697	-0.206251	1.18969
11930	0.329	0.628	-0.24	0.45	1.208	0.006	0.157	0.058	6930	0.305	0.267	0.419	0.448	0.69	0.38	0.22	1.583	-0.241015	1.11578
11960	0.337	0.63	-0.22	0.44	1.181	0.027	0.024	0.037	6960	0.31	0.278	0.395	0.45	0.709	0.366	0.25	1.488	-0.266291	1.06725
11990	0.35	0.631	-0.21	0.431	1.167	0.047	0.044	0.218	6990	0.335	0.265	0.381	0.448	0.736	0.361	0.33	1.353	-0.234629	1.05074
12020	0.355	0.635	-0.18	0.423	1.168	0.06	1.203	1.202	7020	0.327	0.252	0.389	0.441	0.765	0.379	0.34	1.251	-0.0916651	1.06529
12050	0.361	0.642	-0.15	0.414	1.181	0.065	0.448	0.831	7050	0.315	0.244	0.407	0.434	0.771	0.402	0.56	1.015	0.0906868	1.03397
12080	0.377	0.648	-0.1	0.409	1.202	0.065	-0.054	0.641	7080	0.309	0.234	0.417	0.434	0.741	0.429	0.42	1.063	0.168545	0.936829
12110	0.388	0.657	-0.05	0.406	1.223	0.065	-0.362	0.593	7110	0.3	0.232	0.423	0.434	0.679	0.476	0.59	0.952	0.260638	0.820093
12140	0.391	0.656	0.02	0.414	1.245	0.063	-0.664	0.558	7140	0.303	0.228	0.428	0.435	0.71	0.468	0.79	0.855	0.386287	0.744668
12170	0.399	0.653	0.07	0.417	1.273	0.067	-0.951	0.533	7170	0.31	0.231	0.452	0.432	0.721	0.464	0.87	0.826	0.54091	0.702534
12200	0.406	0.654	0.11	0.42	1.288	0.062	-1.145	0.468	7200	0.322	0.245	0.475	0.434	0.494	0.267	0.9	0.816	0.648839	0.690675
12230	0.412	0.65	0.14	0.428	1.306	0.058	-1.257	0.365	7230	0.335	0.26	0.528	0.443	0.535	0.223	0.91	0.812	0.774431	0.693026
12260	0.412	0.646	0.12	0.405	1.321	0.053	-1.352	0.258	7260	0.346	0.274	0.55	0.427	0.583	0.187	0.94	0.813	0.869166	0.654846
12290	0.419	0.642	0.14	0.41	1.343	0.052	-1.465	0.155	7290	0.35	0.279	0.566	0.417	0.729	0.175	0.96	0.814	0.876114	0.601264
12320	0.428	0.639	0.16	0.416	1.364	0.051	-1.57	0.07	7320	0.364	0.275	0.574	0.42	0.731	0.124	0.96	0.818	0.914644	0.571462
12350	0.432	0.637	0.19	0.427	1.386	0.049	-1.477	0.111	7350	0.355	0.277	0.572	0.419	0.715	0.123	0.93	0.83	0.943389	0.565471
12380	0.429	0.636	0.23	0.442	1.407	0.048	-1.355	0.136	7380	0.349	0.281	0.566	0.438	0.691	0.128	0.83	0.819	0.97907	0.562375
12410	0.423	0.635	0.27	0.451	1.429	0.047	-1.229	0.16	7410	0.342	0.283	0.549	0.455	0.668	0.134	0.82	0.856	1.01642	0.564018
12440	0.43	0.63	0.28	0.441	1.45	0.046	-1.162	0.146	7440	0.324	0.284	0.529	0.465	0.645	0.108	1	0.832	1.04244	0.570245
12470	0.423	0.631	0.29	0.435	1.471	0.045	-1.081	0.144	7470	0.309	0.291	0.509	0.489	0.644	0.138	0.91	0.801	1.0952	0.551566
12500	0.42	0.627	0.29	0.438	1.491	0.043	-0.998	0.14	7500	0.324	0.302	0.491	0.516	0.633	0.17	0.75	0.775	1.24713	0.454599
12530	0.432	0.623	0.29	0.464	1.488	0.024	-0.754	0.232	7530	0.313	0.31	0.458	0.535	0.605	0.22	0.59	0.775	1.37317	0.415315
12560	0.434	0.617	0.39	0.634	1.486	0.007	-0.578	0.251	7560	0.288	0.305	0.426	0.558	0.59	0.287	0.4	0.827	1.5883	0.278365
12590	0.426	0.607	0.34	0.615	1.49	0.007	-0.395	0.297	7590	0.292	0.279	0.413	0.573	0.54	0.348	0.24	0.923	1.75964	0.171909
12620	0.414	0.602	0.3	0.593	1.503	0.015	-0.329	0.267	7620	0.308	0.284	0.413	0.579	0.589	0.347	0.19	0.969	1.95011	0.0837758
12650	0.394	0.6	0.22	0.529	1.516	0.021	-0.163	0.268	7650	0.307	0.287	0.433	0.571	0.658	0.363	0.22	0.973	2.20274	0.114986
12680	0.37	0.6	0.13	0.456	1.533	0.026	-0.06	0.195	7680	0.303	0.288	0.469	0.56	0.752	0.381	0.22	0.997	2.49527	0.209126
12710	0.36	0.592	0.03	0.388	1.554	0.027	0.012	0.105	7710	0.251	0.261	0.491	0.588	0.516	0.131	0.26	1.02	2.49397	0.380419
12740	0.349	0.586	-0.08	0.33	1.582	0.023	-0.035	0.062	7740	0.223	0.267	0.489	0.612	0.539	0.122	0.4	1.007	2.45684	0.48535
12770	0.326	0.59	-0.18	0.286	1.61	0.02	-0.234	0.331	7770	0.229	0.258	0.487	0.635	0.46	0.078	0.65	0.967	2.52346	0.595804
12800	0.311	0.589	-0.26	0.254	1.613	0.034	-0.255	0.492	7800	0.22	0.254	0.504	0.645	0.417	0.097	0.52	0.993	2.3888	0.564435
12830	0.307	0.585	-0.34	0.242	1.611	0.052	-0.286	0.57	7830	0.221	0.26	0.568	0.658	0.272	0.147	0.59	1.01	2.37783	0.611855
12860	0.291	0.583	-0.42	0.259	1.609	0.07	-0.493	0.594	7860	0.216	0.276	0.527	0.703	0.319	0.301	0.69	0.999	2.35427	0.638038
12890	0.258	0.59	-0.41	0.242	1.605	0.089	-0.625	0.62	7890	0.183	0.294	0.489	0.754	0.137	0.315	0.72	0.967	2.4815	0.70863
12920	0.236	0.593	-0.46	0.243	1.601	0.109	-0.817	0.751	7920	0.171	0.289	0.502	0.795	0.064	0.333	0.78	0.935	2.57999	0.767995
12950	0.212	0.596	-0.51	0.247	1.596	0.129	-1.014	0.814	7950	0.168	0.307	0.519	0.773	0.008	0.359	0.73	0.913	2.63493	0.809963
12980	0.186	0.6	-0.57	0.255	1.591	0.149	-1.046	0.754	7980	0.147	0.308	0.58	0.804	0.011	0.365	0.68	0.887	2.59417	0.829667
13010	0.174	0.593	-0.62	0.264	1.586	0.169	-1.03	0.729	8010	0.108	0.289	0.581	0.758	0.005	0.369	0.64	0.877	2.37868	0.821538
13040	0.163	0.594	-0.66	0.274	1.579	0.19	-0.37	0.195	8040	0.091	0.297	0.573	0.692	-0.012	0.36	0.61	0.866	2.18452	0.804557
13070	0.149	0.6	-0.67	0.283	1.571	0.212	-1.371	0.788	8070	0.067	0.303	0.571	0.614	-0.086	0.316	0.55	0.833	2.04541	0.731222
13100	0.156	0.593	-0.69	0.292	1.567	0.232	-1.913	1.146	8100	0.079	0.321	0.519	0.6	-0.12	0.329	0.54	0.797	1.94934	0.637174
13130	0.173	0.589	-0.71	0.306	1.566	0.249	-1.409	0.831	8130	0.045	0.322	0.416	0.591	-0.131	0.355	0.55	0.772	1.85493	0.564016
13160	0.185	0.584	-0.7	0.338	1.561	0.269	-1.535	0.961	8160	-0.005	0.35	0.409	0.517	-0.173	0.349	0.56	0.725	1.82836	0.639316
13190	0.192	0.581	-0.74	0.349	1.554	0.29	-2.044	1.307	8190	0.019	0.352	0.42	0.475	-0.183	0.401	0.64	0.618	1.83526	0.721964
13220	0.218	0.56	-0.77	0.373	1.546	0.312	-0.974	0.598	8220	-0.005	0.372	0.618	0.647	-0.213	0.466	0.75	0.511	1.95641	0.733423
13250	0.23	0.56	-0.79	0.406	1.539	0.334	-1.101	0.779	8250	-0.038	0.377	0.544	0.672	-0.186	0.527	0.87	0.407	2.12514	0.761131
13280	0.246	0.562	-0.82	0.445	1.531	0.356	-1.137	0.874	8280	-0.079	0.428	0.486	0.758	-0.155	0.577	0.98	0.311	2.21117	0.844358
13310	0.263	0.557	-0.84	0.489	1.508	0.389	-0.653	0.603	8310	-0.035	0.386	0.369	0.579	-0.094	0.611	1	0.277	2.32592	0.945385
13340	0.28	0.557	-0.97	0.585	1.467	0.435	-1.064	0.98	8340	-0.043	0.396	0.402	0.547	-0.115	0.641	0.91	0.3	2.43479	0.984265
13370	0.303	0.541	-0.89	0.591	1.429	0.478	-1.766	1.562	8370	-0.036	0.407	0.455	0.536	-0.124	0.677	0.8	0.324	2.58582	1.03274
13400	0.307	0.542	-0.91	0.649	1.385	0.526	-0.202	0.526	8400	-0.029	0.413	0.465	0.538	-0.152	0.674	0.66	0.331	2.63197	0.985229
13430	0.302	0.541	-0.9	0.695	1.34	0.574	0.337	0.186	8430	-0.039	0.421	0.49	0.553	-0.181	0.672	0.5	0.337	2.69034	0.938595
13460	0.293	0.538	-0.91	0.73	1.297	0.621	-0.902	1.108	8460	-0.036	0.42	0.518	0.574	-0.22	0.675	0.39	0.397	2.70084	0.902162
13490	0.286	0.535	-0.94	0.763	1.255	0.667	-0.89	1.155	8490	-0.037	0.422	0.521	0.595	-0.254	0.679	0.16	0.516	2.59843	0.791707
13520	0.272	0.54	-0.97	0.799	1.237	0.696	0.001	0.563	8520	-0.045	0.425	0.417	0.604	-0.256	0.681	-0.02	0.577	2.50115	0.700299
13550	0.249	0.54	-1	0.838	1.217	0.727	-0.246	0.735	8550	-0.043	0.424	0.378	0.603	-0.255	0.685	0.2	0.421	2.42521	0.646475
13580	0.221	0.532	-1.01	0.883	1.197	0.758	-1.035	1.283	8580	-0.045	0.427	0.343	0.621	-0.225	0.69	0.16	0.439	2.35386	0.629494
13610	0.187	0.529	-1.03	0.927	1.177	0.788	-1.933	1.91	8610	-0.041	0.422	0.32	0.625	-0.19	0.694	0	0.474	2.47103	0.703258
13640	0.16	0.53	-1.05	0.973	1.157	0.818	-0.06	0.578	8640	-0.01	0.414	0.276	0.641	-0.127	0.714	-0.12	0.404	2.39636	0.634948
13670	0.138	0.537	-1.06	1.019	1.138	0.849	0.412	0.247	8670	-0.018	0.418	0.262	0.645	-0.074	0.735	-0.29	0.376	2.29698	0.52084
13700	0.128	0.546	-1.08	1.064	1.121	0.876	0.245	0.366	8700	-0.01	0.415	0.182	0.648	-0.053	0.742	-0.38	0.356	2.2254	0.418816
13730	0.117	0.556	-1.06	1.071	1.108	0.902	-0.154	0.622	8730	0.004	0.407	0.159	0.667	-0.05	0.737	-0.41	0.251	2.1182	0.308842
13760	0.101	0.57	-1.03	1.042	1.094	0.926	0.08	0.411	8760	0.018	0.401	0.143	0.688	-0.051	0.726	-0.55	0.139	2.06265	0.270412
13790	0.074	0.579	-1	1.02	1.094	0.941	-0.033	0.452	8790	0.018	0.396	0.13	0.711	-0.052	0.708	-0.68	0.068	1.98457	0.268686
13820	0.049	0.586	-0.97	1.009	1.091	0.956	-0.457	0.701	8820	0.008	0.396	0.141	0.725	-0.049	0.686	-0.82	0.095	1.9928	0.405098
13850	0.027	0.588	-0.96	1.027	1.082	0.973	-0.614	0.739	8850	-0.009	0.404	0.141	0.745	-0.023	0.68	-0.97	0.186	1.85066	0.429338
13880	0.008	0.588	-0.95	1.035	1.066	0.987	-1.008	0.976	8880	-0.035	0.412	0.128	0.773	0.009	0.682	-1.12	0.28	1.72227	0.388825
13910	-0.024	0.589	-0.93	1.028	1.035	0.991	-1.237	1.082	8910	-0.047	0.422	0.173	0.801	0.022	0.682	-1.81	0.33	1.63537	0.348917
13940	-0.06	0.591	-0.9	1.01	0.99	0.986	-0.819	0.725	8940	-0.057	0.444	0.121	0.826	0.024	0.687	-1.28	0.339	1.51335	0.428807
13970	-0.085	0.596	-0.89	0.99	1.053	1.057	-0.501	0.44	8970	-0.076	0.461	0.098	0.837	0.057	0.697	-1.19	0.49	1.4518	0.567365
14000	-0.113	0.598	-0.89	0.971	1.137	1.142	-0.52	0.392	9000	-0.09	0.493	0.096	0.895	0.101	0.714	-1.24	0.571	1.43986	0.680822
14030	-0.143	0.605	-0.89	0.958	1.135	1.167	-0.86	0.568	9030	-0.011	0.459	0.101	0.895	0.145	0.733	-1.25	0.619	1.39808	0.761754
14060	-0.183	0.622	-0.9	0.939	1.108	1.174	-0.731	0.414	9060	-0.011	0.459	0.107	0.893	0.164	0.765	-1.21	0.601	1.32832	0.82562
14090	-0.247	0.639	-0.9	0.915	1.073	1.172	-0.173	0.036	9090	-0.002	0.452	0.101	0.877	0.179	0.8	-1.21	0.546	1.42513	0.826107
14120	-0.31	0.65	-0.89	0.885	1.036	1.166	0.098	0.298	9120	0.003	0.451	0.091	0.871	0.197	0.834	-1.05	0.651	1.57253	0.831199
14150	-0.356	0.648	-0.88	0.86	0.998	1.157	-0.059	0.288	9150	0.006	0.445	0.076	0.865	0.189	0.834	-0.98	0.685	1.6785	0.884395
14180	-0.403	0.648	-0.87	0.839	0.995	1.122	-0.153	0.321	9180	-0.005	0.444	0.067	0.863	0.17	0.837	-0.95	0.667	1.86083	0.974956
14210	-0.453	0.658	-0.85	0.821	0.991	1.087	-0.262	0.341	9210	-0.013	0.44	0.069	0.87	0.149	0.85	-0.84	0.65	2.01136	1.07412
14240	-0.491	0.675	-0.83	0.799	0.974	1.06	-0.607	0.186	9240	0	0.436	0.067	0.874	0.14	0.859	-0.67	0.651	2.13506	1.19738
14270	-0.563	0.692	-0.8	0.774	0.951	1.037	-1.428	0.295	9270	0.012	0.435	0.063	0.883	0.131	0.871	-0.51	0.687	2.22651	1.31004
14300	-0.638	0.715	-0.79	0.754	0.926	1.016	-1.2	0.076	9300	0.016	0.432	0.075	0.892	0.108	0.886	-0.46	0.669	2.14918	1.33817
14330	-0.704	0.742	-0.78	0.745	0.899	0.995	-1.195	0.044	9330	0.016	0.434	0.064	0.889	0.092	0.886	-0.37	0.685	2.07862	1.30794
14360	-0.773	0.78	-0.78	0.739	0.871	0.974	-1.482	0.024	9360	0.028	0.436	0.045	0.89	0.083	0.886	-0.32	0.709	2.08233	1.30279
14390	-0.847	0.838	-0.8	0.738	0.844	0.953	-1.575	0.211	9390	0.02	0.445	0.027	0.896	0.036	0.863	-0.25	0.756	1.97116	1.26508
14420	-0.863	0.857	-0.81	0.739	0.817	0.933	-1.839	0.328	9420	0.062	0.41	0.009	0.885	-0.017	0.84	-0.14	0.825	1.83859	1.22352
14450	-0.854	0.85	-0.82	0.737	0.79	0.912	-2.2	0.504	9450	0.044	0.418	-0.006	0.881	-0.057	0.819	-0.09	0.868	1.74298	1.19092
14480	-0.894	0.871	-0.84	0.734	0.763	0.892	-2.119	0.336	9480	0.047	0.418	-0.019	0.879	-0.091	0.799	-0.15	0.883	1.63203	1.16839
14510	-0.916	0.881	-0.85	0.728	0.735	0.871	-2.044	0.21	9510	0.024	0.407	-0.024	0.878	-0.088	0.804	-0.08	0.975	1.54671	1.15489
14540	-0.937	0.896	-0.87	0.716	0.706	0.852	-1.967	0.12	9540	0.02	0.409	-0.031	0.875	-0.096	0.804	-0.03	1.067	1.5304	1.14068
14570	-0.947	0.89	-0.9	0.696	0.676	0.833	-1.87	0	9570	0.008	0.419	-0.038	0.875	-0.07	0.827	-0.1	1.068	1.43073	1.13957
14600	-0.967	0.883	-0.95	0.688	0.646	0.815	-1.971	0.016	9600	-0.006	0.431	-0.043	0.882	-0.029	0.857	-0.09	1.043	1.36485	1.12918
14630	-0.954	0.86	-1.01	0.693	0.615	0.797	-2.106	0.055	9630	-0.015	0.431	-0.045	0.893	-0.001	0.876	-0.15	0.967	1.34426	1.0914
14660	-0.949	0.843	-1.08	0.702	0.585	0.778	-2.156	0.035	9660	-0.034	0.431	-0.035	0.902	0.028	0.896	-0.19	0.913	1.30406	1.06776
14690	-0.931	0.827	-1.14	0.709	0.555	0.759	-2.092	0.066	9690	-0.059	0.443	-0.015	0.916	0.043	0.907	-0.18	0.905	1.27382	1.04889
14720	-0.96	0.827	-1.21	0.718	0.525	0.74	-2.105	0.11	9720	-0.09	0.451	0.004	0.935	0.061	0.92	-0.19	0.903	1.2656	1.02659
14750	-0.99	0.83	-1.27	0.73	0.496	0.721	-2.31	0.015	9750	-0.093	0.459	0.016	0.957	0.077	0.931	-0.2	0.913	1.26505	1.00209
14780	-1.012	0.831	-1.34	0.75	0.467	0.702	-2.294	0.058	9780	-0.098	0.463	0.029	0.97	0.085	0.936	-0.28	0.869	1.28248	0.971459
14810	-1.039	0.84	-1.41	0.774	0.438	0.683	-2.348	0.023	9810	-0.108	0.472	0.035	0.984	0.093	0.942	-0.38	0.796	1.30136	0.940233
14840	-1.055	0.839	-1.47	0.796	0.409	0.664	-2.407	0.016	9840	-0.122	0.483	0.079	1.002	0.111	0.955	-0.48	0.721	1.28561	0.9124
14870	-1.065	0.821	-1.54	0.828	0.381	0.645	-2.506	0.078	9870	-0.132	0.497	0.045	1.018	0.556	0.856	-0.54	0.691	1.32749	0.860158
14900	-1.062	0.805	-1.61	0.866	0.355	0.626	-2.32	0.067	9900	-0.132	0.513	0.047	1.019	0.537	0.843	-0.6	0.67	1.39502	0.803583
14930	-1.057	0.785	-1.67	0.894	0.331	0.609	-2.239	0.14	9930	-0.15	0.524	0.045	1.023	0.543	0.846	-0.65	0.651	1.46074	0.753973
14960	-1.057	0.775	-1.71	0.908	0.311	0.593	-2.817	0.245	9960	-0.075	0.514	0.021	1.025	1.344	0.631	-0.79	0.624	2.21788	0.569268
14990	-1.068	0.775	-1.76	0.919	0.298	0.586	-3.338	0.588	9990	-0.088	0.513	0.001	1.031	1.324	0.636	-0.82	0.557	2.31936	0.477682
15020	-1.087	0.776	-1.82	0.93	0.307	0.594	-4.629	1.473
15050	-1.094	0.765	-1.87	0.947	0.308	0.597	-4.727	1.515
15080	-1.104	0.76	-1.93	0.969	0.225	0.541	-5.491	2.028
15110	-1.105	0.75	-1.99	0.986	0.154	0.493	-5.668	2.136
15140	-1.1	0.738	-2.02	0.98	0.097	0.455	-5.708	2.13
15170	-1.069	0.718	-2.05	0.963	0.045	0.421	-5.921	2.239
15200	-1.059	0.7	-2.07	0.945	-0.005	0.388	-6.143	2.356
15230	-1.053	0.675	-2.09	0.931	-0.054	0.354	-6.222	2.375
15260	-1.04	0.653	-1.72	0.764	-0.102	0.32	-6.04	2.212
15290	-1.052	0.642	-1.72	0.735	-0.151	0.286	-5.946	2.114
15320	-1.071	0.637	-1.72	0.703	-0.2	0.253	-5.824	1.997
15350	-1.089	0.634	-1.72	0.664	-0.25	0.219	-5.469	1.719
15380	-1.105	0.634	-1.72	0.633	-0.297	0.189	-4.939	1.324
15410	-1.122	0.637	-1.74	0.605	-0.334	0.167	-4.451	0.969
15440	-0.965	0.556	-1.74	0.575	-0.36	0.151	-4.001	0.63
15470	-0.957	0.536	-1.75	0.545	-0.381	0.14	-3.569	0.298
15500	-0.947	0.518	-1.76	0.521	-0.399	0.132	-3.133	0.022
15530	-0.927	0.518	-1.79	0.528	-0.416	0.124	-2.701	0.343
15560	-0.932	0.499	-1.84	0.544	-0.433	0.117	-2.277	0.677
15590	-0.939	0.483	-1.87	0.556	-0.449	0.109	-1.836	1.016
15620	-0.949	0.469	-1.89	0.552	-0.466	0.101	-1.355	1.351
15650	-0.955	0.454	-1.88	0.537	-0.483	0.093	-3.255
15680	-0.957	0.438	-1.88	0.536	-0.501	0.084	-3.252
15710	-0.961	0.423	-1.86	0.519	-0.519	0.075	-3.254
15740	-0.97	0.414	-1.83	0.498	-0.537	0.066	-3.277
15770	-0.98	0.408	-1.81	0.48	-0.556	0.057	-3.314
15800	-0.993	0.405	-1.79	0.463	-0.575	0.047	-3.358
15830	-1.006	0.401	-1.77	0.449	-0.594	0.038	-3.413
15860	-1.019	0.395	-1.76	0.436	-0.614	0.028	-3.48
15890	-1.031	0.39	-1.75	0.424	-0.634	0.018	-3.545
15920	-1.048	0.388	-1.73	0.413	-0.656	0.009	-3.562
15950	-1.054	0.386	-1.71	0.401	-0.678	0.001	-3.529
15980	-1.046	0.384	-1.68	0.39	-0.701	0.008	-3.493
16010	-1.043	0.385	-1.65	0.379	-0.725	0.016	-3.461
16040	-1.05	0.389	-1.62	0.371	-0.748	0.025	-3.431
16070	-1.037	0.38	-1.59	0.366	-0.771	0.035	-3.402
16100	-1.031	0.379	-1.54	0.393	-0.794	0.047	-3.375
16130	-1.015	0.379	-1.55	0.395	-0.817	0.058	-3.351
16160	-1.004	0.379	-1.55	0.4	-0.84	0.069	-3.33
16190	-0.992	0.381	-1.55	0.407	-0.861	0.08	-3.311
16220	-0.986	0.384	-1.56	0.424	-0.881	0.091	-3.279
16250	-0.983	0.39	-1.57	0.462	-0.899	0.101	-3.25
16280	-0.97	0.392	-1.62	0.55	-0.914	0.11	-3.246
16310	-0.967	0.393	-1.7	0.651	-0.926	0.117	-3.259
16340	-0.96	0.397	-1.63	0.574	-0.936	0.119	-3.275
16370	-0.977	0.397	-1.52	0.462	-0.943	0.114	-3.278
16400	-0.986	0.396	-1.47	0.419	-0.939	0.099	-3.281
16430	-0.997	0.402	-1.45	0.412	-0.917	0.069	-3.285
16460	-1.01	0.407	-1.43	0.417	-0.868	0.02	-3.288
16490	-1.018	0.415	-1.41	0.425	-0.795	0.046	-3.287
16520	-1.019	0.426	-1.39	0.434	-0.727	0.109	-3.277
16550	-1.026	0.442	-1.37	0.44	-0.709	0.137	-3.289
16580	-1.048	0.448	-1.37	0.442	-0.732	0.136	-3.36
16610	-1.07	0.446	-1.37	0.435	-0.778	0.117	-3.412
16640	-1.093	0.454	-1.36	0.435	-0.82	0.102	-3.459
16670	-1.123	0.465	-1.34	0.44	-0.848	0.095	-3.517
16700	-1.143	0.479	-1.33	0.446	-0.866	0.096	-3.556
16730	-1.181	0.492	-1.31	0.454	-0.877	0.101	-3.589
16760	-1.219	0.5	-1.3	0.46	-0.883	0.11	-3.64
16790	-1.251	0.509	-1.29	0.464	-0.886	0.121	-3.697
16820	-1.284	0.518	-1.28	0.469	-0.887	0.132	-3.771
16850	-1.315	0.525	-1.28	0.475	-0.886	0.145	-3.83
16880	-1.347	0.536	-1.27	0.479	-0.885	0.159	-3.797
16910	-1.38	0.545	-1.27	0.483	-0.881	0.179	-3.762
16940	-1.41	0.555	-1.26	0.492	-0.882	0.197	-3.792
16970	-1.459	0.558	-1.25	0.497	-0.888	0.212	-3.704
17000	-1.493	0.567	-1.25	0.5	-0.898	0.223	-3.68
17030	-1.487	0.584	-1.25	0.501	-0.912	0.231	-3.656
17060	-1.507	0.584	-1.24	0.504	-0.931	0.235	-3.622
17090	-1.534	0.58	-1.25	0.507	-0.951	0.239	-3.611
17120	-1.554	0.564	-1.25	0.51	-0.973	0.242	-3.608
17150	-1.573	0.562	-1.26	0.514	-0.996	0.245	-3.595
17180	-1.573	0.569	-1.27	0.52	-1.017	0.249	-3.584
17210	-1.571	0.572	-1.28	0.529	-1.038	0.253	-3.584
17240	-1.575	0.579	-1.28	0.545	-1.059	0.257	-3.608
17270	-1.583	0.58	-1.28	0.557	-1.078	0.262	-3.585
17300	-1.59	0.582	-1.29	0.562	-1.096	0.267	-3.57
17330	-1.594	0.584	-1.3	0.563	-1.113	0.271	-3.579
17360	-1.604	0.591	-1.31	0.564	-1.129	0.276	-3.589
17390	-1.62	0.599	-1.32	0.567	-1.145	0.281	-3.573
17420	-1.621	0.603	-1.34	0.569	-1.162	0.288	-3.55
17450	-1.617	0.602	-1.34	0.576	-1.179	0.295	-3.537
17480	-1.613	0.6	-1.34	0.588	-1.195	0.301	-3.514
17510	-1.604	0.592	-1.34	0.602	-1.211	0.308	-3.473
17540	-1.604	0.585	-1.35	0.613	-1.227	0.316	-3.417
17570	-1.614	0.569	-1.37	0.616	-1.242	0.322	-3.403
17600	-1.63	0.555	-1.39	0.607	-1.257	0.329	-3.431
17630	-1.653	0.54	-1.41	0.593	-1.271	0.335	-3.17
17660	-1.662	0.534	-1.43	0.578	-1.286	0.342	-3.109
17690	-1.668	0.529	-1.45	0.563	-1.3	0.349	-2.81
17720	-1.672	0.524	-1.47	0.549	-1.316	0.357	-2.731
17750	-1.676	0.523	-1.48	0.538	-1.329	0.367	-2.575
17780	-1.679	0.531	-1.49	0.53	-1.338	0.378	-2.345
17810	-1.664	0.537	-1.52	0.499	-1.346	0.389	-2.572
17840	-1.668	0.552	-1.56	0.466	-1.354	0.4	-2.908
17870	-1.65	0.55	-1.59	0.442	-1.362	0.412	-3.277
17900	-1.634	0.55	-1.62	0.425	-1.37	0.423	-3.541
17930	-1.633	0.544	-1.64	0.417	-1.378	0.435	-3.828
17960	-1.611	0.542	-1.67	0.414	-1.385	0.446	-3.396
17990	-1.589	0.542	-1.68	0.414	-1.394	0.458	-3.166
18020	-1.597	0.537	-1.68	0.414	-1.402	0.469	-3.02
18050	-1.602	0.536	-1.7	0.395	-1.411	0.479	-2.812
18080	-1.607	0.537	-1.73	0.375	-1.422	0.489	-2.597
18110	-1.603	0.529	-1.76	0.367	-1.434	0.498	-2.398
18140	-1.641	0.546	-1.79	0.367	-1.448	0.505	-2.221
18170	-1.579	0.514	-1.81	0.371	-1.471	0.507	-2.06
18200	-1.551	0.504	-1.84	0.376	-1.497	0.506	-1.909
18230	-1.537	0.49	-1.86	0.382	-1.524	0.504	-2.134
18260	-1.522	0.488	-1.87	0.387	-1.552	0.501	-2.877
18290	-1.504	0.491	-1.89	0.388	-1.582	0.497	-3.044
18320	-1.52	0.489	-1.9	0.387	-1.611	0.493	-3.117
18350	-1.529	0.494	-1.92	0.385	-1.639	0.487	-3.181
18380	-1.521	0.495	-1.93	0.384	-1.661	0.477	-3.243
18410	-1.549	0.493	-1.95	0.385	-1.68	0.464	-3.305
18440	-1.614	0.486	-1.97	0.387	-1.7	0.452	-3.368
18470	-1.592	0.5	-1.97	0.385	-1.721	0.442	-3.431
18500	-1.594	0.501	-1.97	0.381	-1.744	0.432	-3.494
18530	-1.589	0.51	-1.94	0.378	-1.767	0.423	-3.559
18560	-1.583	0.52	-1.88	0.385	-1.791	0.414	-3.628
18590	-1.567	0.53	-1.81	0.414	-1.815	0.405	-3.473
18620	-1.562	0.539	-1.77	0.434	-1.84	0.397	-3.077
18650	-1.549	0.544	-1.82	0.403	-1.865	0.389	-2.827
18680	-1.521	0.542	-1.91	0.387	-1.89	0.381	-2.651
18710	-1.502	0.529	-1.96	0.396	-1.917	0.374	-2.584
18740	-1.482	0.517	-1.98	0.399	-1.943	0.367	-2.468
18770	-1.46	0.504	-2	0.413	-1.97	0.36	-2.395
18800	-1.455	0.5	-2.02	0.435	-1.996	0.352	-2.355
18830	-1.471	0.504	-2.04	0.46	-2.022	0.345	-2.26
18860	-1.487	0.506	-2.05	0.473	-2.047	0.336	-2.234
18890	-1.507	0.512	-2.04	0.471	-2.072	0.328	-2.248
18920	-1.523	0.522	-2.04	0.466	-2.096	0.319	-2.264
18950	-1.529	0.526	-2.04	0.462	-2.121	0.31	-2.23
18980	-1.552	0.539	-2.03	0.463	-2.146	0.301	-2.142
19010	-1.637	0.557	-2.03	0.463	-2.171	0.292	-2.031
19040	-1.646	0.55	-2.02	0.468	-2.196	0.283	-1.872
19070	-1.654	0.55	-2.02	0.479	-2.221	0.274	-1.609
19100	-1.665	0.553	-2.03	0.504	-2.246	0.266	-1.135
19130	-1.665	0.55	-2.04	0.517	-2.271	0.257	-0.539
19160	-1.671	0.552	-2.04	0.488	-2.297	0.248	-0.575
19190	-1.669	0.555	-2.08	0.484	-2.322	0.238	-0.842
19220	-1.673	0.559	-2.13	0.491	-2.347	0.229	-1.098
19250	-1.679	0.568	-2.11	0.496	-2.372	0.22	-1.313
19280	-1.689	0.582	-2.08	0.506	-2.397	0.211	-1.493
19310	-1.697	0.597	-2.07	0.522	-2.422	0.202	-1.735
19340	-1.695	0.605	-2.09	0.556	-2.447	0.193	-1.803
19370	-1.689	0.609	-2.16	0.632	-2.472	0.183	-1.953
19400	-1.681	0.615	-2.16	0.651	-2.497	0.173	-2.103
19430	-1.694	0.639	-2.15	0.657	-2.52	0.163	-2.253
19460	-1.706	0.665	-2.15	0.674	-2.543	0.152	-2.404
19490	-1.702	0.673	-2.17	0.709	-2.565	0.14	-2.557
19520	-1.693	0.665	-2.17	0.734	-2.586	0.128	-2.711
19550	-1.679	0.653	-2.13	0.711	-2.607	0.116	-2.858
19580	-1.663	0.639	-2.05	0.66	-2.628	0.103	-2.961
19610	-1.66	0.623	-2.21	0.708	-2.649	0.091	-2.977
19640	-1.662	0.61	-2.12	0.661	-2.673	0.081	-2.927
19670	-1.672	0.589	-2.02	0.621	-2.698	0.071	-2.821
19700	-1.677	0.572	-1.93	0.59	-2.722	0.061	-2.718
19730	-1.688	0.551	-1.82	0.567	-2.746	0.051	-2.935
19760	-1.686	0.526	-1.78	0.554	-2.769	0.04	-2.567
19790	-1.686	0.503	-1.8	0.541	-2.791	0.028	-2.507
19820	-1.693	0.481	-1.82	0.512	-2.813	0.016	-2.447
19850	-1.695	0.461	-1.79	0.487	-2.835	0.001	-2.379
19880	-1.687	0.439	-1.75	0.465	-2.858	0.015	-2.287
19910	-1.689	0.421	-1.71	0.441	-2.881	0.031	-2.244
19940	-1.669	0.403	-1.66	0.416	-2.903	0.046	-2.092
19970	-1.633	0.386	-1.61	0.392	-2.926	0.062	-2.162
20000	-1.609	0.377	-1.58	0.368	-2.947	0.076	-2.085
20030	-1.592	0.37	-1.56	0.338	-2.968	0.09	-2.042
20060	-1.571	0.371	-1.63	0.323	-2.988	0.104	-2.034
20090	-1.545	0.377	-1.56	0.281	-3.007	0.117	-2.016
20120	-1.541	0.38	-1.49	0.277	-3.027	0.13	-1.983
20150	-1.548	0.381	-1.52	0.298	-3.043	0.141	-1.892
20180	-1.542	0.389	-1.66	0.353	-3.055	0.148	-1.786
20210	-1.567	0.388	-1.73	0.395	-3.061	0.149	-1.754
20240	-1.59	0.384	-1.75	0.401	-3.06	0.147	-1.78
20270	-1.662	0.381	-1.76	0.407	-3.053	0.139	-1.796
20300	-1.723	0.387	-1.77	0.416	-3.043	0.129	-1.807
20330	-1.749	0.401	-1.77	0.424	-3.029	0.117	-1.818
20360	-1.768	0.431	-1.72	0.413	-3.014	0.104	-1.839
20390	-1.795	0.461	-1.64	0.381	-3	0.091	-1.863
20420	-1.792	0.464	-1.58	0.356	-2.986	0.078	-1.89
20450	-1.723	0.47	-1.52	0.33	-2.974	0.067	-1.912
20480	-1.725	0.492	-1.43	0.305	-2.964	0.057	-1.901
20510	-1.711	0.477	-1.36	0.285	-2.954	0.048	-1.906
20540	-1.694	0.462	-1.29	0.27	-2.946	0.042	-1.965
20570	-1.693	0.465	-1.23	0.266	-2.938	0.038	-2.03
20600	-1.703	0.459	-1.16	0.258	-2.931	0.035	-2.092
20630	-1.709	0.478	-1.07	0.252	-2.925	0.033	-2.146
20660	-1.686	0.518	-0.98	0.251	-2.922	0.032	-2.182
20690	-1.682	0.544	-0.91	0.261	-2.92	0.03	-2.219
20720	-1.683	0.562	-0.83	0.28	-2.921	0.029	-2.261
20750	-1.698	0.558	-0.75	0.308	-2.922	0.029	-2.325
20780	-1.719	0.557	-0.69	0.356	-2.924	0.029	-2.376
20810	-1.731	0.558	-0.62	0.402	-2.924	0.031	-2.344
20840	-1.738	0.565	-0.53	0.442	-2.925	0.034	-2.317
20870	-1.758	0.579	-0.43	0.483	-2.931	0.039	-2.308
20900	-1.756	0.604	-0.84	0.201	-2.94	0.047	-2.308
20930	-1.772	0.628	-0.8	0.201	-2.949	0.056	-2.322
20960	-1.778	0.655	-0.77	0.221	-2.958	0.064	-2.352
20990	-1.789	0.684	-0.73	0.257	-2.968	0.073	-2.377
21020	-1.484	0.458	-0.69	0.296	-2.978	0.081	-2.359
21050	-1.491	0.457	-0.65	0.338	-2.988	0.089	-2.286
21080	-1.498	0.456	-0.61	0.381	-3.001	0.096	-2.204
21110	-1.498	0.459	-0.57	0.426	-3.014	0.102	-2.129
21140	-1.497	0.459	-0.54	0.473	-3.029	0.107	-2.094
21170	-1.492	0.466	-0.52	0.522	-3.045	0.112	-2.071
21200	-1.487	0.471	-0.5	0.573	-3.062	0.117	-2.027
21230	-1.488	0.474	-0.47	0.627	-3.079	0.12	-1.947
21260	-1.489	0.479	-0.44	0.679	-3.097	0.124	-1.85
21290	-1.488	0.487	-0.42	0.717	-3.114	0.128	-1.743
21320	-1.491	0.495	-0.42	0.745	-3.132	0.132	-1.634
21350	-1.495	0.501	-0.36	0.781	-3.149	0.136	-1.526
21380	-1.496	0.511	-0.31	0.819	-3.165	0.141	-1.426
21410	-1.505	0.512	-0.26	0.864	-3.18	0.146	-1.333
21440	-1.519	0.508	-0.22	0.915	-3.195	0.15	-1.238
21470	-1.53	0.509	-0.2	0.951	-3.21	0.154	-1.137
21500	-1.538	0.514	-0.21	0.956	-3.224	0.158	-1.031
21530	-1.552	0.514	-0.24	0.948	-3.237	0.162	-0.96
21560	-1.565	0.514	-0.26	0.932	-3.25	0.166	-0.914
21590	-1.578	0.516	-0.28	0.917	-3.259	0.166	-0.875
21620	-1.589	0.518	-0.3	0.904	-3.266	0.166	-0.625
21650	-1.602	0.519	-0.32	0.889	-3.274	0.165	-0.761
21680	-1.617	0.518	-0.34	0.874	-3.284	0.163	-0.684
21710	-1.635	0.508	-0.36	0.856	-3.295	0.159	-0.607
21740	-1.658	0.499	-0.38	0.833	-3.307	0.155	-0.543
21770	-1.662	0.493	-0.38	0.804	-3.32	0.151	-0.51
21800	-1.676	0.482	-0.39	0.775	-3.334	0.146	-0.53
21830	-1.683	0.475	-0.42	0.758	-3.348	0.141	-0.604
21860	-1.688	0.475	-0.46	0.74	-3.362	0.135	-0.697
21890	-1.692	0.477	-0.49	0.717	-3.377	0.13	-0.792
21920	-1.687	0.482	-0.5	0.684	-3.391	0.124	-0.854
21950	-1.682	0.489	-0.49	0.639	-3.405	0.119	-0.885
21980	-1.681	0.495	-0.5	0.596	-3.42	0.113	-0.914
